# Supplementary material for: New MCR based on intramolecular Heck reaction under aerobic conditions: a direct access to cytotoxic fused N-heterocycles
Source: Royal Society of Chemistry journal article supplement (doi:10.1039/c4ra10702k), 2014-09-29
Supplement: c4ra10702k2.pdf [file c4ra10702k2.pdf]

### Copies of $^1\text{H}$ and $^{13}\text{C}$ Spectra

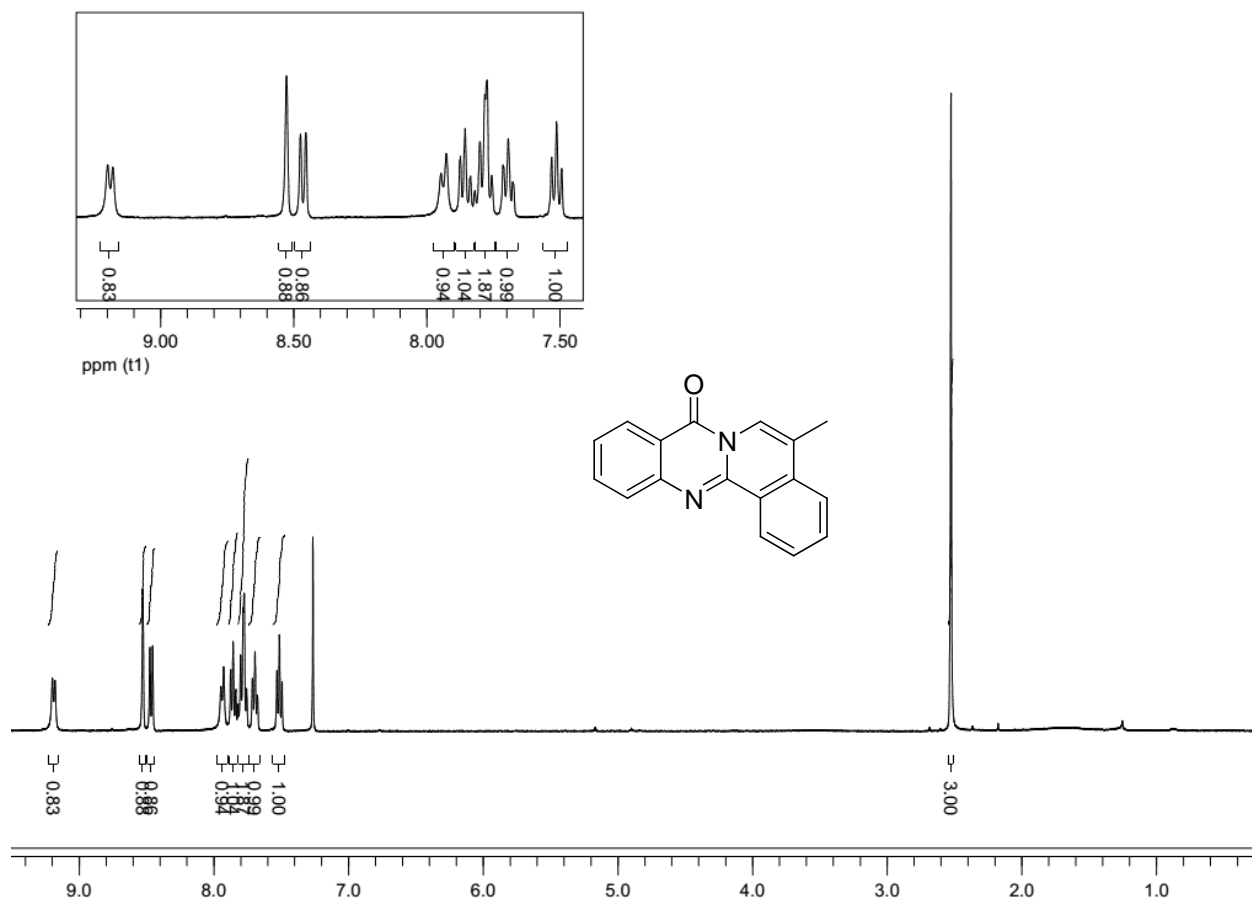

Fig. 1:  $^1\text{H}$  NMR spectra of compound **4a** ( $\text{CDCl}_3$ , 400 MHz)

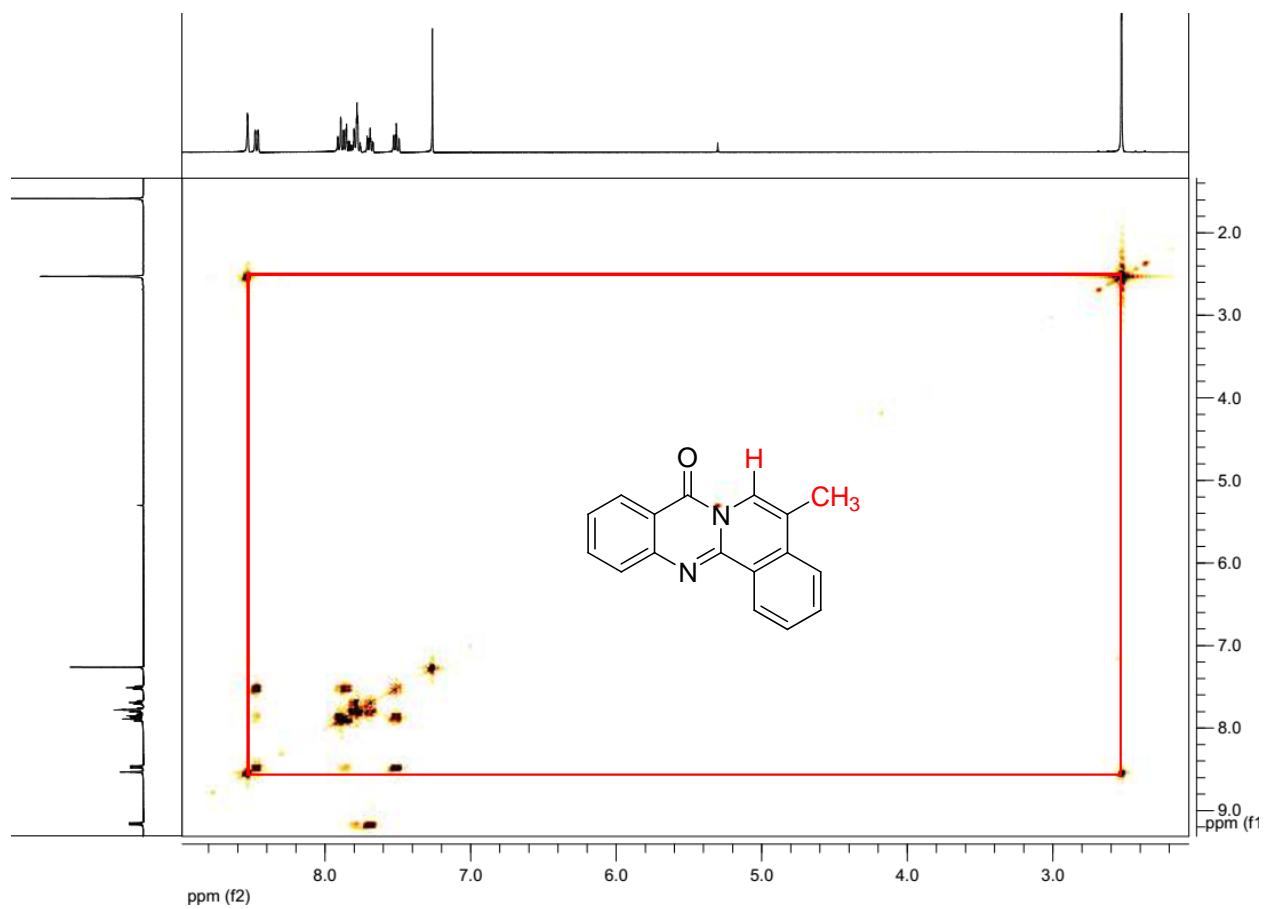

Fig. 2:  $^1\text{H}$ - $^1\text{H}$  COSY spectra of compound **4a** ( $\text{CDCl}_3$ , 400 MHz)

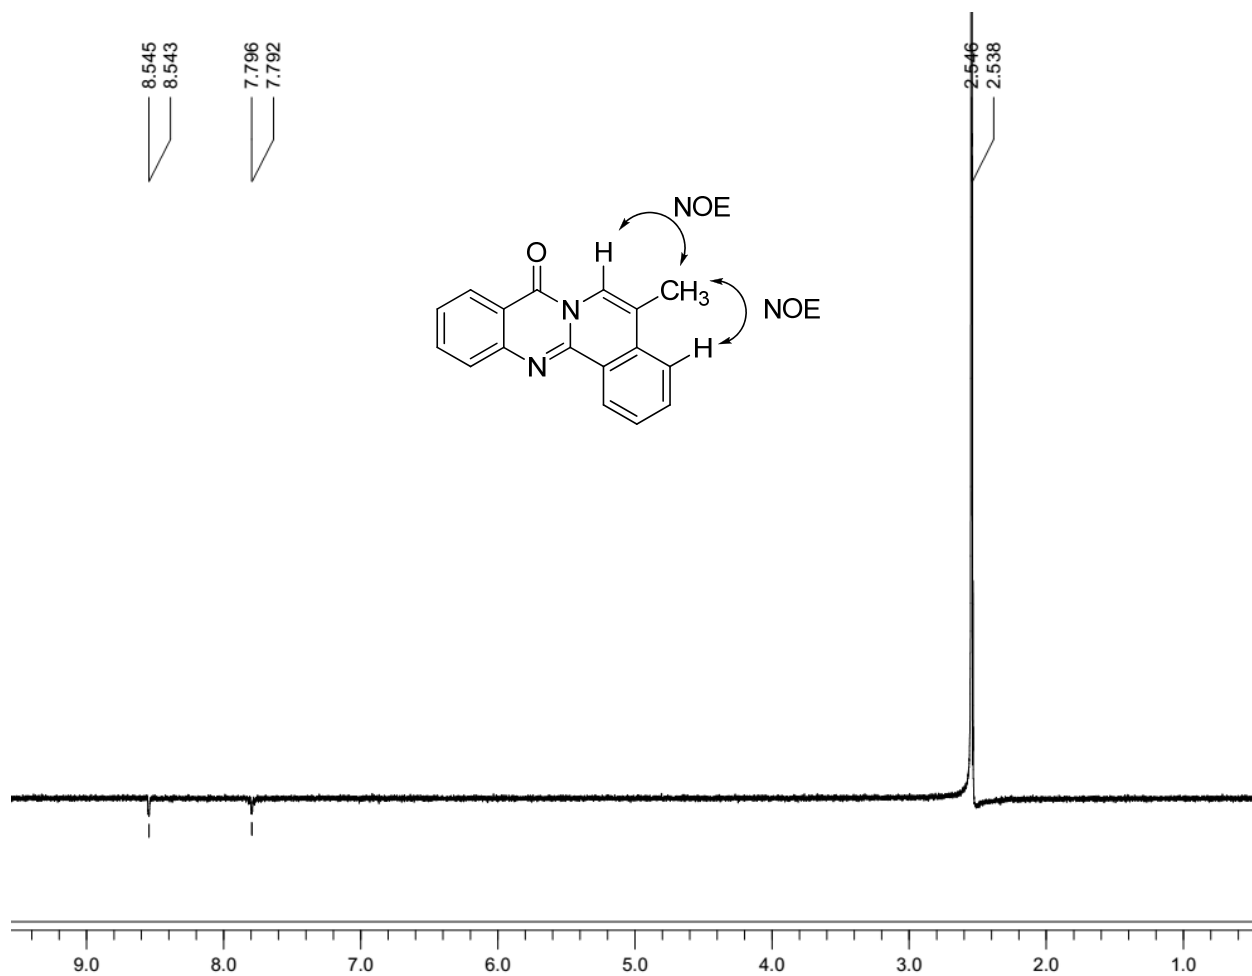

Fig. 3: 1D-NOE spectra of compound **4a** (CDCl<sub>3</sub>, 400 MHz)

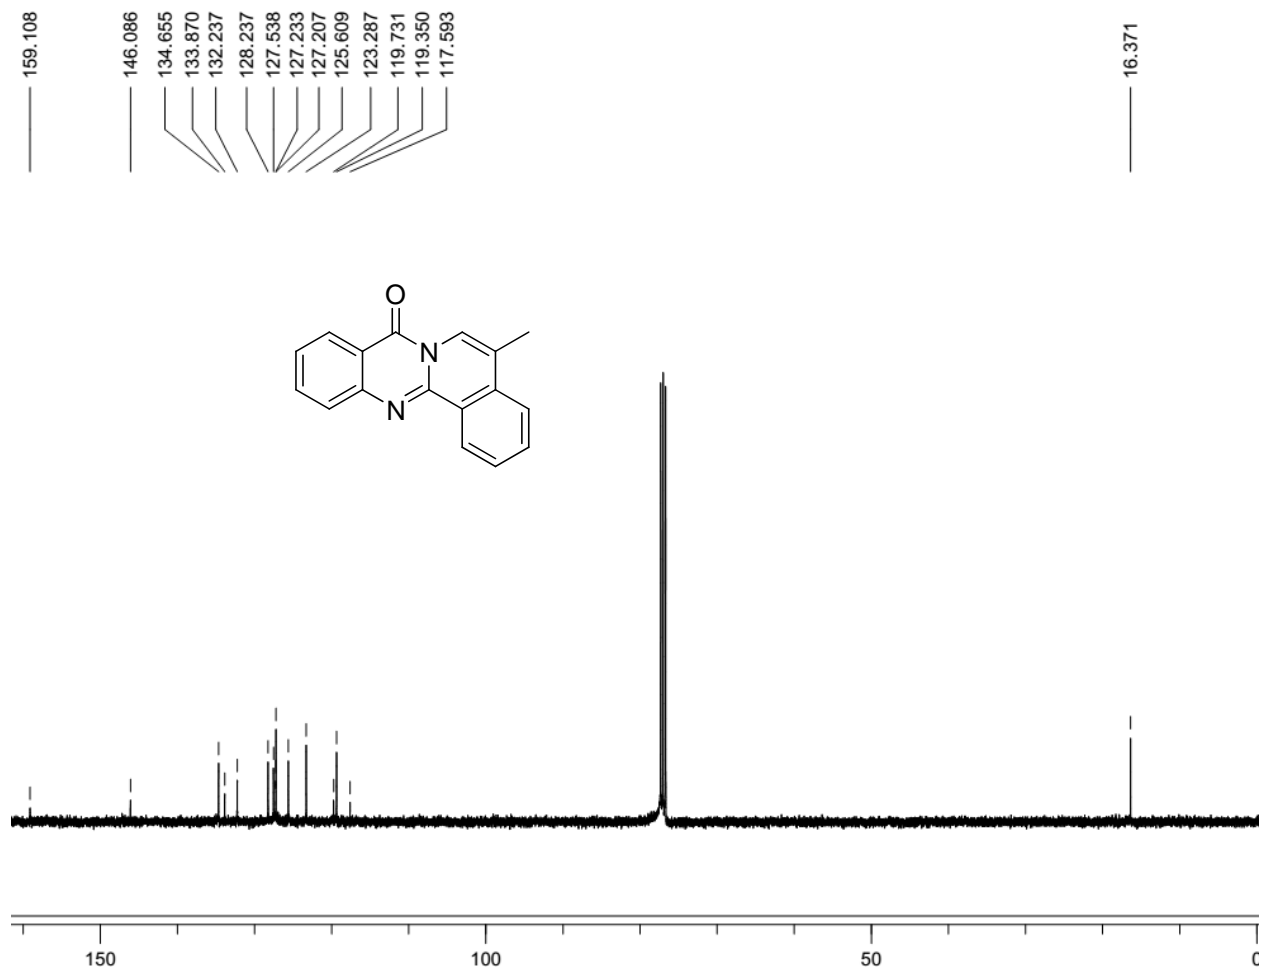

Fig. 4:  $^{13}\text{C}$  NMR spectra of compound **4a** ( $\text{CDCl}_3$ , 100 MHz)

## SAMPLE INFORMATION

Sample Name: ILS/ARJ/5/1  
 Sample Type: Unknown  
 Vial: 27  
 Injection #: 1  
 Injection Volume: 10.00  $\mu$ l  
 Run Time: 30.0 Minutes

Sample Set Name: 240214  
 Acq. Method Set: CFZ  
 Processing Method: CFZ\_PRO  
 Channel Name: 280.0nm  
 Proc. Chnl. Descr.: PDA 280.0 nm

Date Acquired: 2/24/2014 12:13:33 PM IST  
 Date Processed: 2/24/2014 12:49:24 PM IST

Column: XTERRA RP-18 250\*4.6mm 5 $\mu$ m  
 Mobile phase: A) 0.1% TFA in water B) ACN  
 T/%B: 0/20, 3/20, 12/95, 23/95, 25/20, 30/20  
 Flow: 1.0 ml /min, Diluent: ACN: WATER (80:20)

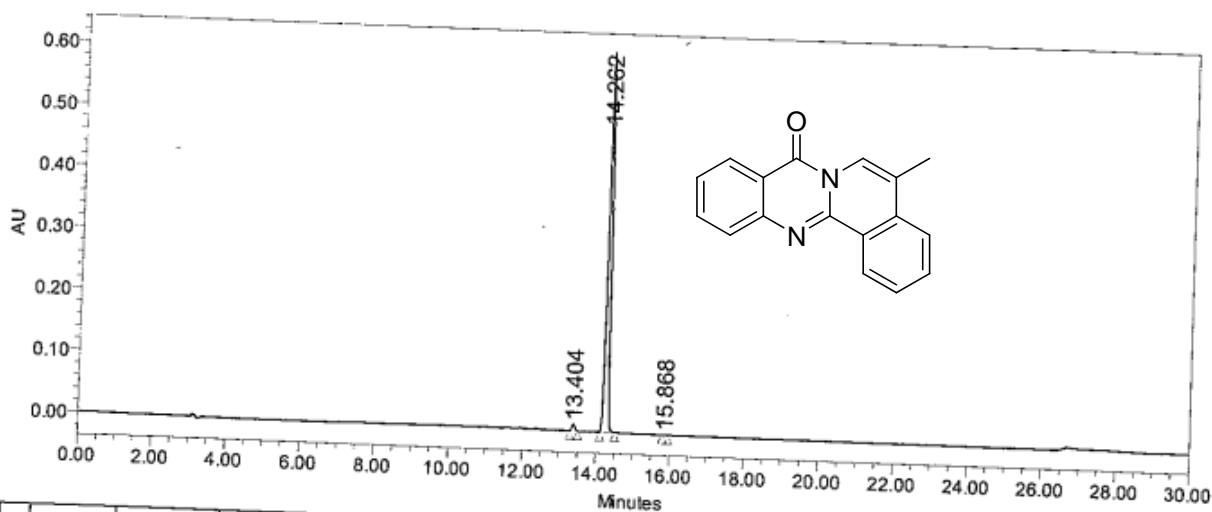

|   | RT     | Area    | % Area | Height |
|---|--------|---------|--------|--------|
| 1 | 13.404 | 59643   | 1.64   | 10771  |
| 2 | 14.262 | 3579738 | 98.20  | 613639 |
| 3 | 15.868 | 6021    | 0.17   | 1270   |

Analysed By *[Signature]* 24/02/14

Fig. 5: HPLC of compound 4a

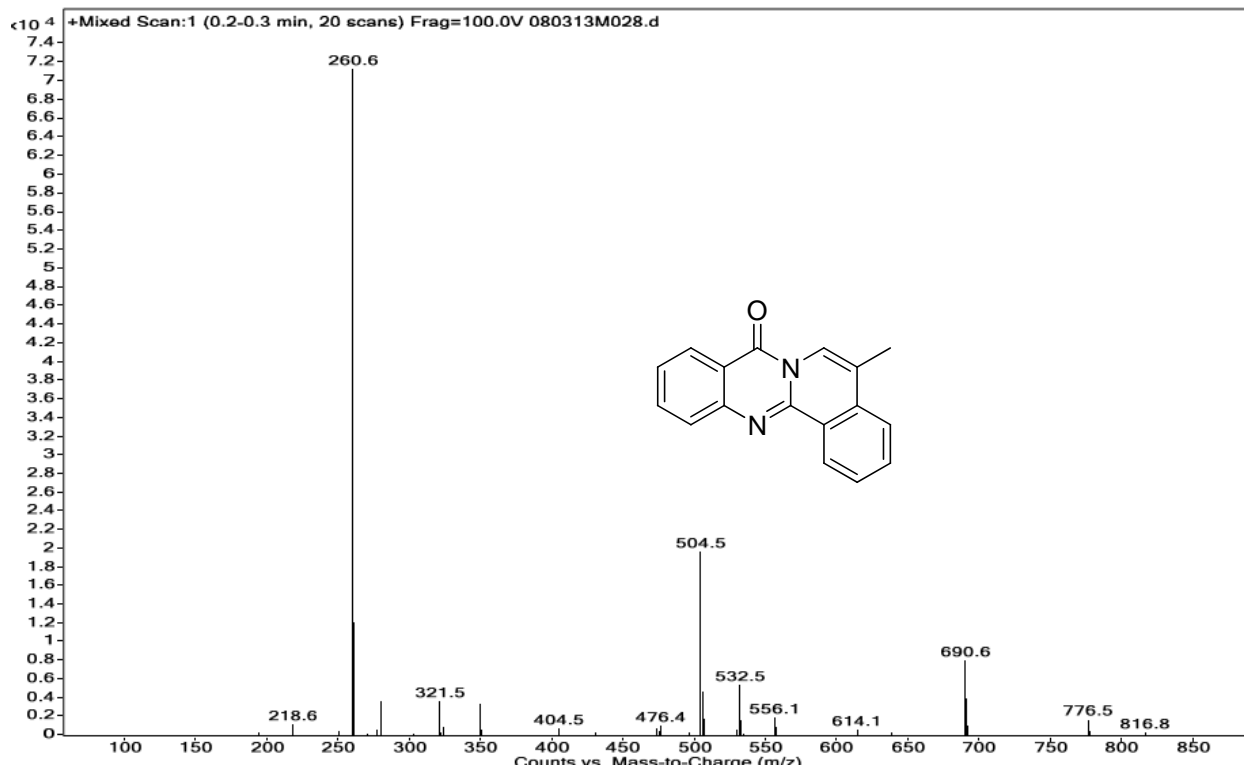

Fig. 6: Mass of compound **4a**

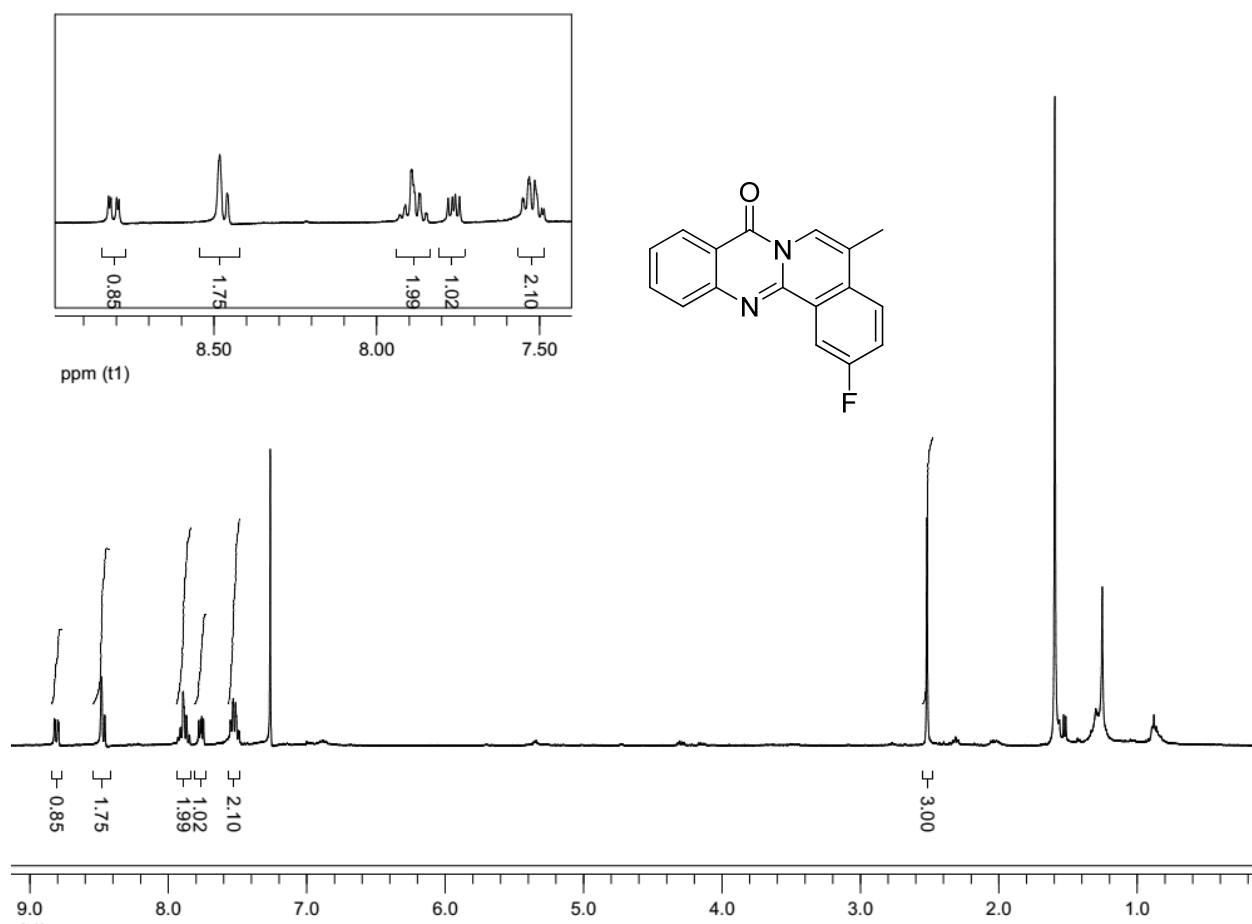

Fig. 7:  $^1\text{H}$  NMR spectra of compound **4b** ( $\text{CDCl}_3$ , 400 MHz)

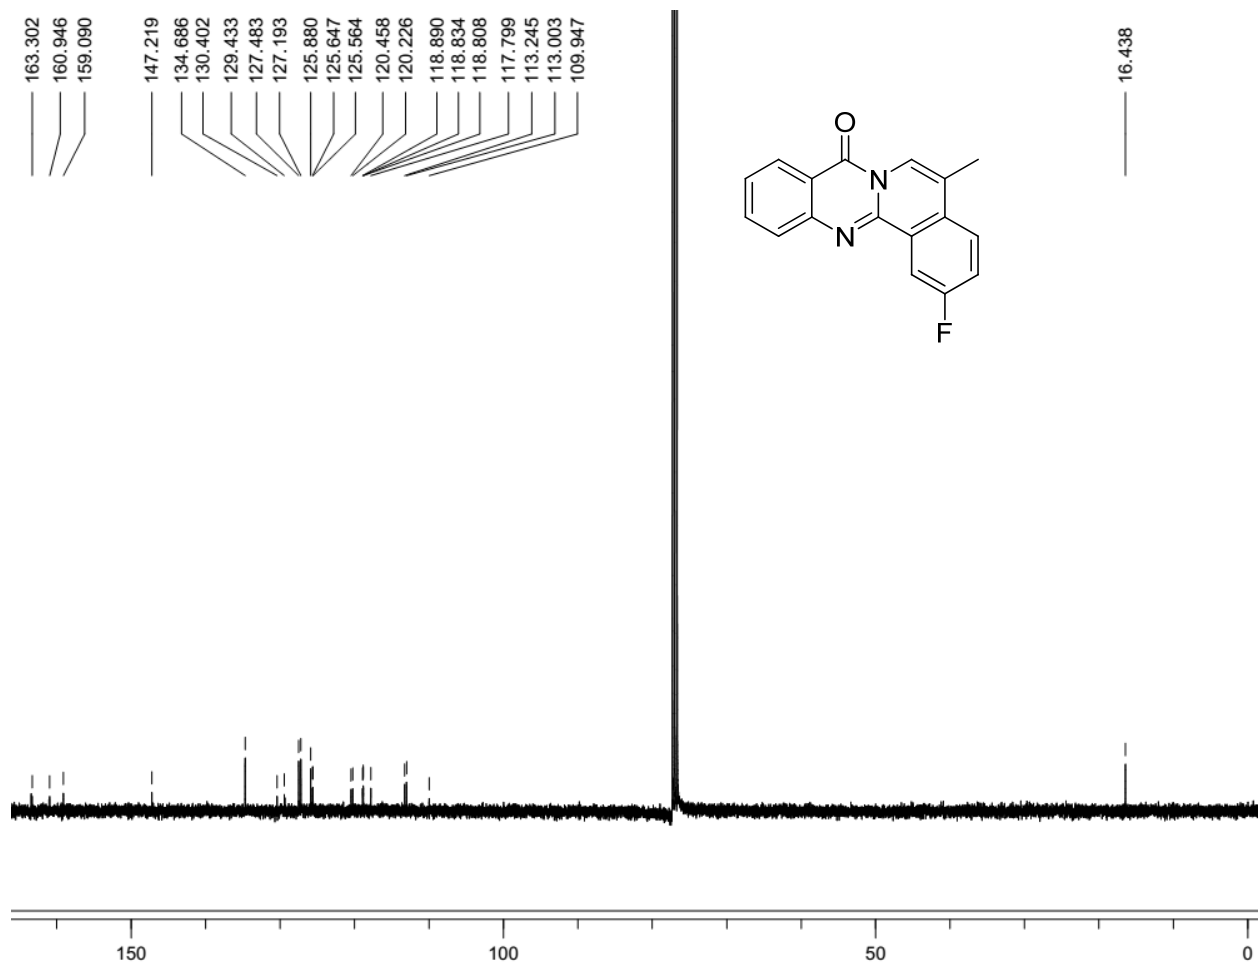

Fig. 8:  $^{13}\text{C}$  NMR spectra of compound **4b** ( $\text{CDCl}_3$ , 100 MHz)



Injection Date : Wed, 19. Feb. 2014  
 Sample Name : ILS-ARJ-5-2  
 Acq Operator : RADHA  
 Acq. Method : D:\chem32\1\DATA\180214-API 2014-02-18 16-41-22\API ->  
 Analysis Method : D:\CHEM32\_002\1\METHODS\API MKT.M  
 Method Info : Column : X-Terra RP18 250\*4.6mm, 5µm  
 Mobile phase: A) 0.1%TFA in Water B) ACN (gradient )  
 T/B%: 0/20, 3/20, 12/95, 23/95, 25/20, 30/20  
 Flow: 1.0 ml/min, Diluent: ME0H

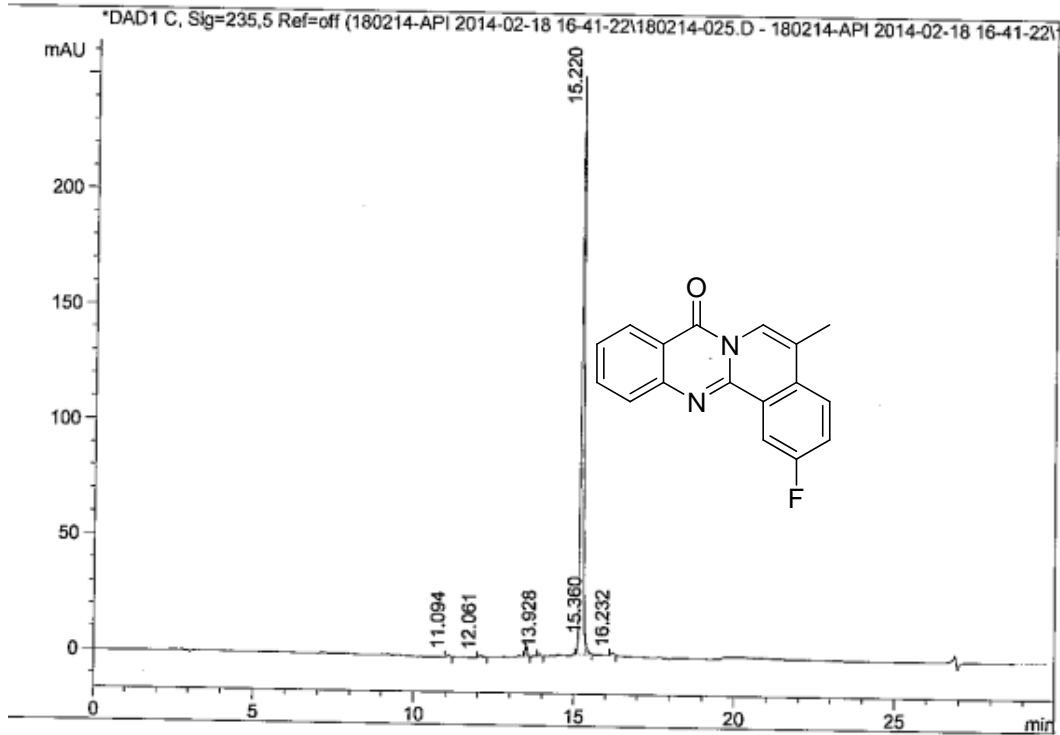

Signal 1: DAD1 C, Sig=235,5 Ref=off

| Peak # | RT [min] | Area     | Area % |
|--------|----------|----------|--------|
| 1      | 11.094   | 5.254    | 0.370  |
| 2      | 12.061   | 6.277    | 0.442  |
| 3      | 13.513   | 23.071   | 1.625  |
| 4      | 13.928   | 6.979    | 0.492  |
| 5      | 15.220   | 1350.562 | 95.117 |
| 6      | 15.360   | 21.910   | 1.543  |
| 7      | 16.232   | 5.846    | 0.412  |

*M. S. Ar*

Fig. 9: HPLC of compound 4b

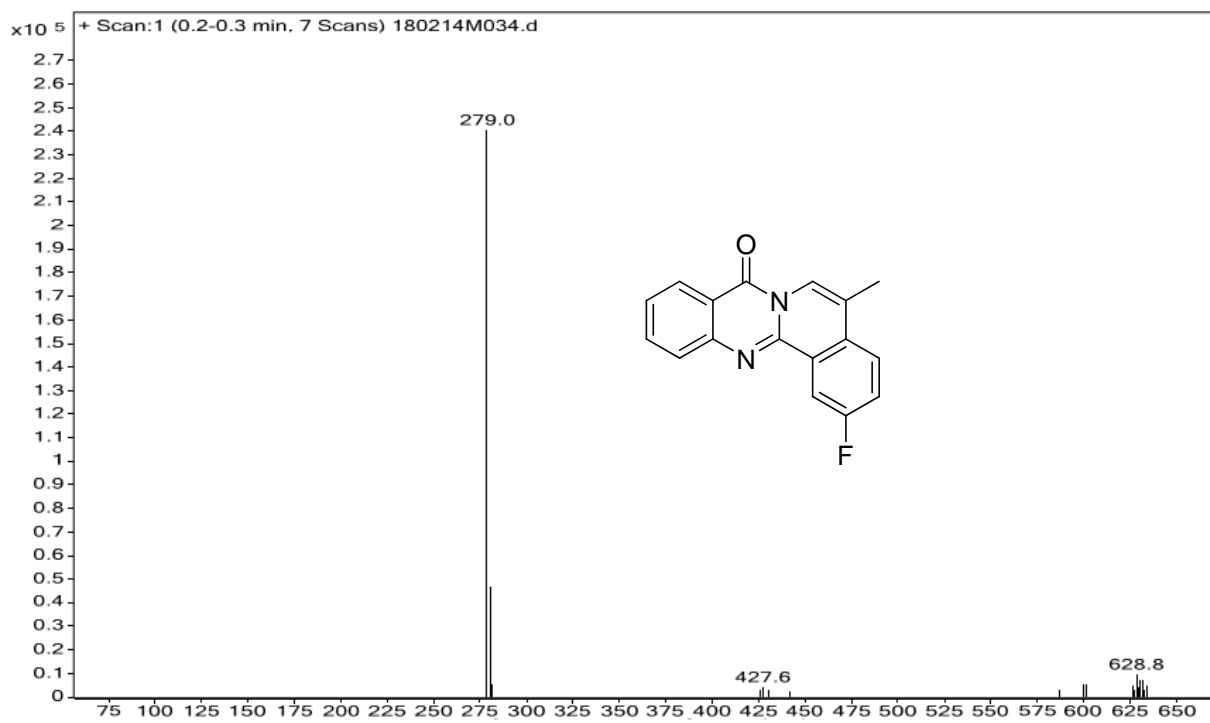

Fig. 10: Mass of compound **4b**

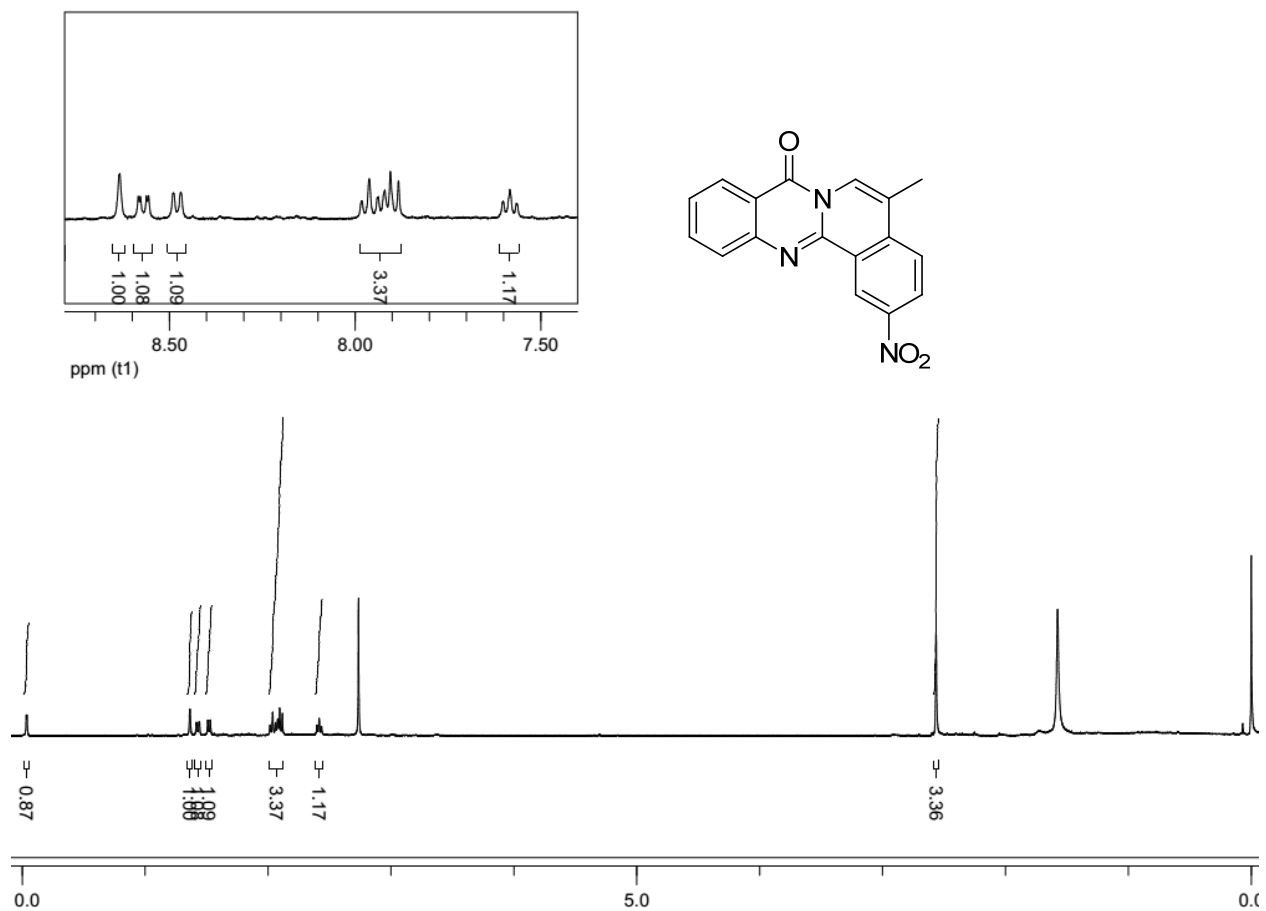

Fig. 11:  $^1\text{H}$  NMR spectra of compound **4c** ( $\text{CDCl}_3$ , 400 MHz)

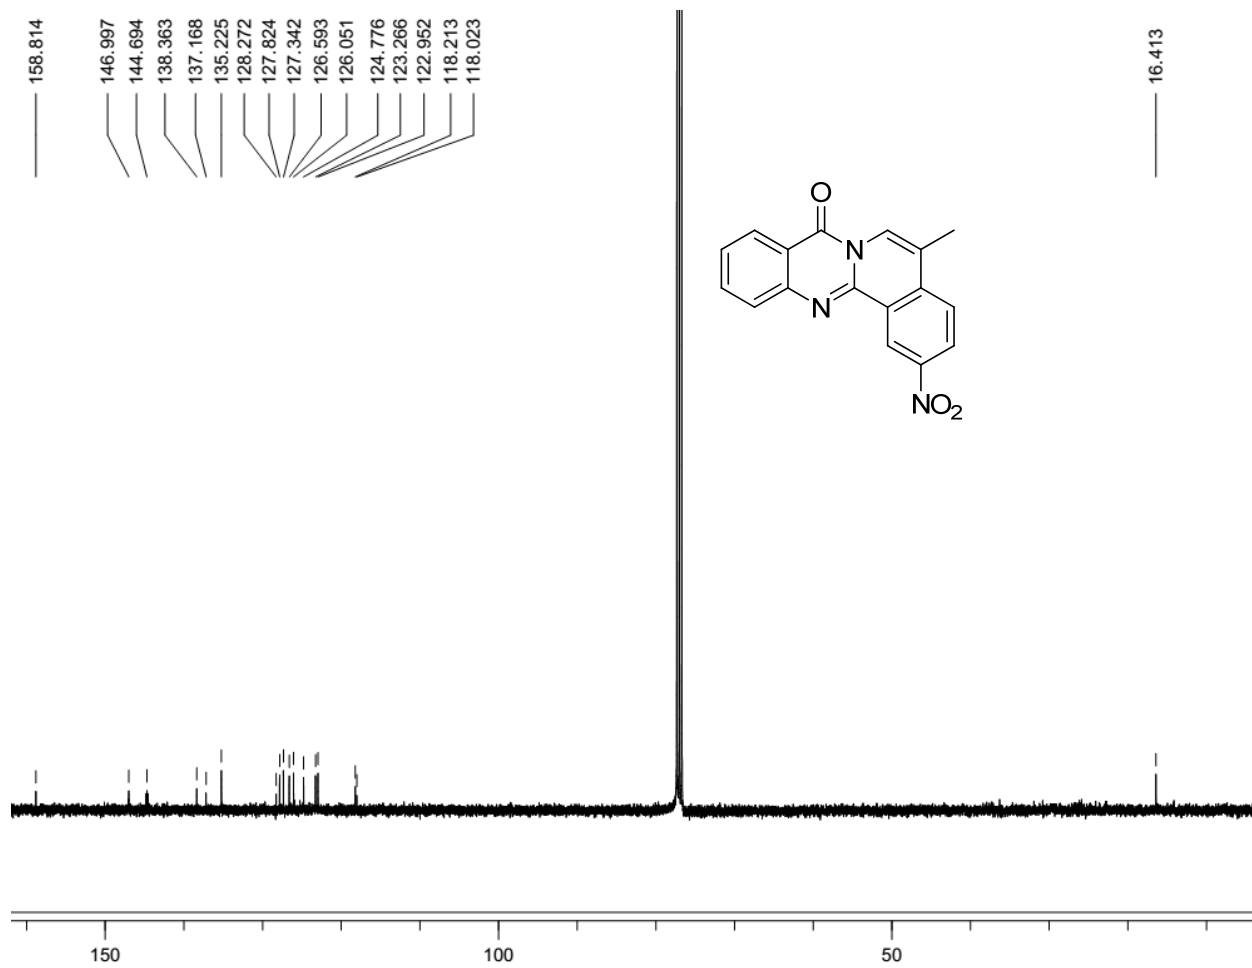

Fig. 12:  $^{13}\text{C}$  NMR spectra of compound 4c ( $\text{CDCl}_3$ , 100 MHz)

Injection Date : Wed, 19. Mar. 2014  
 Sample Name : ILS/ARJ/5/15  
 Acq Operator : RADHA  
 Acq. Method : D:\CHEM32\_002\1\METHODS\C-18 A20B80.M  
 Analysis Method : D:\CHEM32\_002\1\METHODS\C-18-A70B30G.M  
 Method Info : Column :Symmetry C-18 75\*4.6mm, 3.5µm  
 Mobile phase: A) 0.1% TFA in water,B) ACN (gradient)  
 T/B%:0/20,1/20,4/98,10/98,10.5/20,12/20.  
 FLOW:1.0ml/min Dil: ACN:Water(80:20)

Seq Line : 0  
 Location : Vial 24  
 Inj. No. : 0  
 Inj. Vol. : 0 µl

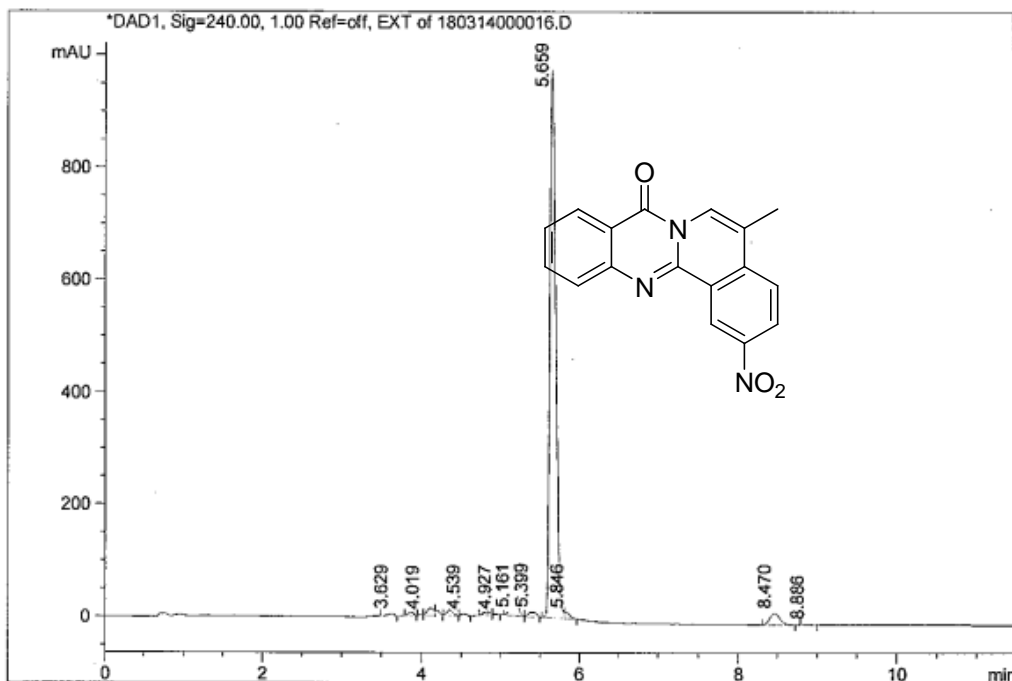

Signal 1: DAD1, Sig=240.00, 1.00 Ref=off, EXT

| Peak # | RT [min] | Area     | Area % |
|--------|----------|----------|--------|
| 1      | 3.629    | 25.202   | 0.416  |
| 2      | 3.873    | 23.804   | 0.393  |
| 3      | 4.019    | 4.807    | 0.079  |
| 4      | 4.119    | 71.525   | 1.180  |
| 5      | 4.192    | 25.839   | 0.426  |
| 6      | 4.361    | 41.430   | 0.684  |
| 7      | 4.539    | 12.341   | 0.204  |
| 8      | 4.825    | 29.262   | 0.483  |
| 9      | 4.927    | 6.569    | 0.108  |
| 10     | 5.161    | 24.979   | 0.354  |
| 11     | 5.399    | 48.567   | 0.801  |
| 12     | 5.659    | 5987.527 | 91.288 |
| 13     | 5.846    | 45.037   | 0.743  |
| 14     | 8.470    | 167.897  | 2.770  |
| 15     | 8.886    | 4.301    | 0.071  |

Fig. 13: HPLC of compound 4c

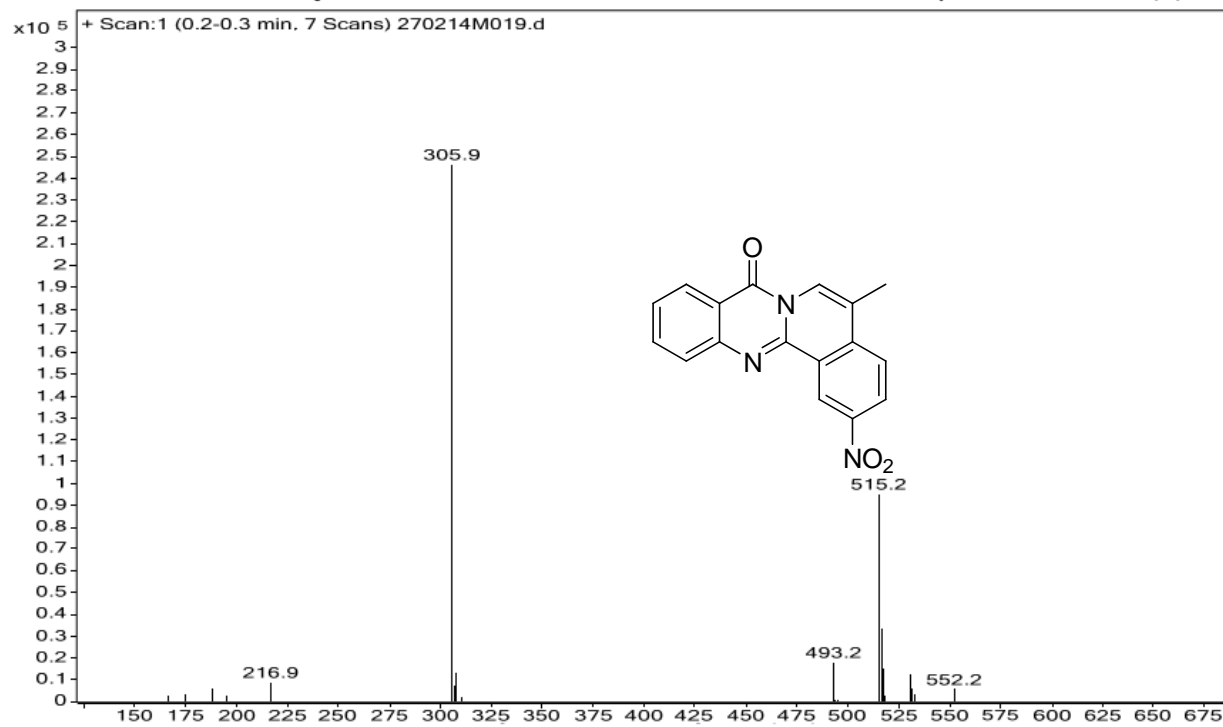

Fig. 14: Mass of compound **4c**

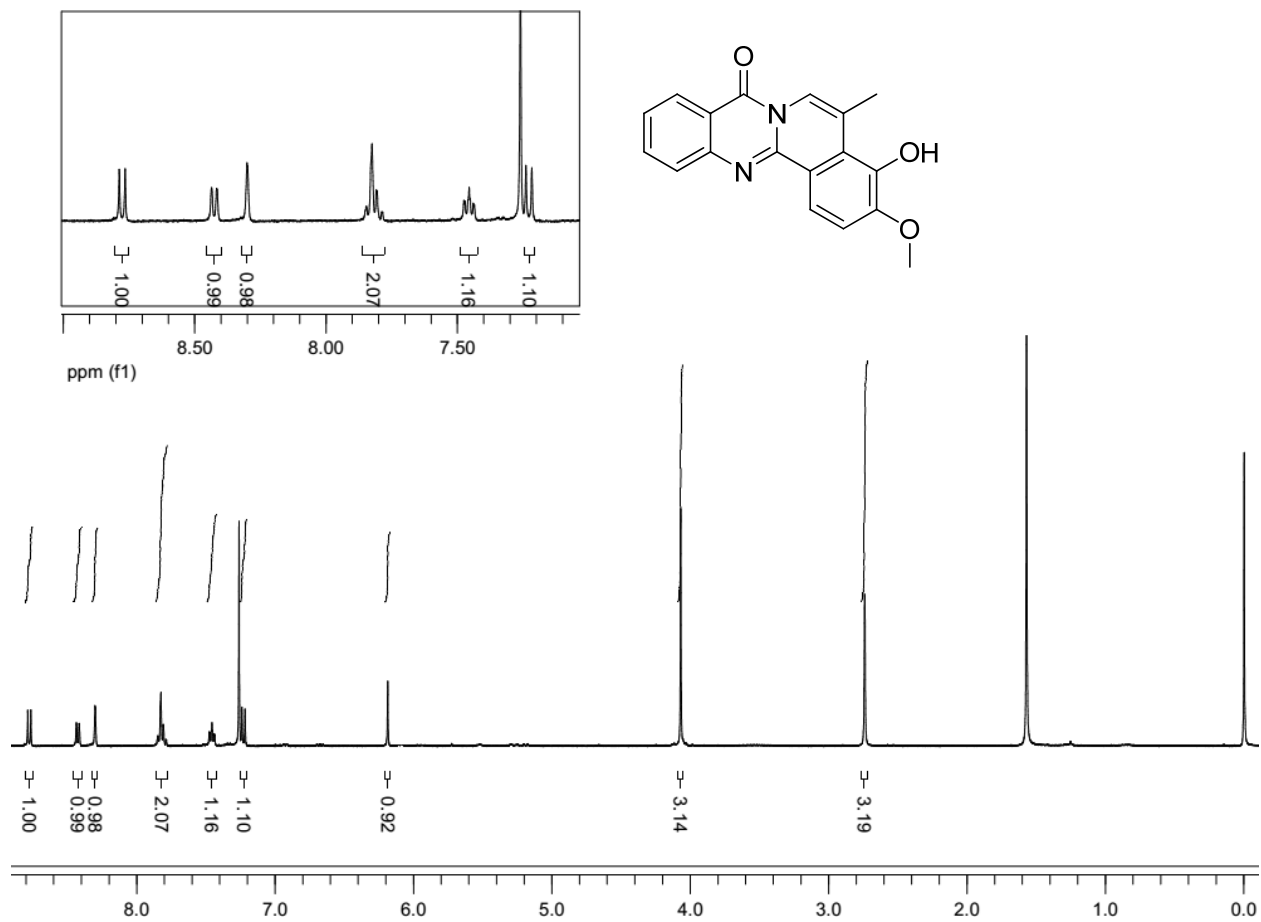

Fig. 15:  $^1\text{H}$  NMR spectra of compound **4d** ( $\text{CDCl}_3$ , 400 MHz)

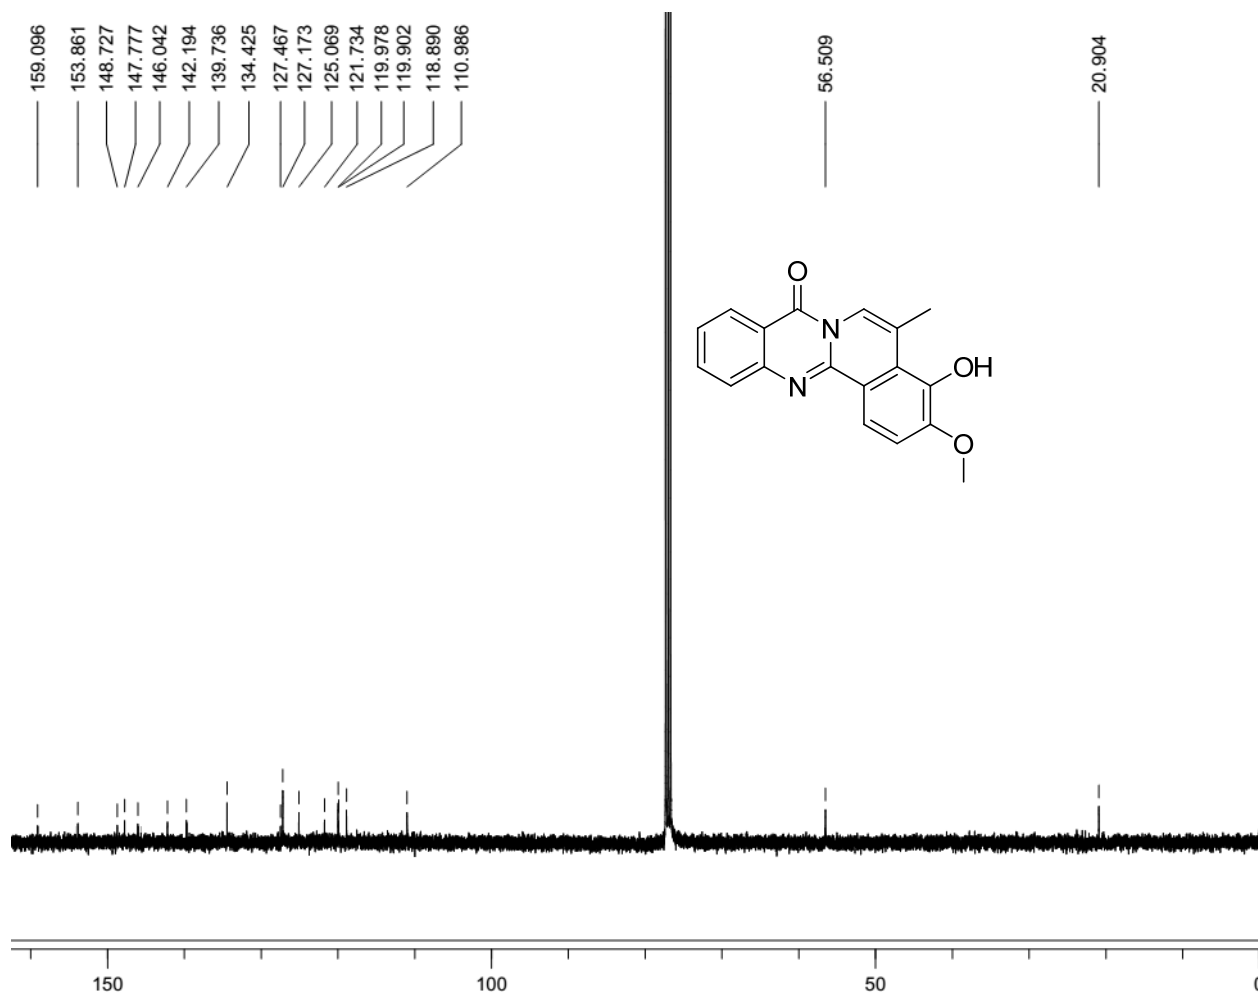

Fig. 16:  $^{13}\text{C}$  NMR spectra of compound **4d** ( $\text{CDCl}_3$ , 100 MHz)



Injection Date : Wed, 19. Mar. 2014  
 Sample Name : ILS/ARJ/5/14  
 Acq Operator : RADHA  
 Acq. Method : D:\CHEM32\_002\1\METHODS\C-18 A20B80.M  
 Analysis Method : D:\CHEM32\_002\1\METHODS\C-18-A70B30G.M  
 Method Info : Column :Symmetry C-18 75\*4.6mm, 3.5µm  
 Mobile phase: A) 0.1% TFA in water,B) ACN (gradient)  
 T/B%:0/20,1/20,4/98,10/98,10.5/20,12/20.  
 FLOW:1.0ml/min Dil: ACN:Water(80:20)

Seq Line : 0  
 Location : Vial 23  
 Inj. No. : 0  
 Inj. Vol. : 0 µl

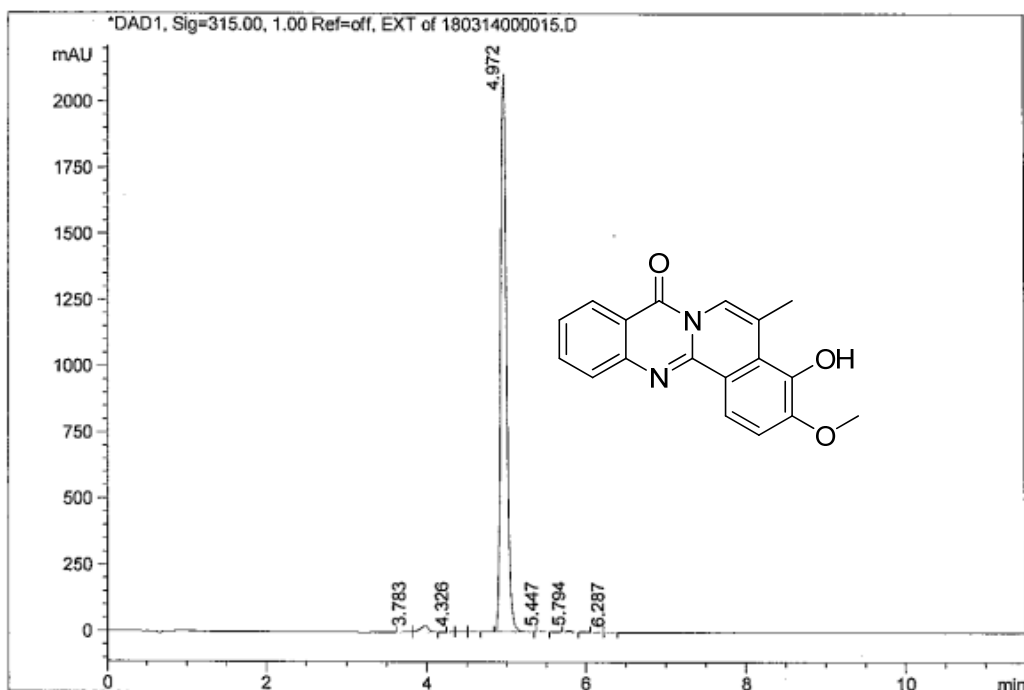

Signal 1: DAD1, Sig=315.00, 1.00 Ref=off, EXT

| Peak # | RT [min] | Area      | Area % |
|--------|----------|-----------|--------|
| 1      | 3.783    | 14.608    | 0.134  |
| 2      | 3.981    | 157.912   | 1.450  |
| 3      | 4.326    | 1.662     | 0.015  |
| 4      | 4.440    | 10.346    | 0.095  |
| 5      | 4.587    | 7.519     | 0.069  |
| 6      | 4.972    | 10664.799 | 97.961 |
| 7      | 5.447    | 4.873     | 0.045  |
| 8      | 5.794    | 20.334    | 0.187  |
| 9      | 6.140    | 2.189     | 0.020  |
| 10     | 6.287    | 2.564     | 0.024  |

*M*  
19/03/14

Fig. 17: HPLC of compound 4d

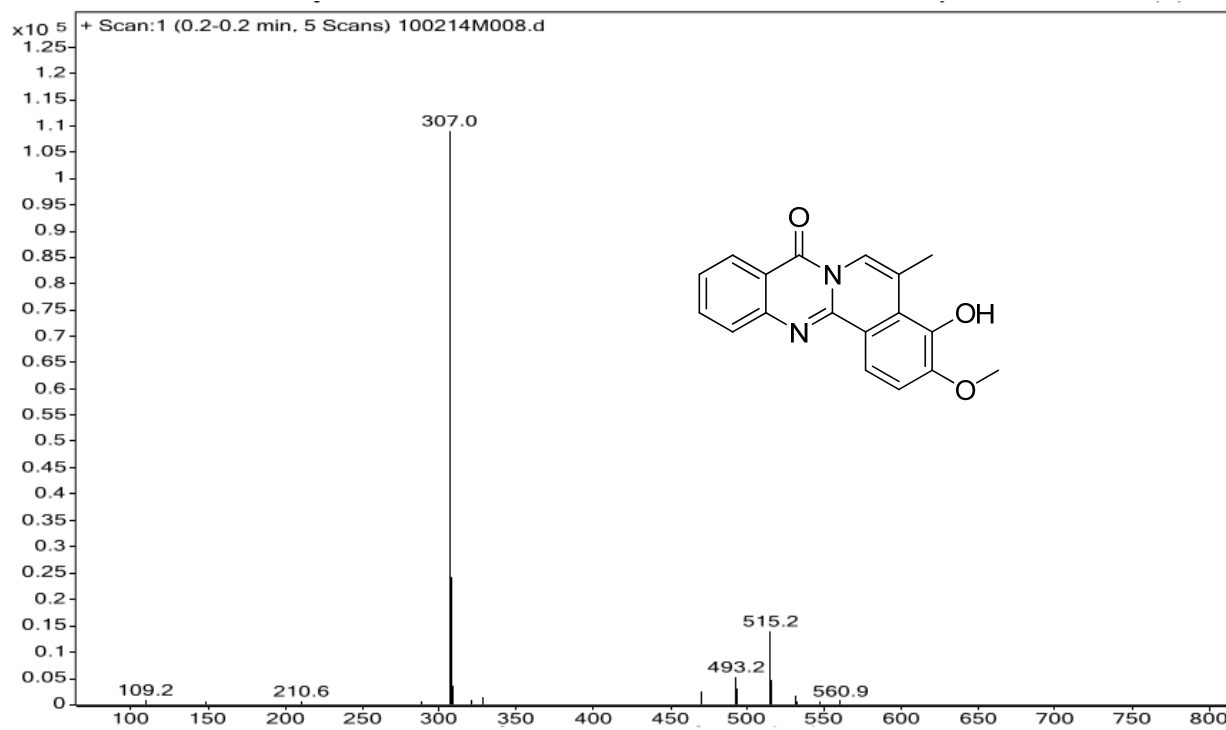

Fig. 18: Mass of compound **4d**

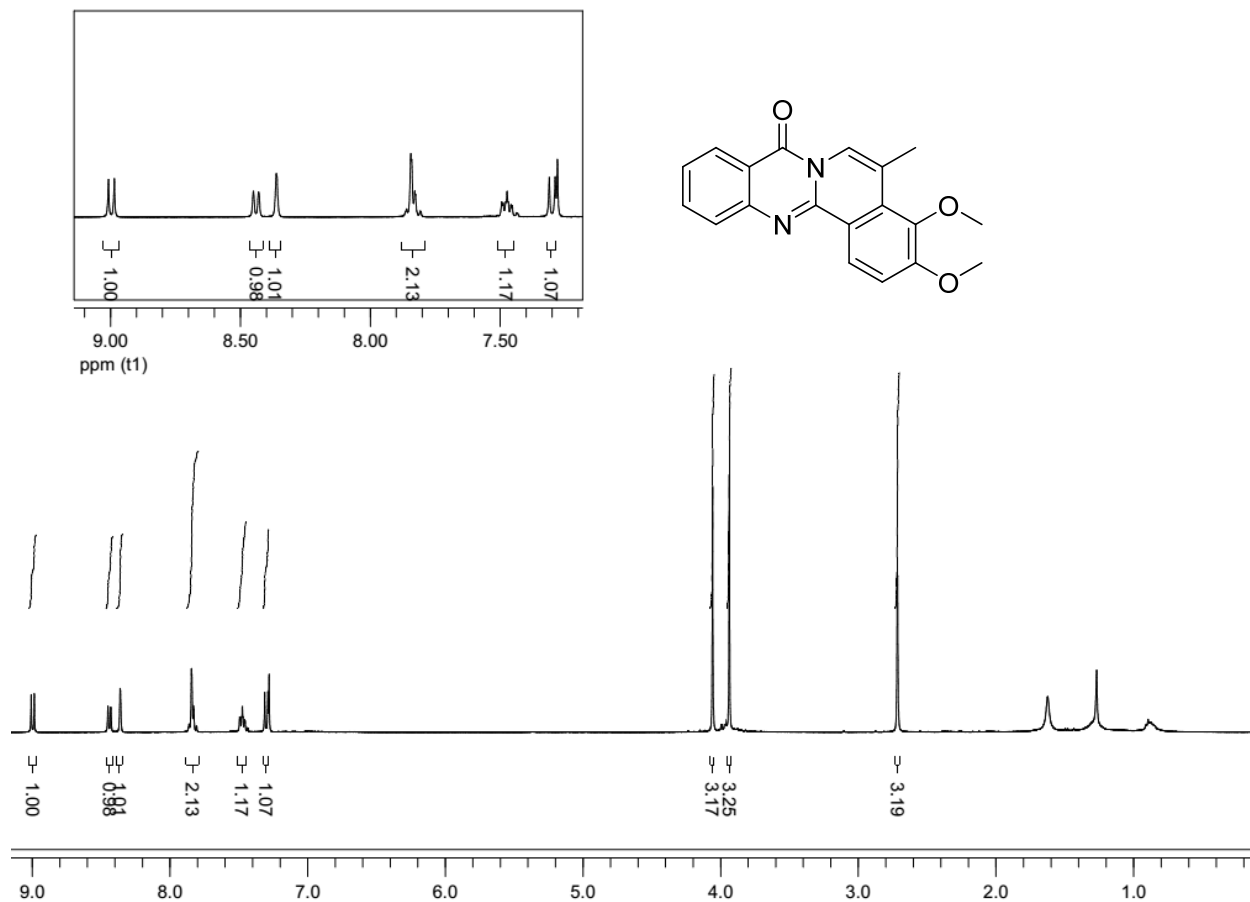

Fig. 19:  $^1\text{H}$  NMR spectra of compound **4e** ( $\text{CDCl}_3$ , 400 MHz)

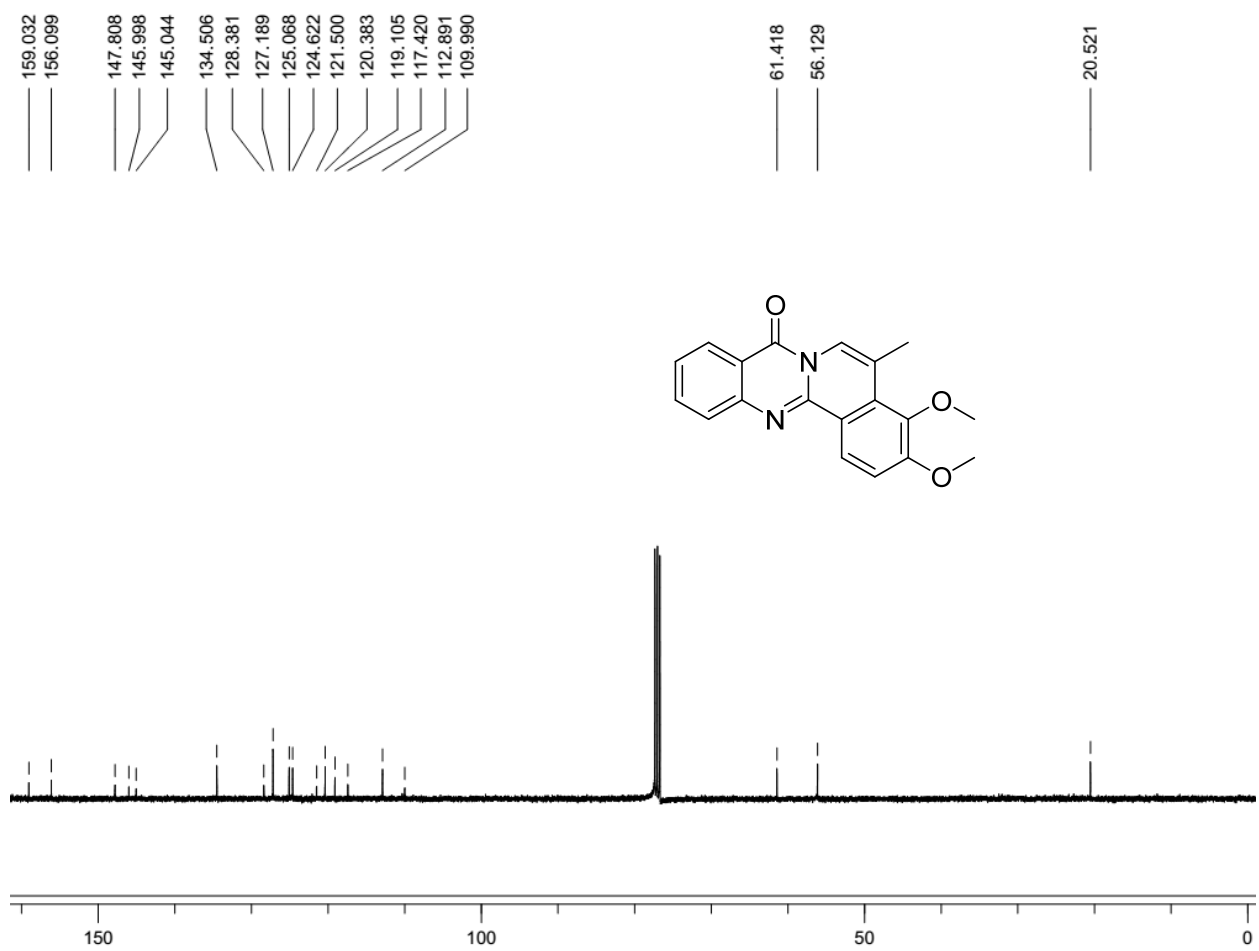

Fig. 20:  $^{13}\text{C}$  NMR spectra of compound **4e** ( $\text{CDCl}_3$ , 100 MHz)

## SAMPLE INFORMATION

|                                           |                                  |
|-------------------------------------------|----------------------------------|
| Sample Name: ILS/ARJ/5/11                 | Sample Set Name: 210214_1        |
| Sample Type: Unknown                      | Acq. Method Set: CFZ             |
| Vial: 36                                  | Processing Method: CFZ_PRO       |
| Injection #: 1                            | Channel Name: 290.0nm            |
| Injection Volume: 5.00 ul                 | Proc. Chnl. Descr.: PDA 290.0 nm |
| Run Time: 30.0 Minutes                    |                                  |
| Date Acquired: 2/22/2014 12:44:32 AM IST  |                                  |
| Date Processed: 2/24/2014 11:59:50 AM IST |                                  |

Column: X TERRA RP-18 250\*4.6mm 5µm  
 Mobile phase: A) 0.1% TFA in water B) ACN  
 T7%B: 0/20, 3/20, 12/95, 23/95, 25/20, 30/20  
 Flow: 1.0 ml /min, Diluent: ACN: WATER (80:20)

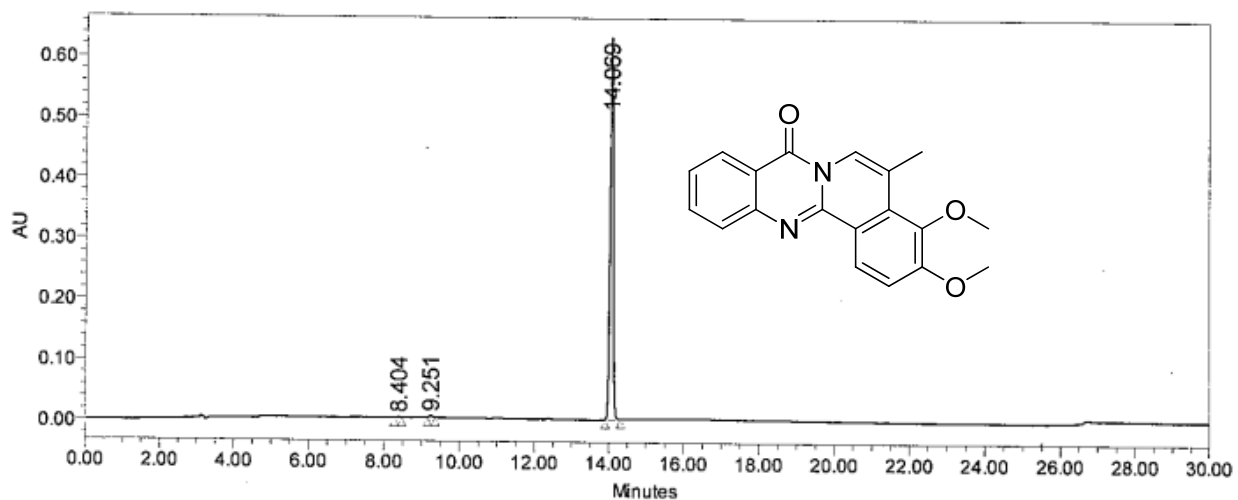

|   | RT     | Area    | % Area | Height |
|---|--------|---------|--------|--------|
| 1 | 8.404  | 6251    | 0.17   | 1008   |
| 2 | 9.251  | 18813   | 0.52   | 3239   |
| 3 | 14.069 | 3614887 | 99.31  | 628611 |

*M. G. G. G.*  
Analysed By

Fig. 21: HPLC of compound 4e

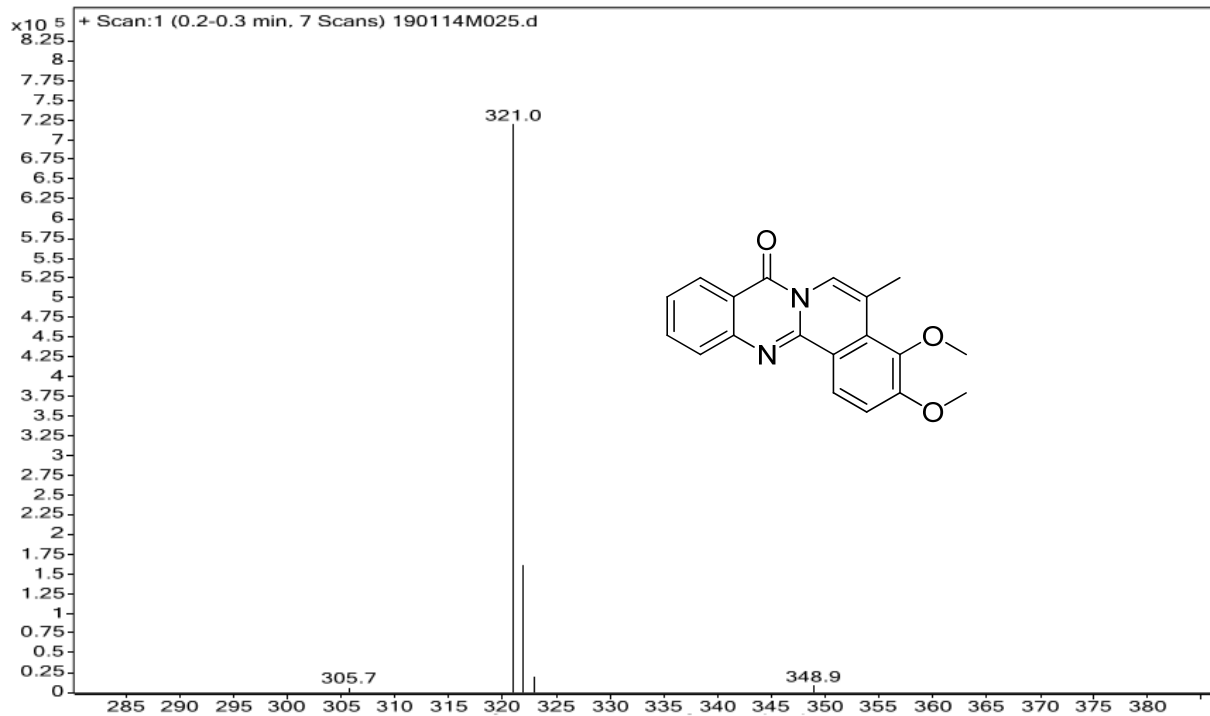

Fig. 22: Mass of compound **4e**

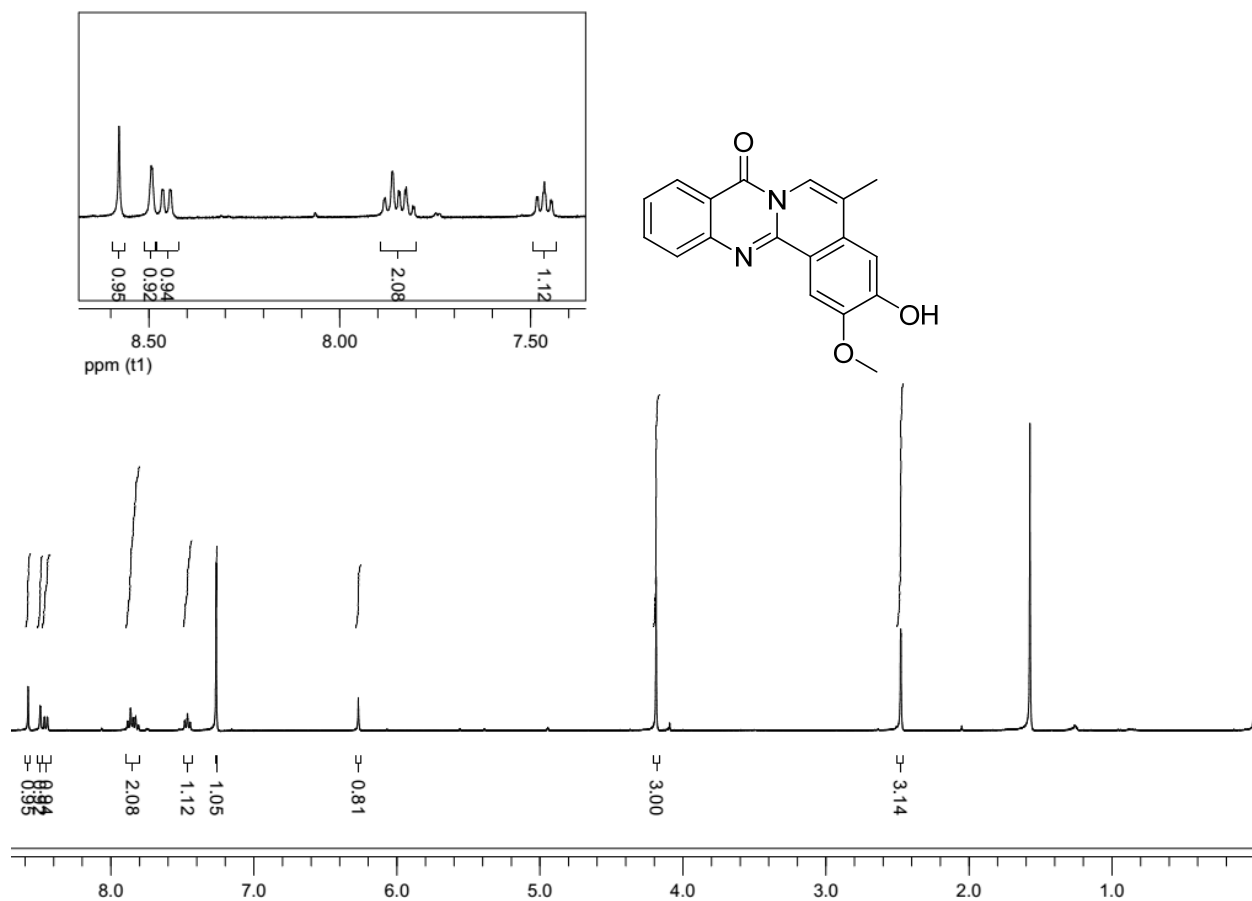

Fig. 23:  $^1\text{H}$  NMR spectra of compound **4f** (CDCl<sub>3</sub>, 400 MHz)

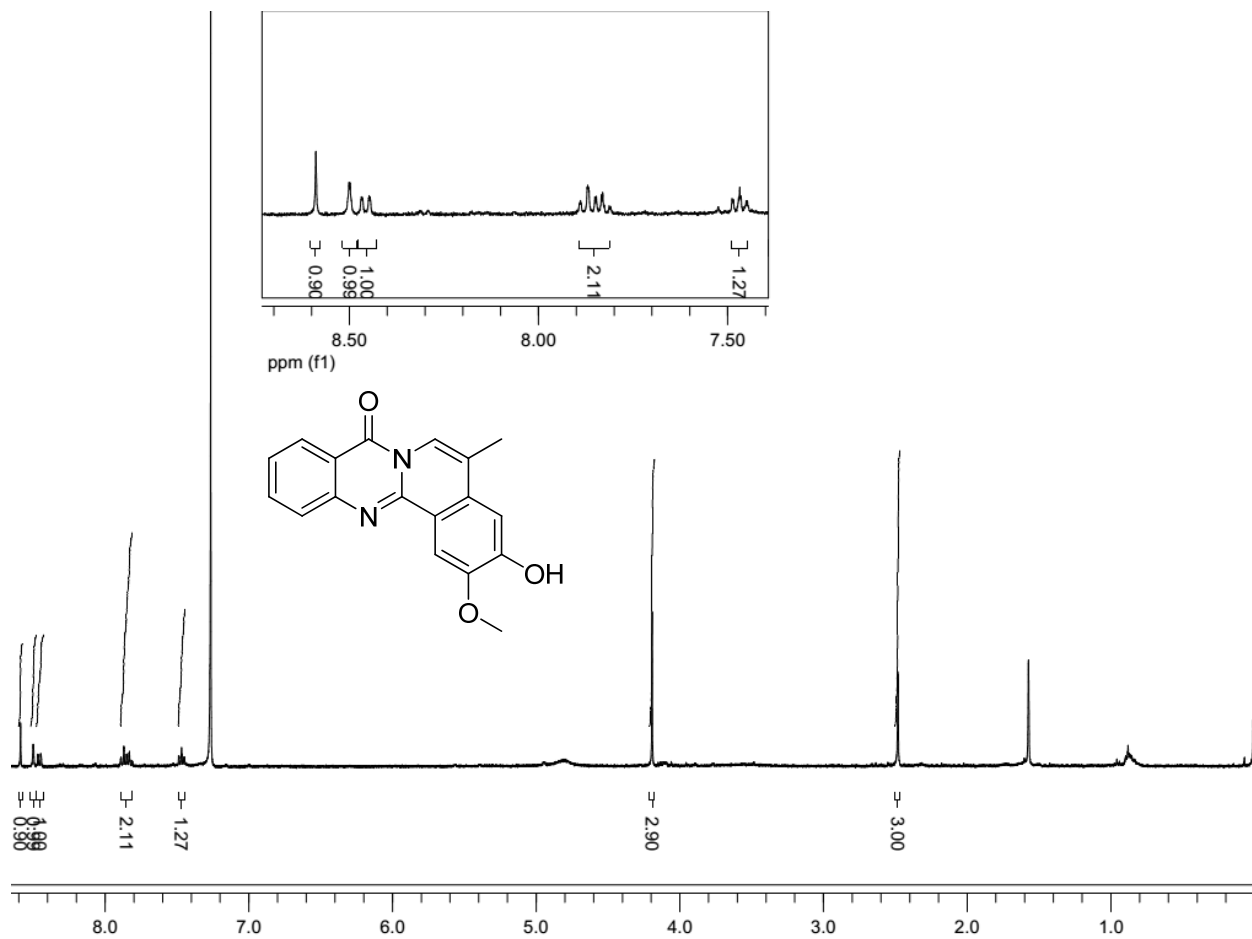

Fig. 24: D<sub>2</sub>O exchange spectra of compound **4f** (CDCl<sub>3</sub>, 400 MHz)



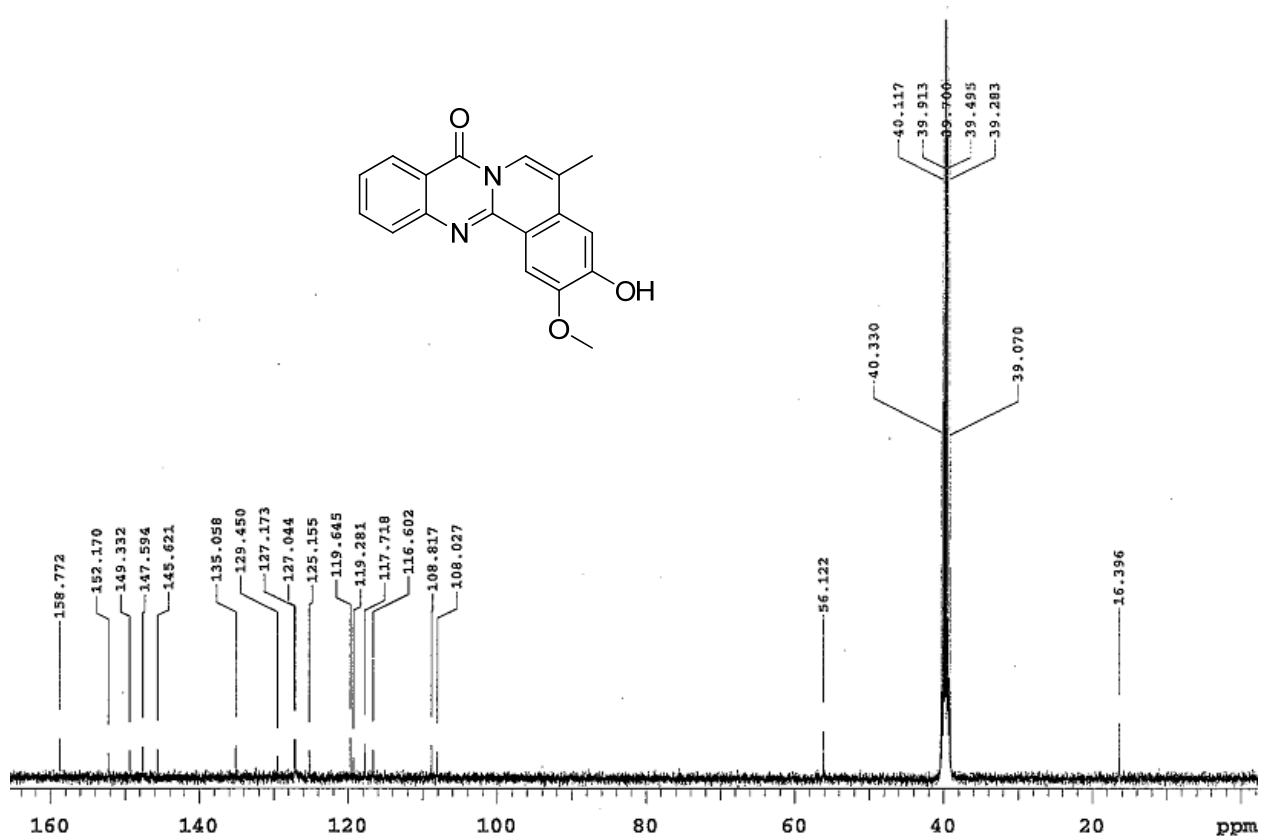

Fig. 25: <sup>13</sup>C NMR spectra of compound **4f** (DMSO-*d*<sub>6</sub>, 100 MHz)

|                   |                           |                     |              |
|-------------------|---------------------------|---------------------|--------------|
| Sample Name:      | ILS/ARJ/5/10              | Sample Set Name:    | 240214       |
| Sample Type:      | Unknown                   | Acq. Method Set:    | CFZ          |
| Vial:             | 35                        | Processing Method:  | CFZ_PRO      |
| Injection #:      | 1                         | Channel Name:       | 280.0nm      |
| Injection Volume: | 5.00 ul                   | Proc. Chnl. Descr.: | PDA 280.0 nm |
| Run Time:         | 30.0 Minutes              |                     |              |
| Date Acquired:    | 2/24/2014 11:37:36 AM IST |                     |              |
| Date Processed:   | 2/24/2014 12:51:16 PM IST |                     |              |

Column: X TERRA RP-18 250\*4.6mm 5µm  
 Mobile phase: A) 0.1% TFA in water B) ACN  
 T/%B: 0/20, 3/20, 12/95, 23/95, 25/20, 30/20  
 Flow: 1.0 ml /min, Diluent: ACN: WATER (80:20)

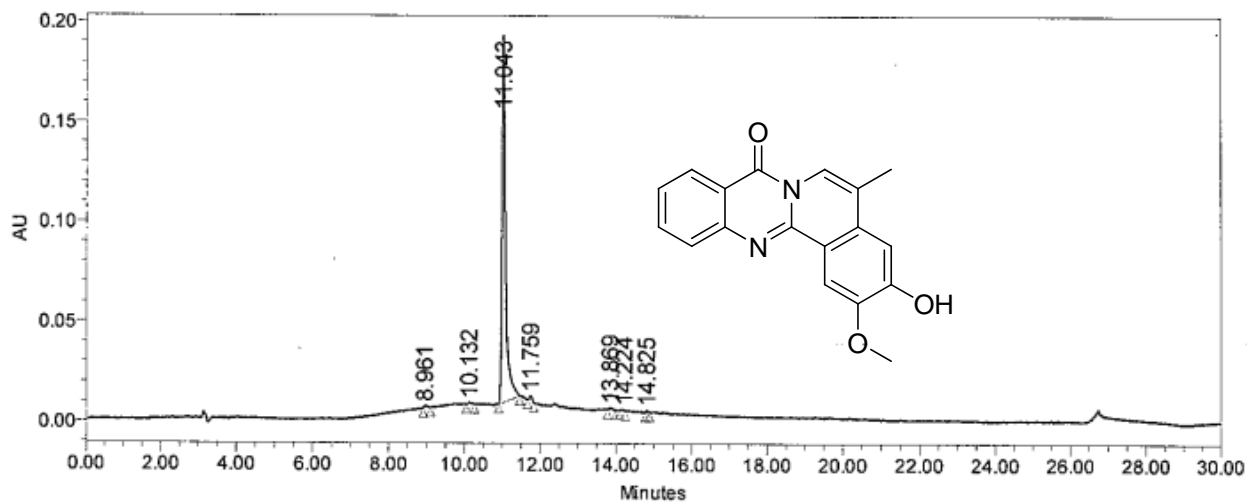

|   | RT     | Area    | % Area | Height |
|---|--------|---------|--------|--------|
| 1 | 8.961  | 7878    | 0.63   | 1231   |
| 2 | 10.132 | 6741    | 0.54   | 1037   |
| 3 | 11.043 | 1212492 | 96.38  | 183725 |
| 4 | 11.759 | 13554   | 1.08   | 2704   |
| 5 | 13.869 | 8926    | 0.71   | 1238   |
| 6 | 14.224 | 5084    | 0.40   | 843    |
| 7 | 14.825 | 3320    | 0.26   | 1082   |

*M*  
 24/02/14  
 Analysed By

Fig. 26: HPLC of compound 4f

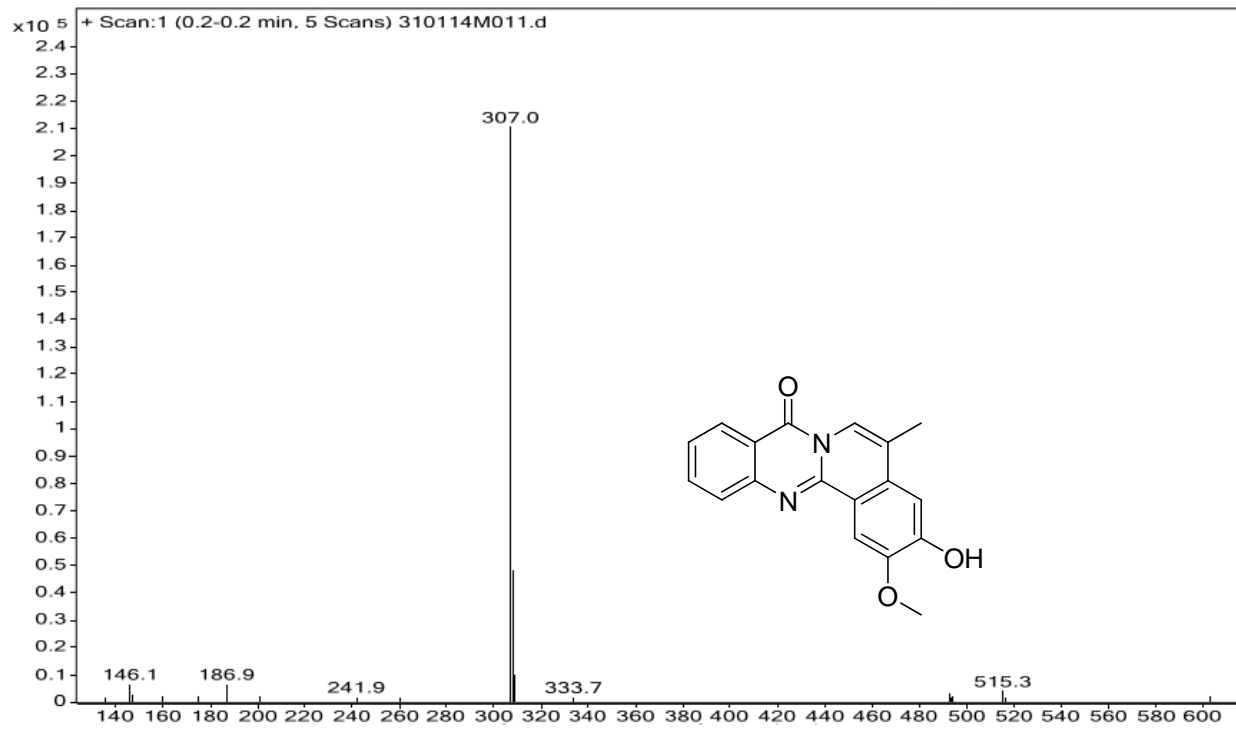

Fig. 27: Mass of compound **4f**

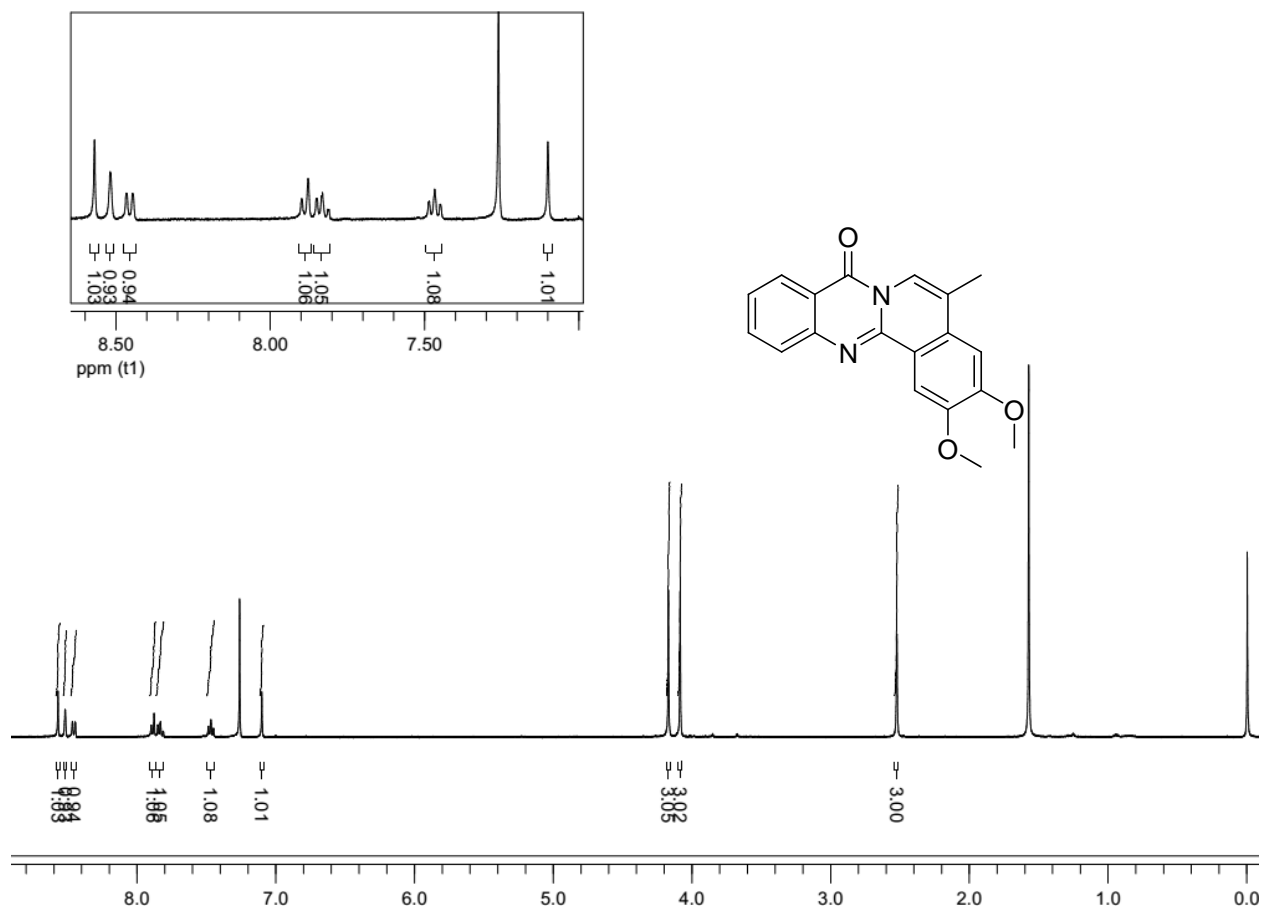

Fig. 28:  $^1\text{H}$  NMR spectra of compound **4g** ( $\text{CDCl}_3$ , 400 MHz)

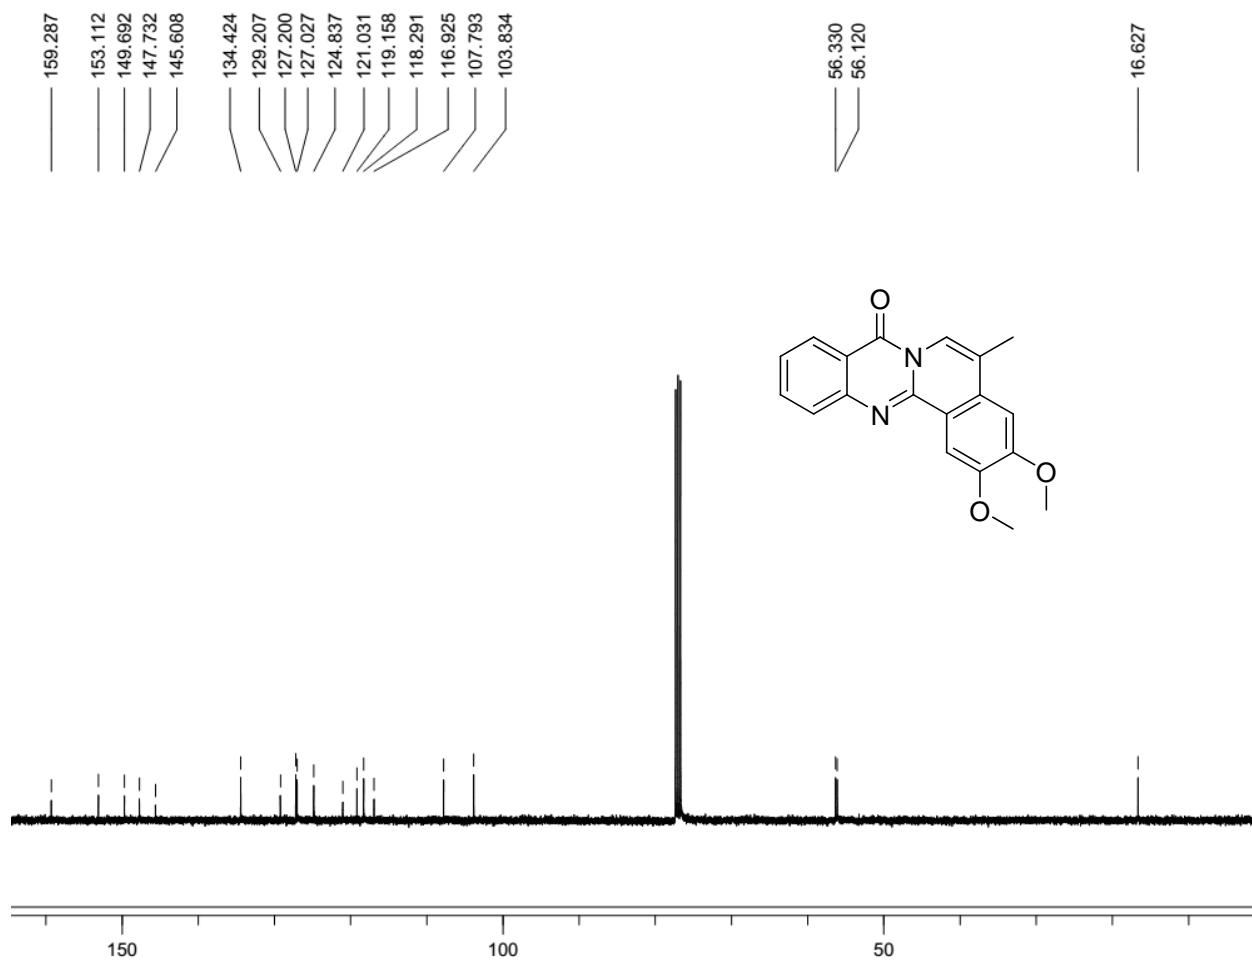

Fig. 29:  $^{13}\text{C}$  NMR spectra of compound **4g** ( $\text{CDCl}_3$ , 100 MHz)

## SAMPLE INFORMATION

|                                           |                                  |
|-------------------------------------------|----------------------------------|
| Sample Name: ILS/ARJ/5/3                  | Sample Set Name: 210214_1        |
| Sample Type: Unknown                      | Acq. Method Set: CFZ             |
| Vial: 28                                  | Processing Method: CFZ_PRO       |
| Injection #: 1                            | Channel Name: 275.0nm            |
| Injection Volume: 5.00 ul                 | Proc. Chnl. Descr.: PDA 275.0 nm |
| Run Time: 30.0 Minutes                    |                                  |
| Date Acquired: 2/21/2014 7:58:58 PM IST   |                                  |
| Date Processed: 2/24/2014 11:38:42 AM IST |                                  |

Column: X TERRA RP-18 250\*4.6mm 5µm  
 Mobile phase: A) 0.1% TFA in water B) ACN  
 T/%B: 0/20, 3/20, 12/95, 23/95, 25/20, 30/20  
 Flow: 1.0 ml /min, Diluent: ACN: WATER (80:20)

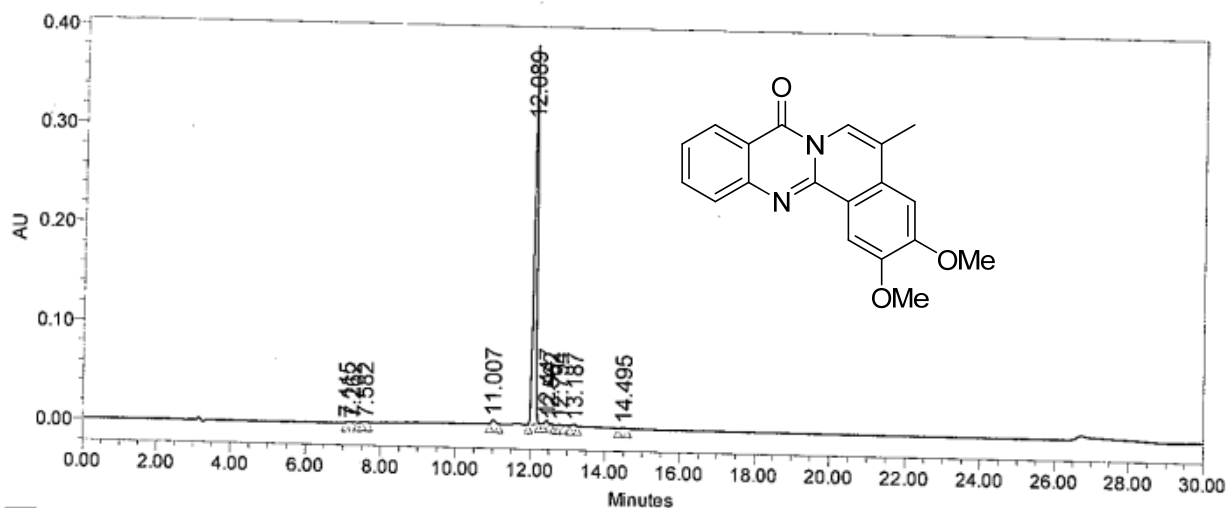

|    | RT     | Area    | % Area | Height |
|----|--------|---------|--------|--------|
| 1  | 7.115  | 6667    | 0.32   | 901    |
| 2  | 7.262  | 3501    | 0.17   | 851    |
| 3  | 7.582  | 5312    | 0.25   | 819    |
| 4  | 11.007 | 27257   | 1.29   | 4274   |
| 5  | 12.089 | 2011708 | 95.33  | 381742 |
| 6  | 12.447 | 21684   | 1.03   | 4054   |
| 7  | 12.562 | 5996    | 0.28   | 1158   |
| 8  | 12.794 | 6958    | 0.33   | 1533   |
| 9  | 13.187 | 11476   | 0.54   | 1760   |
| 10 | 14.495 | 9621    | 0.46   | 1371   |

*M. J. Lopez*  
Analysed By

Fig. 30: HPLC of compound **4g**

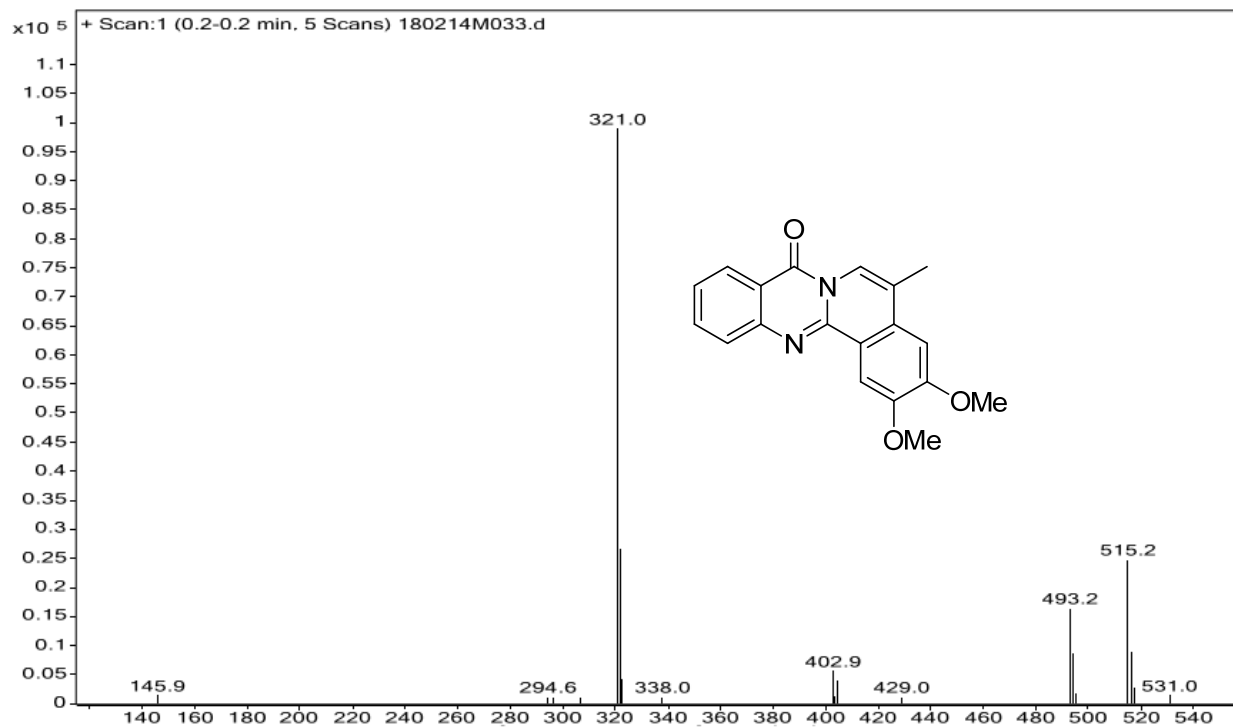

Fig. 31: Mass of compound **4g**

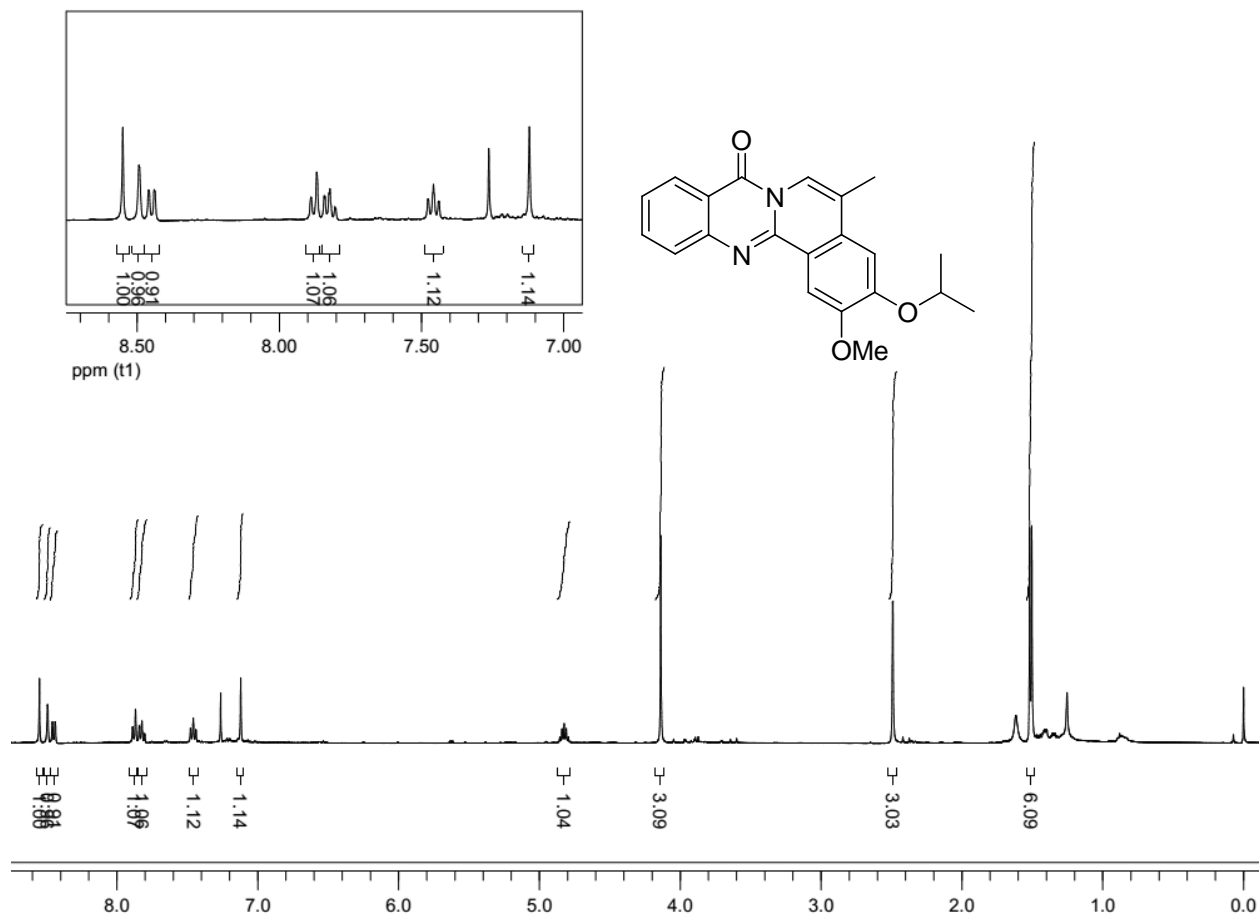

Fig. 32:  $^1\text{H}$  NMR spectra of compound **4h** ( $\text{CDCl}_3$ , 400 MHz)



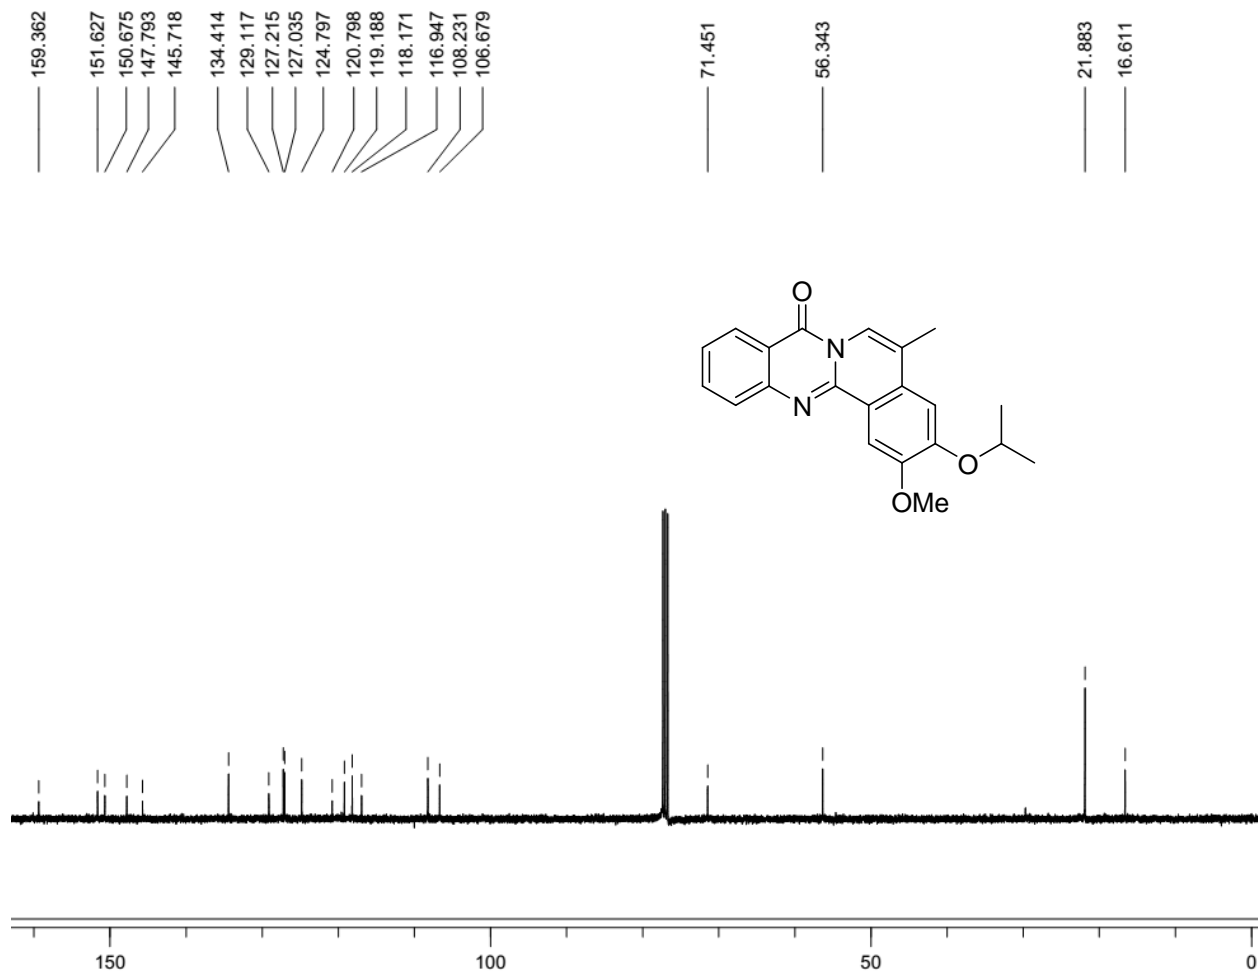

Fig. 33:  $^{13}\text{C}$  NMR spectra of compound **4h** ( $\text{CDCl}_3$ , 100 MHz)

### SAMPLE INFORMATION

|                                           |              |                     |              |
|-------------------------------------------|--------------|---------------------|--------------|
| Sample Name:                              | ILS/ARJ/5/9  | Sample Set Name:    | 210214_1     |
| Sample Type:                              | Unknown      | Acq. Method Set:    | CFZ          |
| Vial:                                     | 34           | Processing Method:  | CFZ_PRO      |
| Injection #:                              | 1            | Channel Name:       | 280.0nm      |
| Injection Volume:                         | 5.00 ul      | Proc. Chnl. Descr.: | PDA 280.0 nm |
| Run Time:                                 | 30.0 Minutes |                     |              |
| Date Acquired: 2/21/2014 11:33:12 PM IST  |              |                     |              |
| Date Processed: 2/24/2014 11:52:31 AM IST |              |                     |              |

Column: X TERRA RP-18 250\*4.6mm 5µm  
 Mobile phase: A) 0.1% TFA in water B) ACN  
 T/%B: 0/20, 3/20, 12/95, 23/95, 25/20, 30/20  
 Flow: 1.0 ml/min, Diluent: ACN: WATER (80:20)

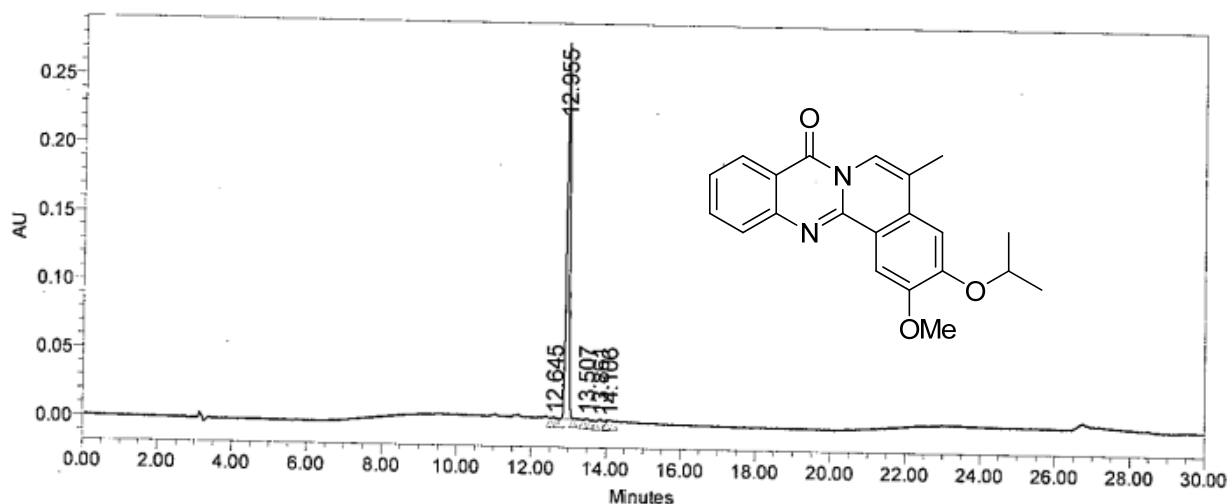

|   | RT     | Area    | % Area | Height |
|---|--------|---------|--------|--------|
| 1 | 12.645 | 7085    | 0.47   | 1130   |
| 2 | 12.955 | 1469317 | 97.64  | 274357 |
| 3 | 13.507 | 7735    | 0.51   | 1525   |
| 4 | 13.861 | 13652   | 0.91   | 1656   |
| 5 | 14.106 | 6975    | 0.46   | 1150   |

*M. Z. 2/24/14*  
 Analysed By

Fig. 34: HPLC of compound **4h**

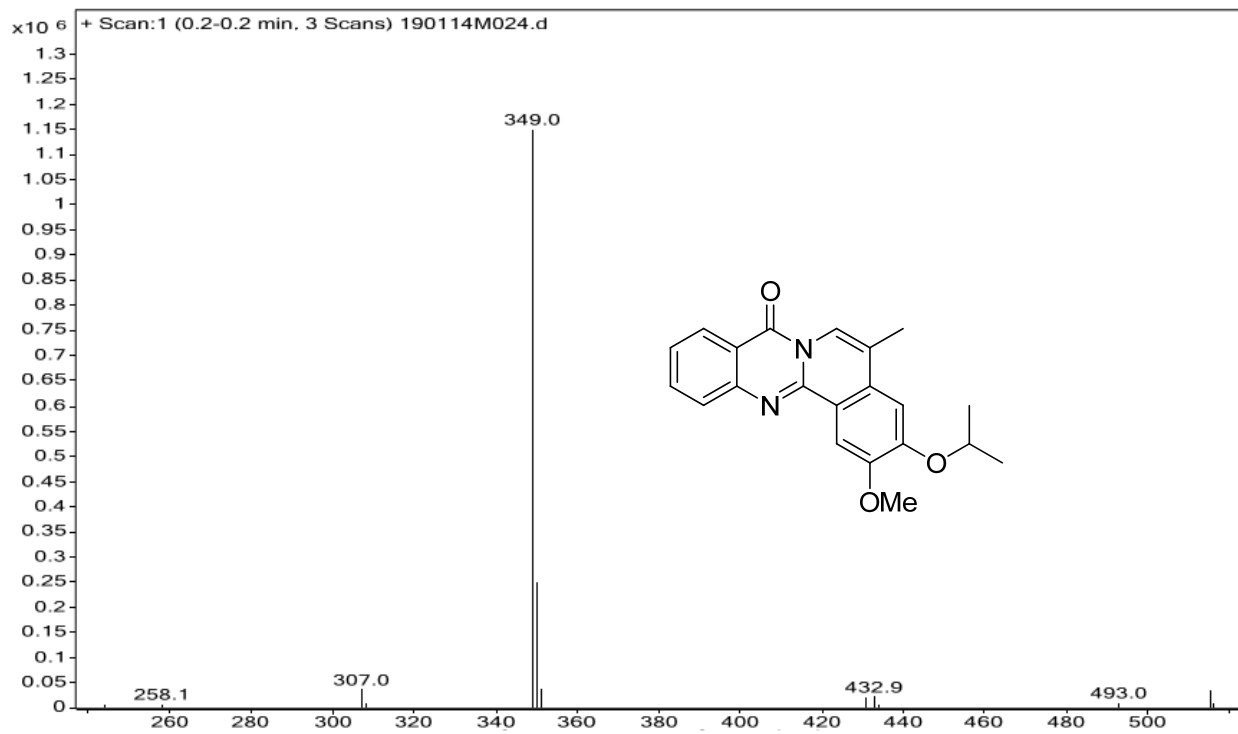

Fig. 35: Mass of compound **4h**

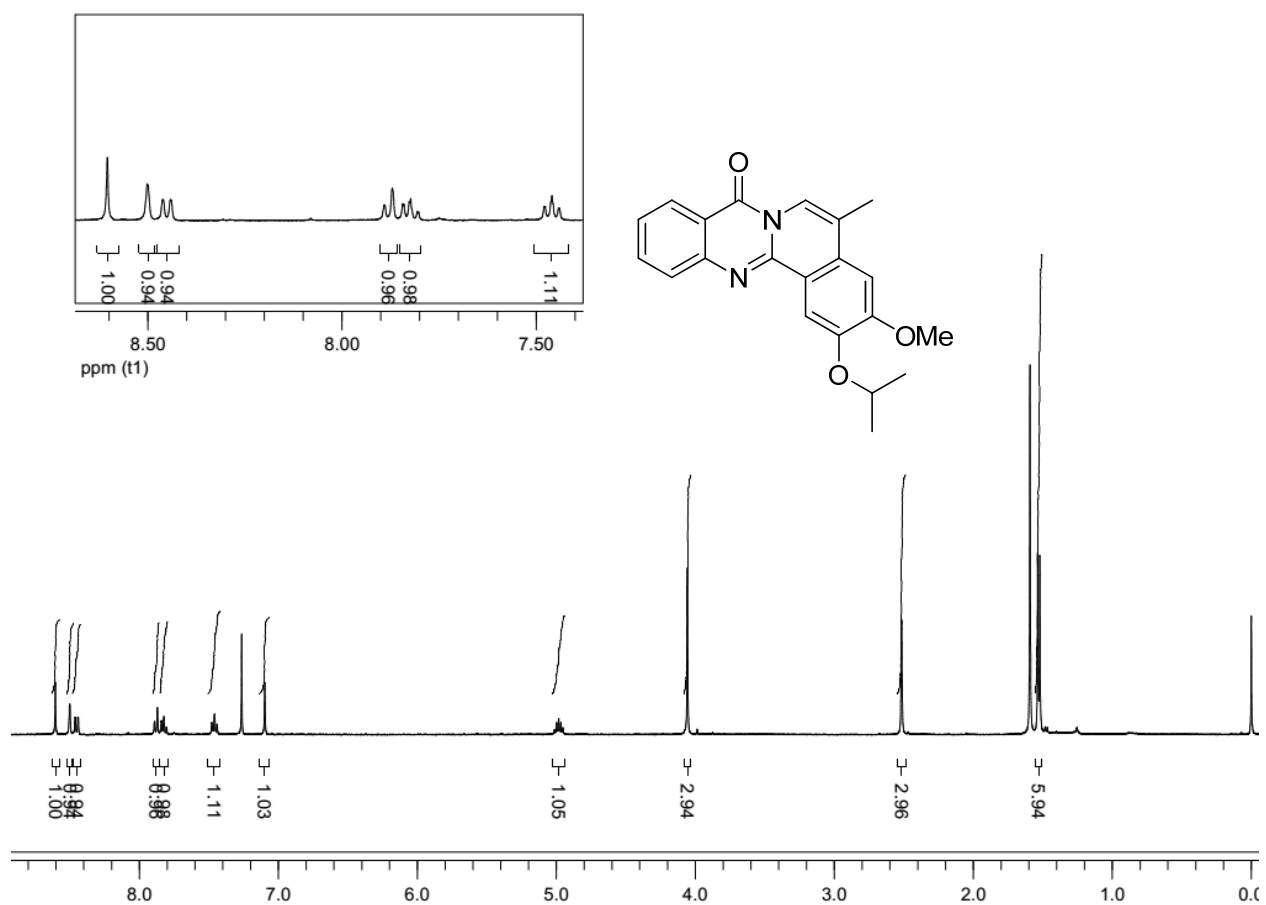

Fig. 36: <sup>1</sup>H NMR spectra of compound **4i** (CDCl<sub>3</sub>, 400 MHz)

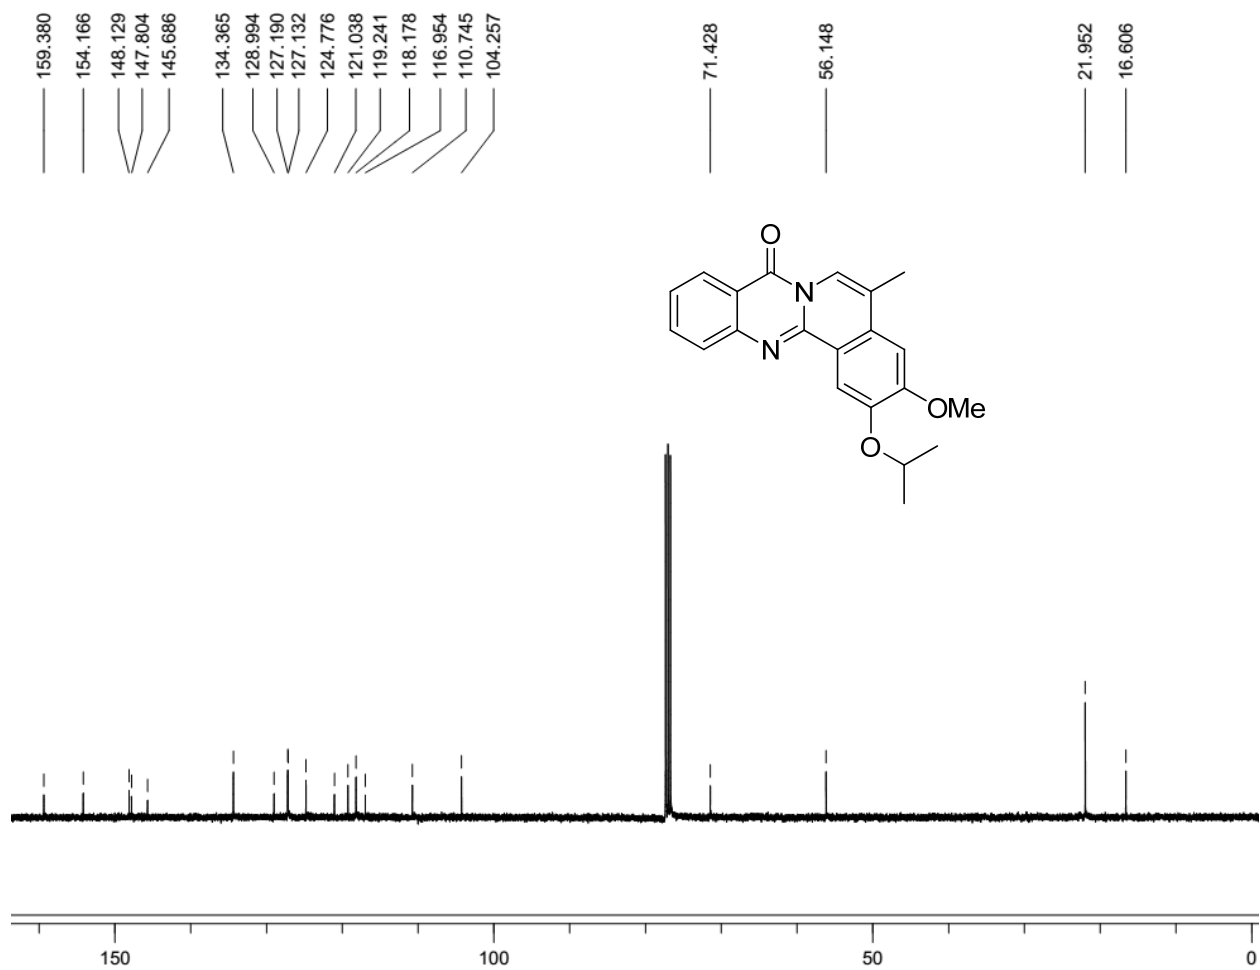

Fig. 37:  $^{13}\text{C}$  NMR spectra of compound **4i** ( $\text{CDCl}_3$ , 100 MHz)

|                   |                           |                     |              |
|-------------------|---------------------------|---------------------|--------------|
| Sample Name:      | ILS/ARJ/5/7               | Sample Set Name:    | 210214_1     |
| Sample Type:      | Unknown                   | Acq. Method Set:    | CFZ          |
| Vial:             | 32                        | Processing Method:  | CFZ_PRO      |
| Injection #:      | 1                         | Channel Name:       | 280.0nm      |
| Injection Volume: | 5.00 ul                   | Proc. Chnl. Descr.: | PDA 280.0 nm |
| Run Time:         | 30.0 Minutes              |                     |              |
| Date Acquired:    | 2/21/2014 10:21:46 PM IST |                     |              |
| Date Processed:   | 2/24/2014 11:48:10 AM IST |                     |              |

Column: X TERRA RP-18 250\*4.6mm 5µm  
 Mobile phase: A) 0.1% TFA in water B) ACN  
 T/%B: 0/20, 3/20, 12/95, 23/95, 25/20, 30/20  
 Flow: 1.0 ml/min, Diluent: ACN: WATER (80:20)

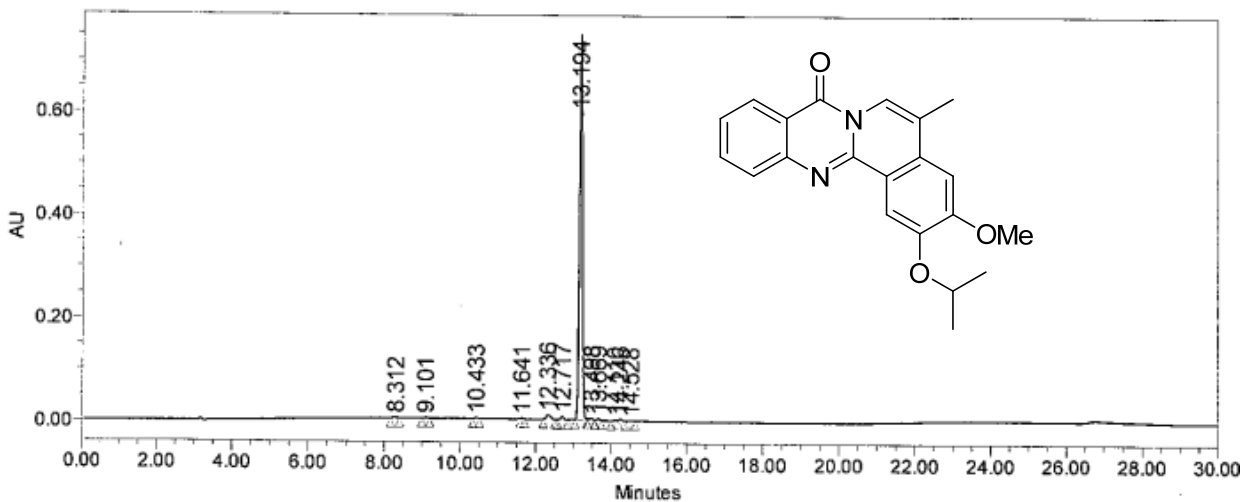

|    | RT     | Area    | % Area | Height |
|----|--------|---------|--------|--------|
| 1  | 8.312  | 13314   | 0.32   | 2010   |
| 2  | 9.101  | 12744   | 0.31   | 2054   |
| 3  | 10.433 | 12741   | 0.31   | 2338   |
| 4  | 11.641 | 5357    | 0.13   | 1433   |
| 5  | 12.336 | 73027   | 1.76   | 8790   |
| 6  | 12.717 | 39457   | 0.95   | 7038   |
| 7  | 13.194 | 3905451 | 94.32  | 744484 |
| 8  | 13.498 | 15985   | 0.39   | 3020   |
| 9  | 13.669 | 17349   | 0.42   | 3161   |
| 10 | 14.110 | 13534   | 0.33   | 2321   |

|    | RT     | Area  | % Area | Height |
|----|--------|-------|--------|--------|
| 11 | 14.246 | 25763 | 0.62   | 4145   |
| 12 | 14.528 | 6093  | 0.15   | 801    |

*M*  
 24/02/14  
 Analysed By

Fig. 38: HPLC of compound 4i

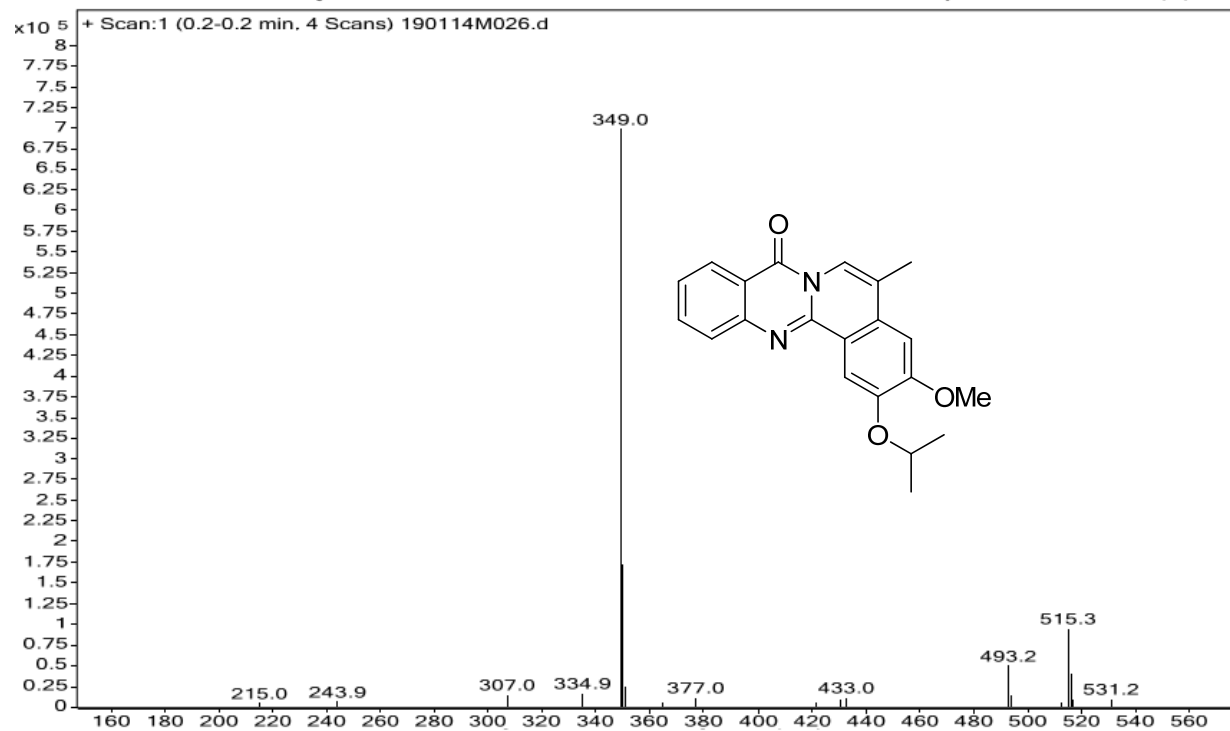

Fig. 39: Mass of compound **4i**

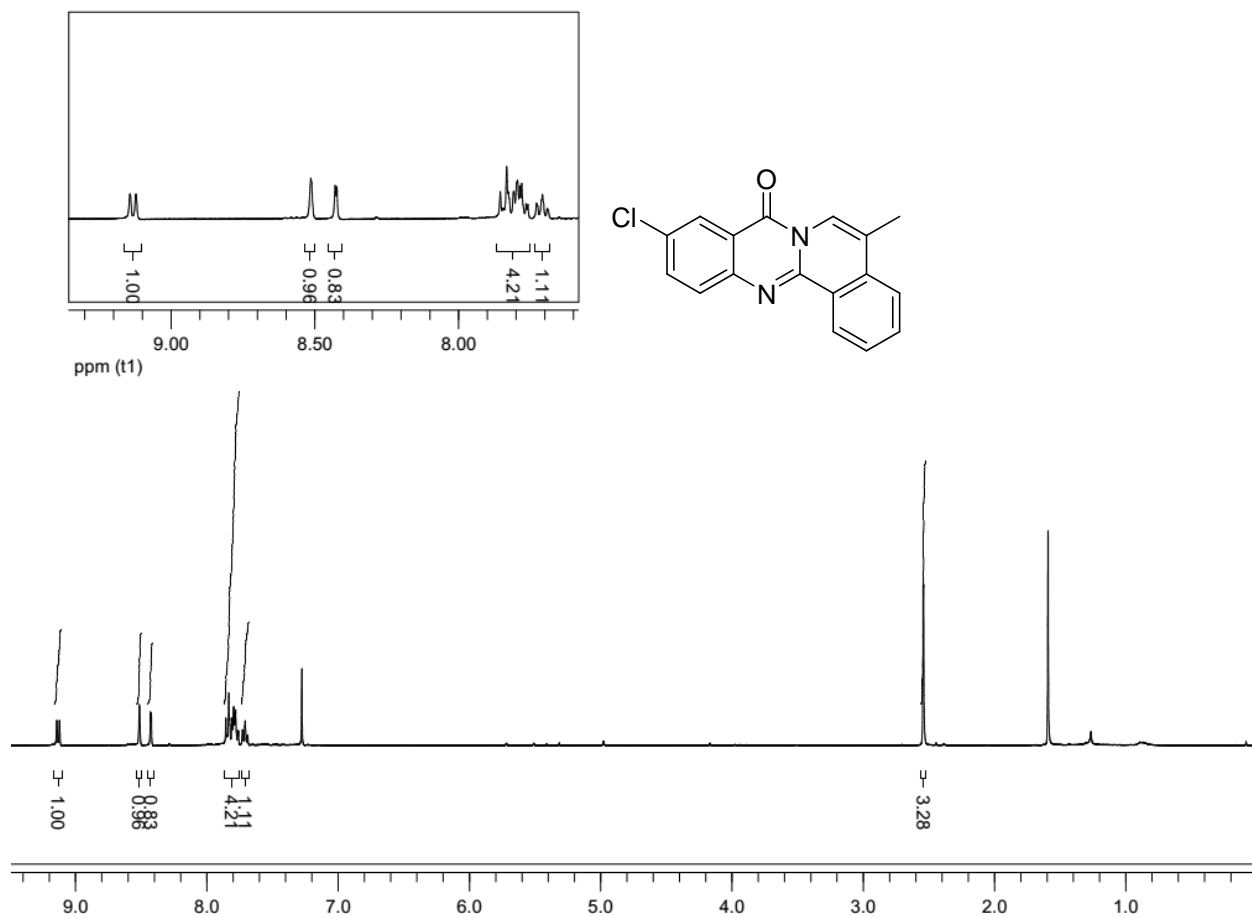

Fig. 40:  $^1\text{H}$  NMR spectra of compound **4j** ( $\text{CDCl}_3$ , 400 MHz)



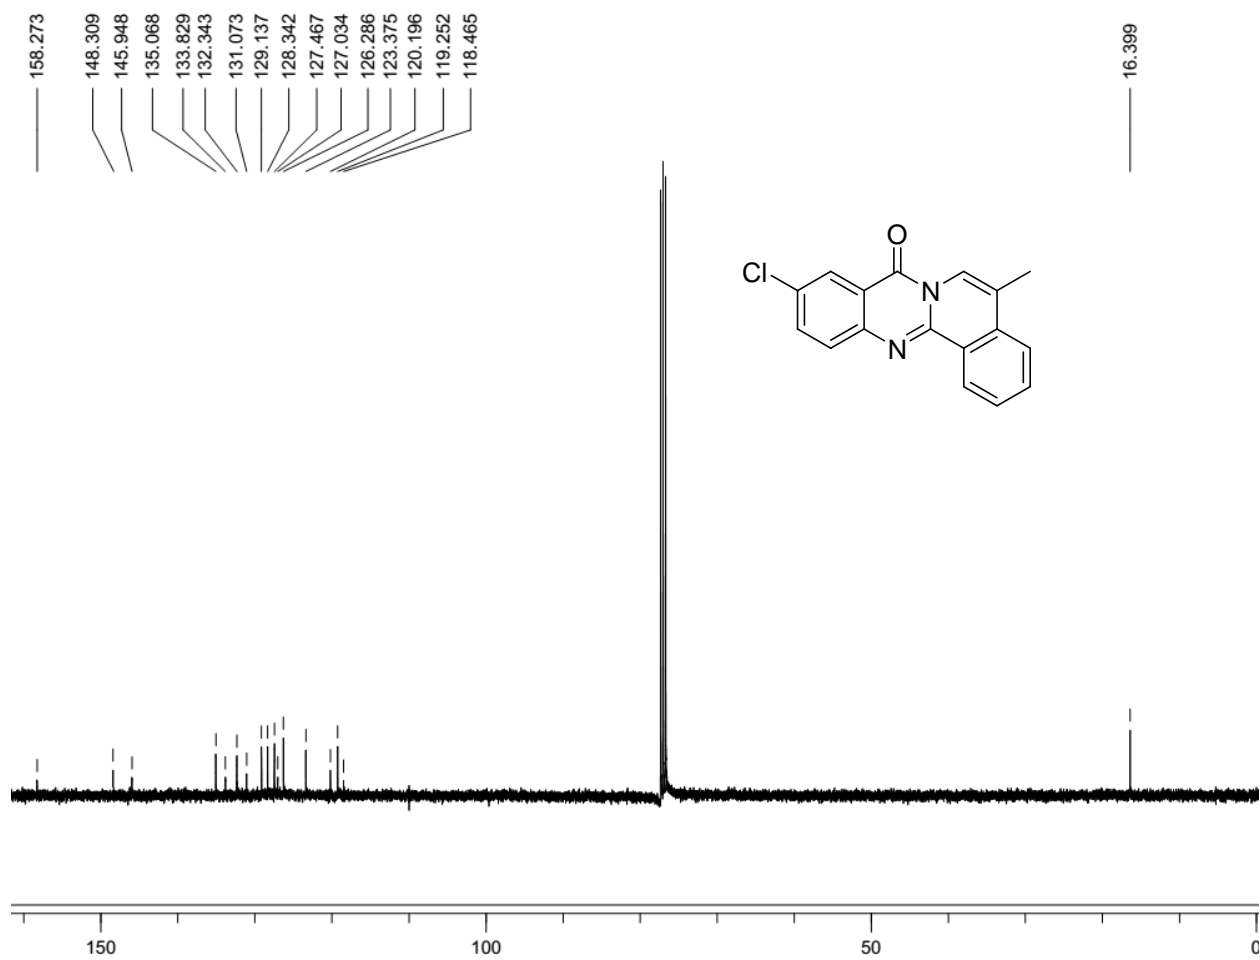

Fig. 41:  $^{13}\text{C}$  NMR spectra of compound **4j** ( $\text{CDCl}_3$ , 100 MHz)

Injection Date : Wed, 19. Mar. 2014  
 Sample Name : ILS/ARJ/5/12  
 Acq Operator : RADHA  
 Acq. Method : D:\CHEM32\_002\1\METHODS\C-18 A20B80.M  
 Analysis Method : D:\CHEM32\_002\1\METHODS\C-18-A70B30G.M  
 Method Info : Column :Symmetry C-18 75\*4.6mm, 3.5µm  
 Mobile phase: A) 0.1% TFA in water,B) ACN (gradient)  
 T/B%:0/20,1/20,4/98,10/98,10.5/20,12/20.  
 FLOW:1.0ml/min Dil: ACN:Water(80:20)

Seq Line : 0  
 Location : Vial 21  
 Inj. No. : 0  
 Inj. Vol. : 0 µl

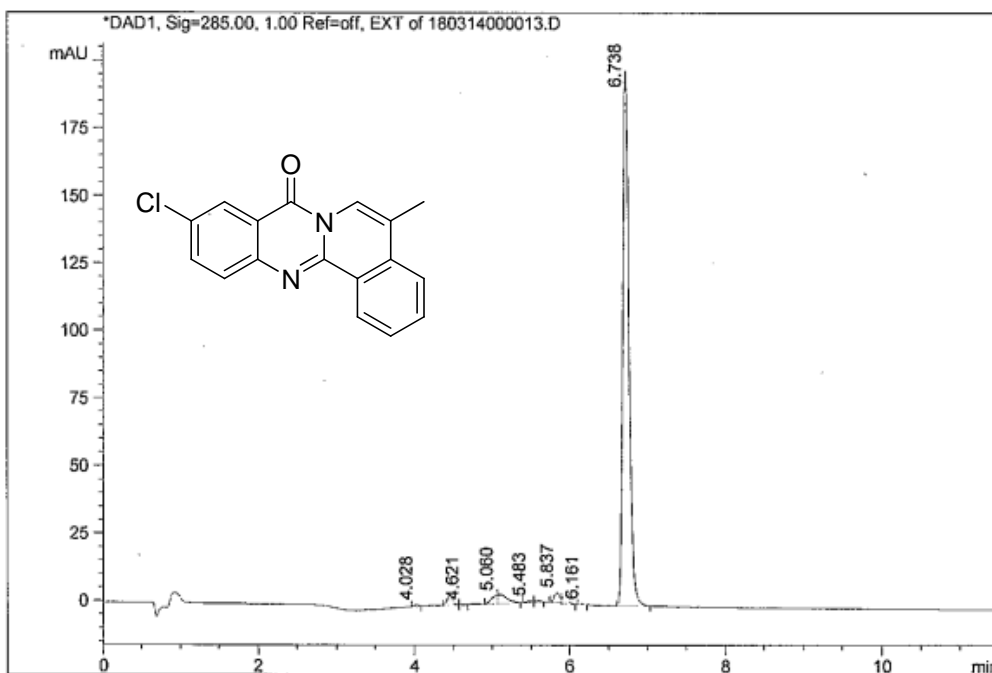

Signal 1: DAD1, Sig=285.00, 1.00 Ref=off, EXT

| Peak # | RT [min] | Area     | Area % |
|--------|----------|----------|--------|
| 1      | 4.028    | 2.023    | 0.166  |
| 2      | 4.451    | 17.173   | 1.408  |
| 3      | 4.621    | 0.928    | 0.076  |
| 4      | 5.060    | 15.705   | 1.288  |
| 5      | 5.109    | 27.077   | 2.220  |
| 6      | 5.483    | 1.724    | 0.141  |
| 7      | 5.590    | 2.553    | 0.209  |
| 8      | 5.837    | 17.519   | 1.436  |
| 9      | 5.947    | 20.322   | 1.666  |
| 10     | 6.161    | 0.857    | 0.070  |
| 11     | 6.738    | 1113.814 | 91.319 |

Fig. 42: HPLC of compound 4j

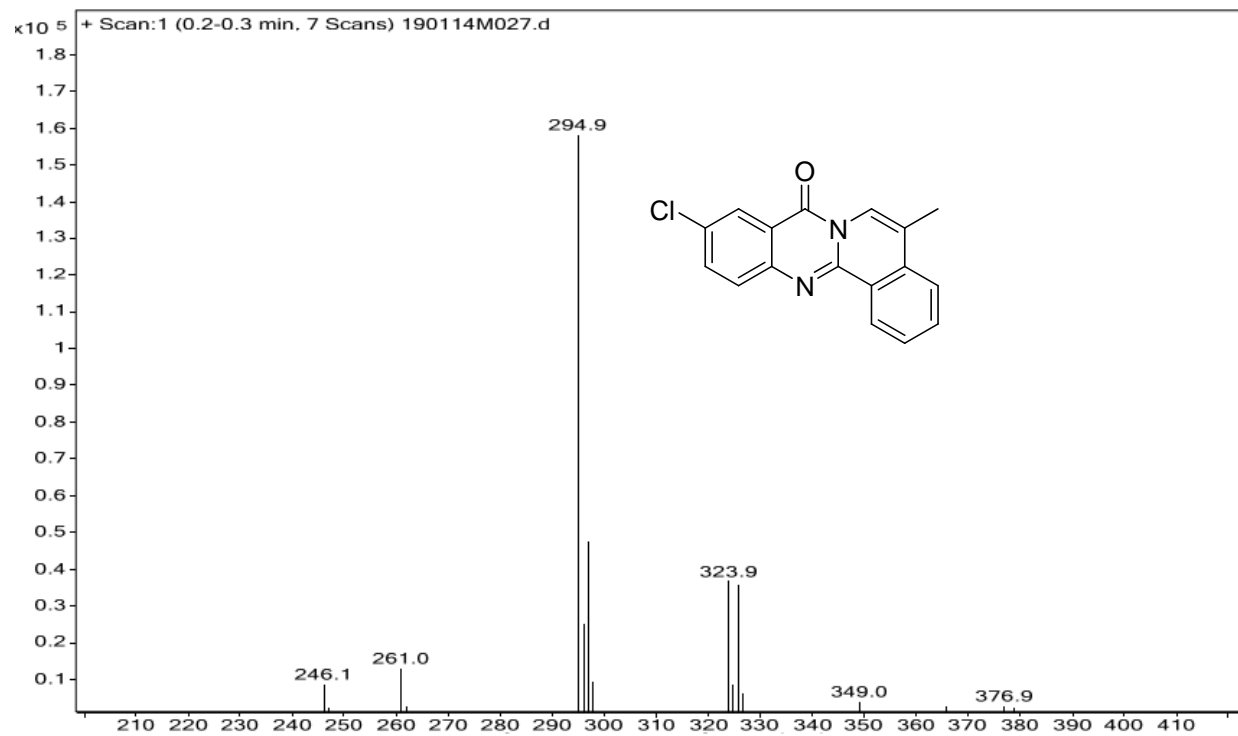

Fig. 43: Mass of compound **4j**

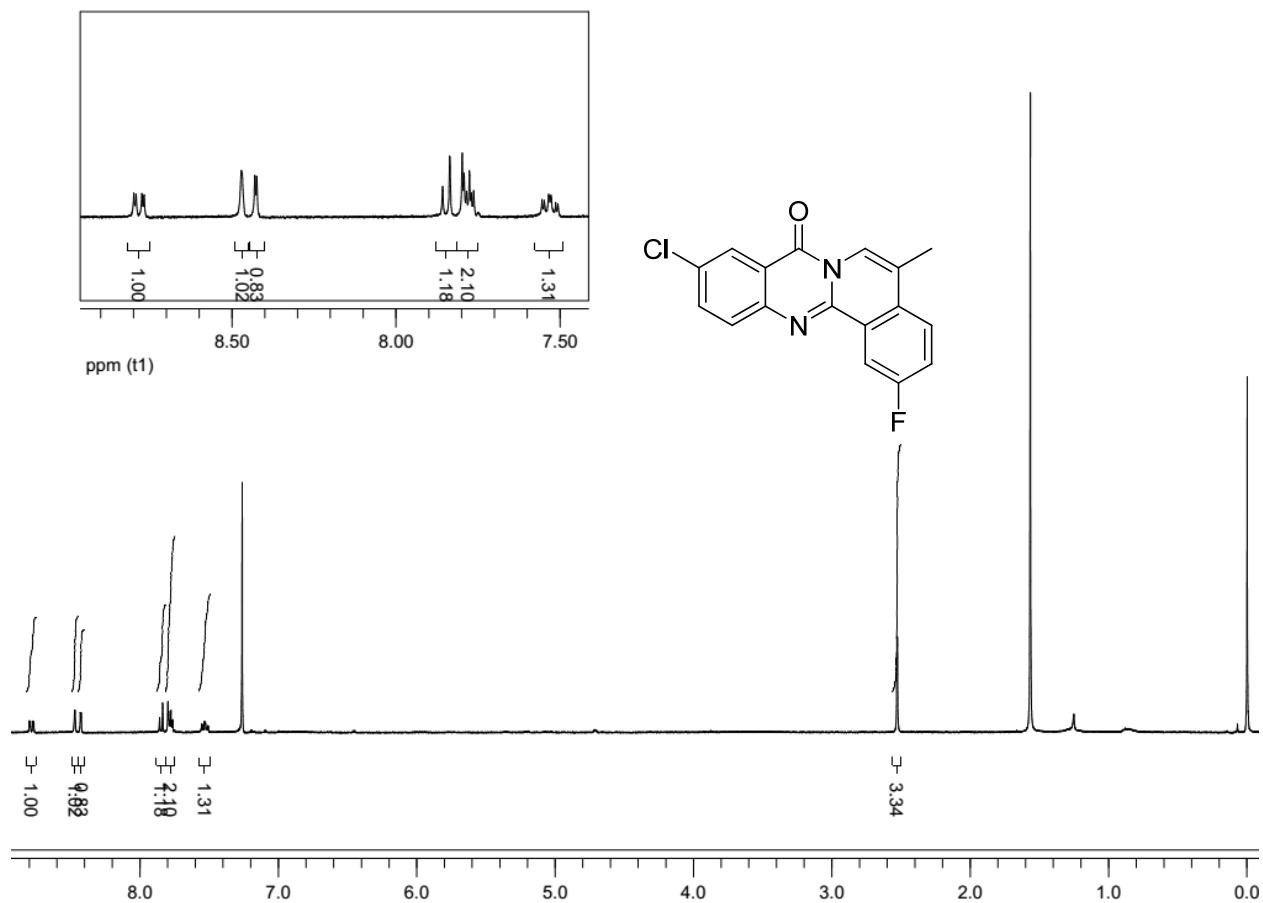

Fig. 44: <sup>1</sup>H NMR spectra of compound **4k** (CDCl<sub>3</sub>, 400 MHz)

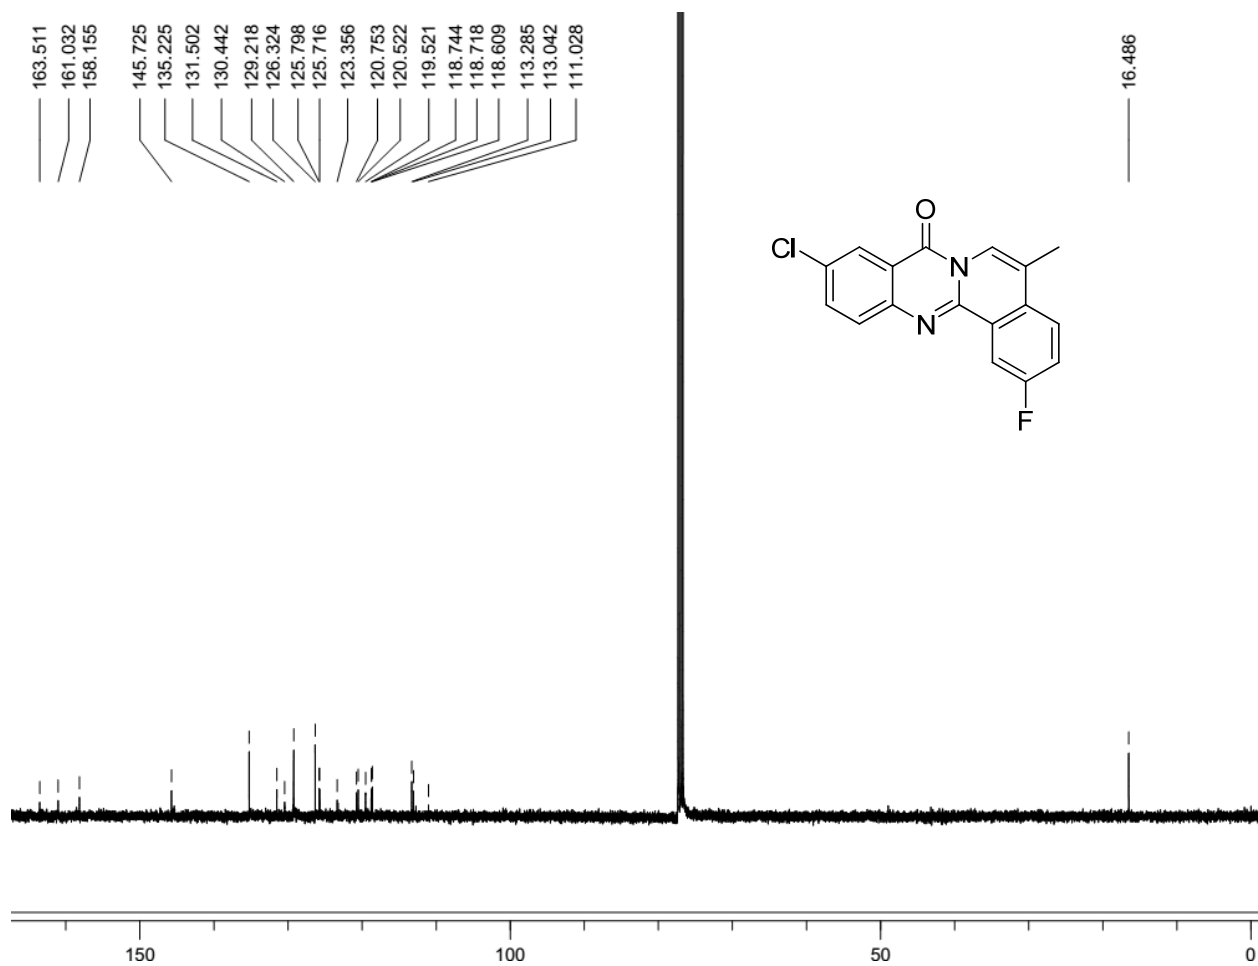

Fig. 45:  $^{13}\text{C}$  NMR spectra of compound **4k** ( $\text{CDCl}_3$ , 100 MHz)

Injection Date : Wed, 19. Mar. 2014                      Location :        Vial 22  
 Sample Name    : ILS/ARJ/5/13                                Inj. No.        :        0  
 Acq Operator   : RADHA                                        Inj. Vol.       :        0 µl  
 Acq. Method    : D:\CHEM32\_002\1\METHODS\C-18 A20B80.M  
 Analysis Method : D:\CHEM32\_002\1\METHODS\C-18-A70B30G.M  
 Method Info    : Column :Symmetry C-18 75\*4.6mm, 3.5µm  
                   : Mobile phase: A) 0.1% TFA in water,B) ACN (gradient)  
                   : T/B%:0/20,1/20,4/98,10/98,10.5/20,12/20.  
                   : FLOW:1.0ml/min Dil: ACN:Water(80:20)

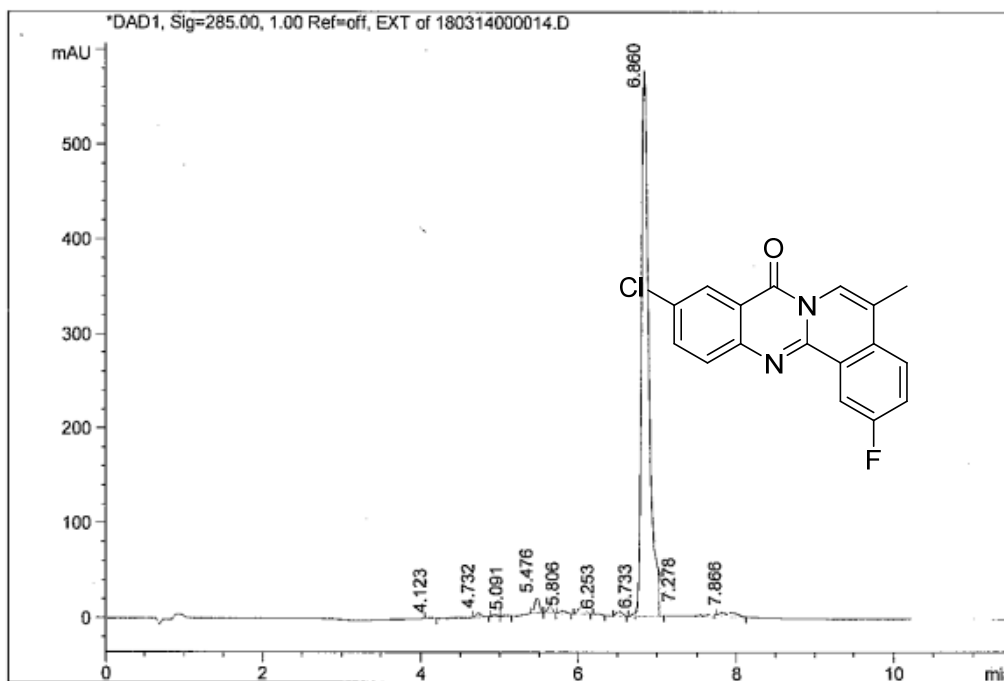

Signal 1: DAD1, Sig=285.00, 1.00 Ref=off, EXT

| Peak # | RT [min] | Area     | Area % |
|--------|----------|----------|--------|
| 1      | 4.123    | 3.570    | 0.075  |
| 2      | 4.732    | 19.446   | 0.406  |
| 3      | 4.932    | 7.481    | 0.156  |
| 4      | 5.091    | 5.208    | 0.109  |
| 5      | 5.476    | 66.204   | 1.383  |
| 6      | 5.643    | 32.734   | 0.684  |
| 7      | 5.806    | 13.061   | 0.273  |
| 8      | 6.041    | 46.150   | 0.964  |
| 9      | 6.253    | 5.979    | 0.125  |
| 10     | 6.524    | 25.533   | 0.533  |
| 11     | 6.733    | 11.030   | 0.230  |
| 12     | 6.860    | 3595.715 | 92.094 |
| 13     | 7.278    | 1.796    | 0.035  |
| 14     | 7.866    | 63.376   | 1.324  |

Fig. 46: HPLC of compound 4k

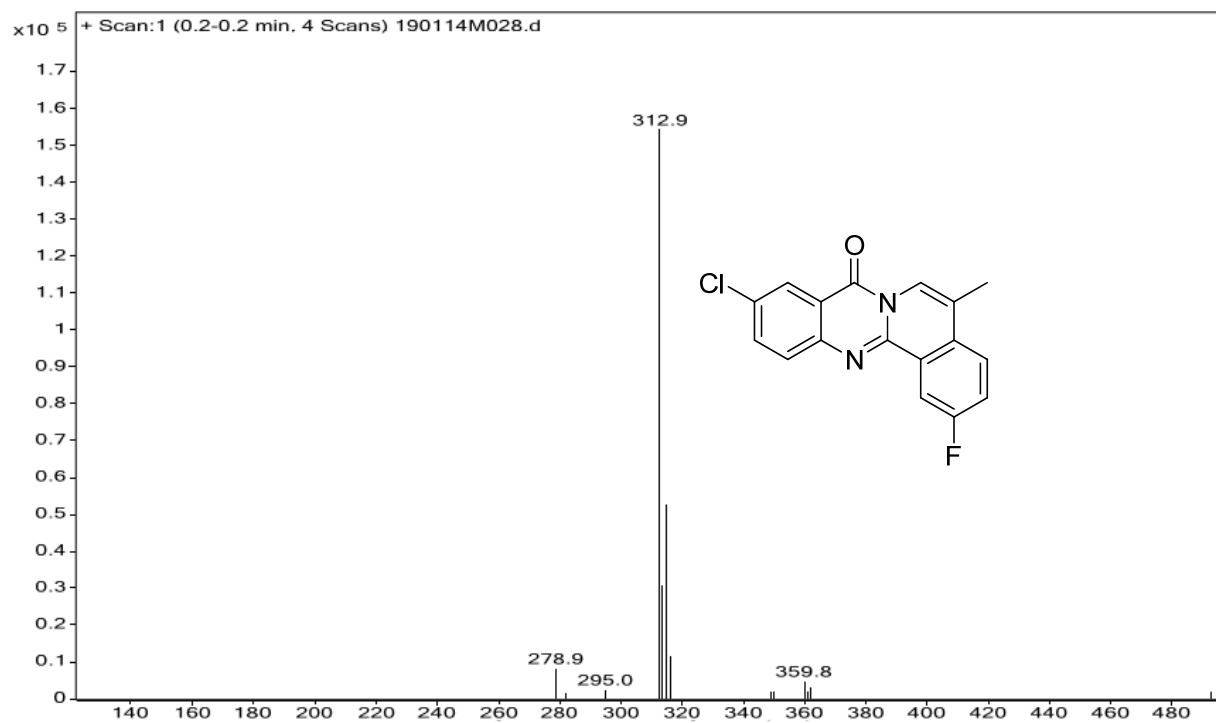

Fig. 47: Mass of compound **4k**

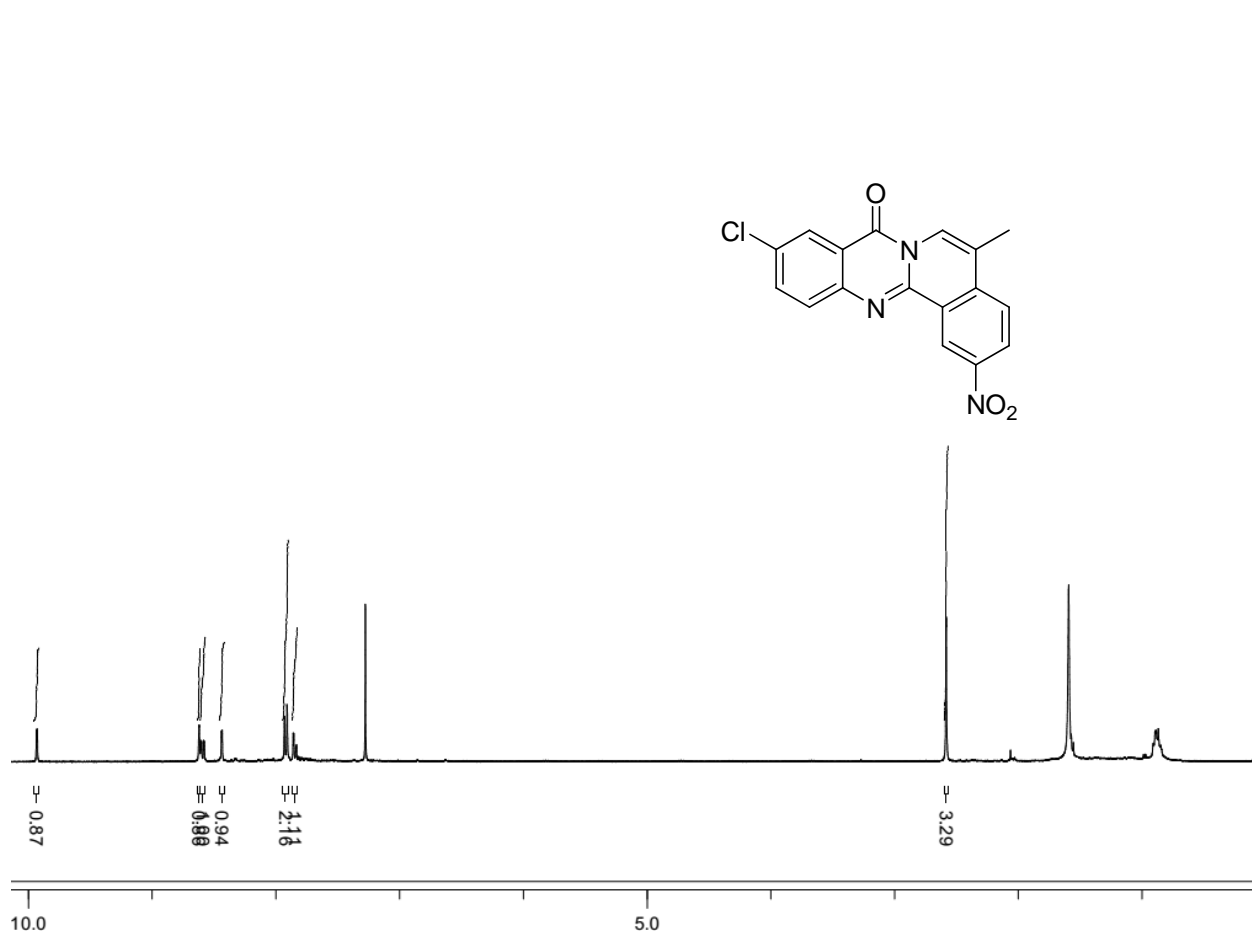

Fig. 48:  $^1\text{H}$  NMR spectra of compound **41** ( $\text{CDCl}_3$ , 400 MHz)



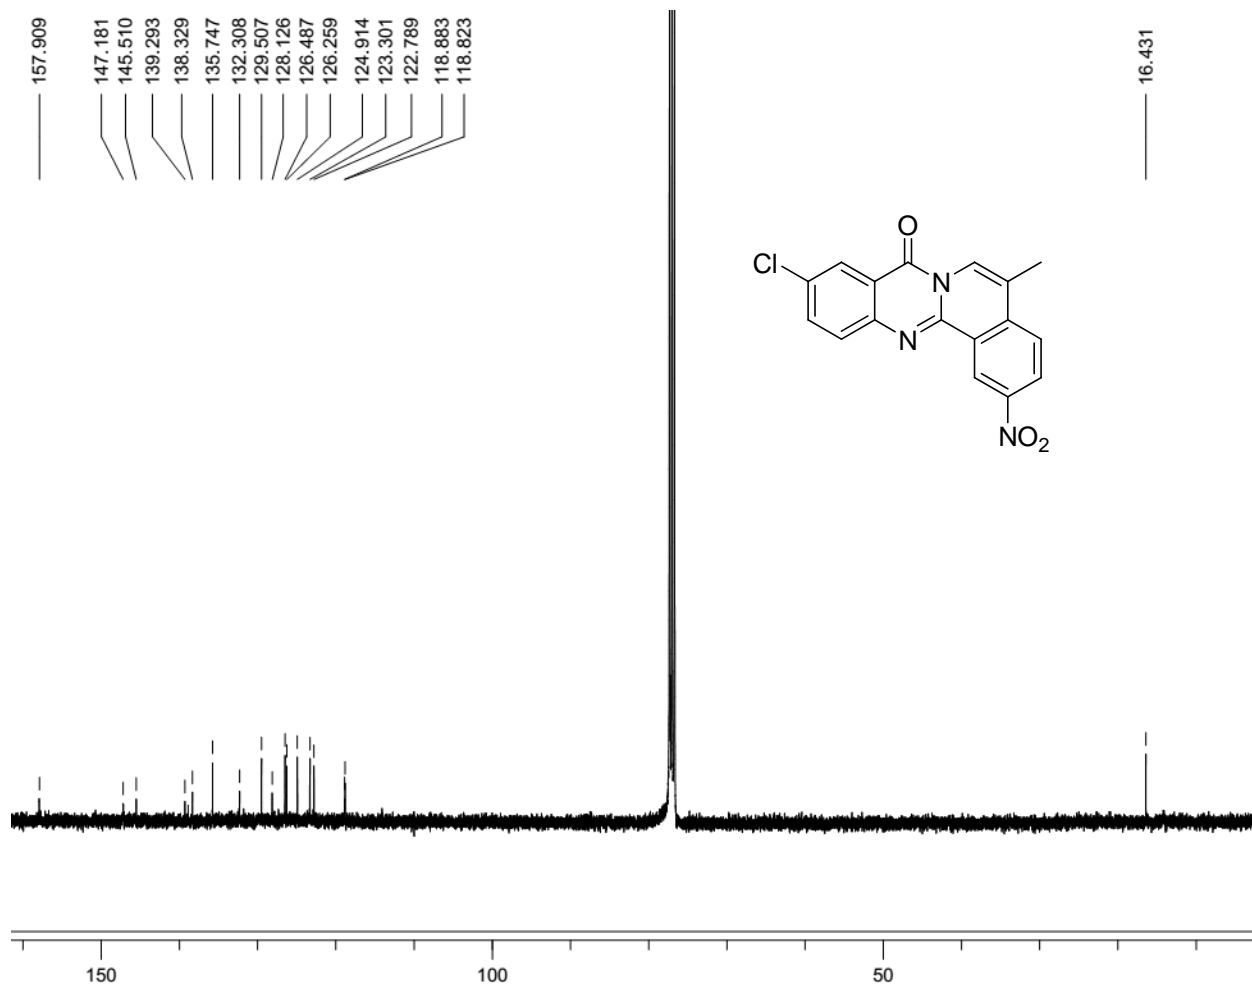

Fig. 49:  $^{13}\text{C}$  NMR spectra of compound **4I** ( $\text{CDCl}_3$ , 100 MHz)

Inj Date : Mon, 14. Apr. 2014 Acq Operator: SHASHIDHAR  
 Sample Name : ILS/ARJ/5/17 Vial 3  
 A.R Number : CM14D008 -> Inj. Vol. : 10µL  
 Acq. Method : D:\CHEM32\_002\1\METHODS\C-18 A80B20.M  
 Analysis Method : D:\CHEM32\_002\1\METHODS\C-18 A80B20.M  
 Method Info : Column : Symmetry C-18 75\*4.6mm3.5µm  
 Mobile phase: A) 0.1% TFA in water , B) ACN  
 T/B% : 0/20,1/20,4/98,10/98,10.5/20,12/20.  
 Flow: 1.0 ml/min Diluent: ACN:Water(80:20)

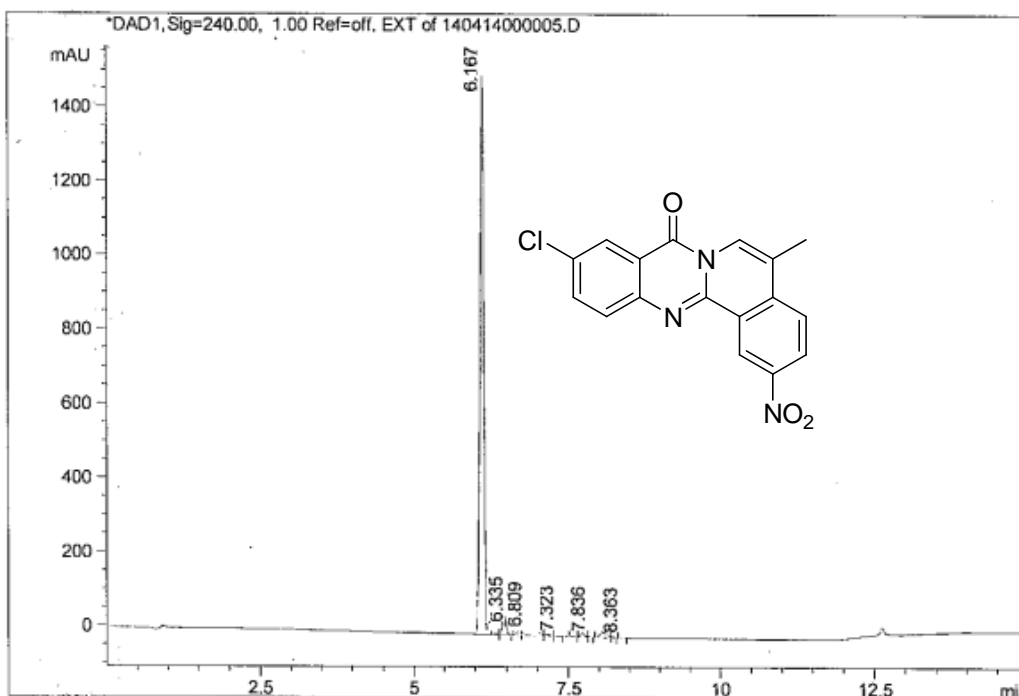

Signal 1: DAD1, Sig=240.00, 1.00 Ref=off, EXT

| Peak # | RT [min] | Area     | Area % |
|--------|----------|----------|--------|
| 1      | 6.167    | 6501.815 | 92.296 |
| 2      | 6.335    | 9.078    | 0.128  |
| 3      | 6.464    | 193.773  | 2.727  |
| 4      | 6.684    | 29.836   | 0.420  |
| 5      | 6.809    | 178.952  | 2.518  |
| 6      | 7.164    | 17.489   | 0.246  |
| 7      | 7.323    | 6.065    | 0.085  |
| 8      | 7.579    | 7.627    | 0.107  |
| 9      | 7.730    | 40.471   | 0.570  |
| 10     | 7.836    | 2.209    | 0.031  |
| 11     | 8.052    | 66.167   | 0.931  |

Fig. 50: HPLC of compound 41



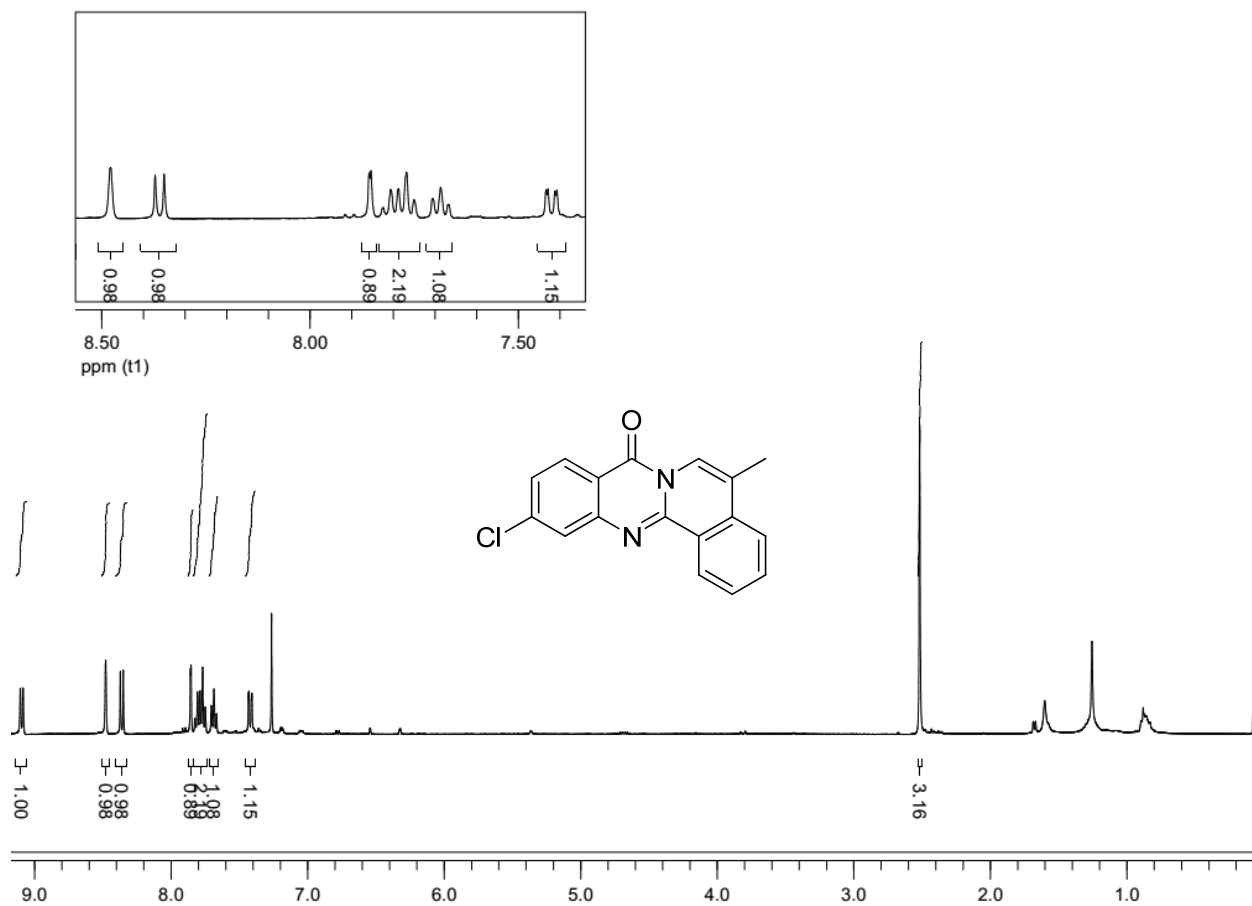

Fig. 52:  $^1\text{H}$  NMR spectra of compound **4m** ( $\text{CDCl}_3$ , 400 MHz)

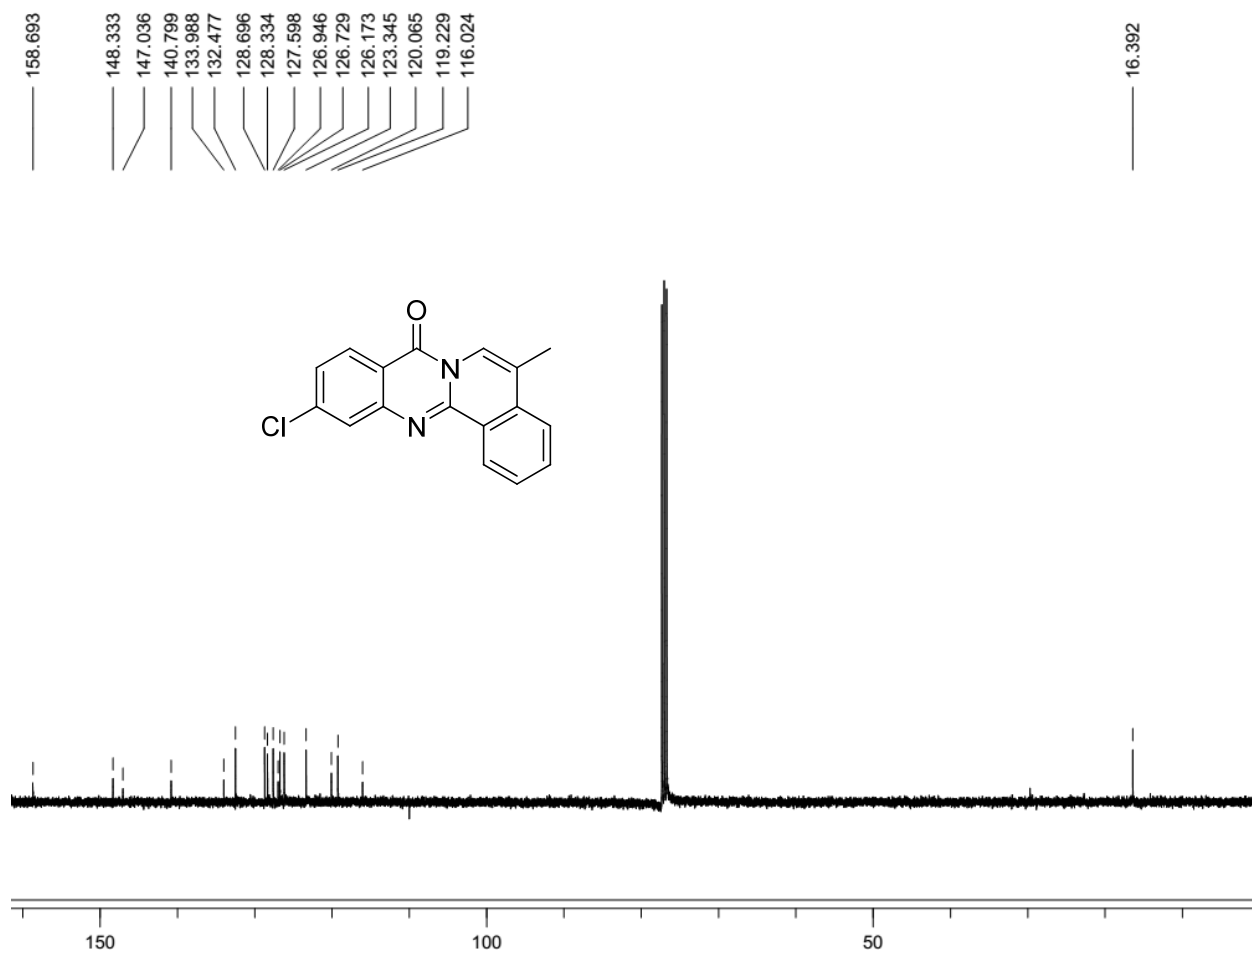

Fig. 53:  $^{13}\text{C}$  NMR spectra of compound **4m** ( $\text{CDCl}_3$ , 100 MHz)

## SAMPLE INFORMATION

|                                           |                                                    |
|-------------------------------------------|----------------------------------------------------|
| Sample Name: ILS/AR/J/5/4                 | Sample Set Name: 210214_1                          |
| Sample Type: Unknown                      | Acq. Method Set: CFZ                               |
| Vial: 29                                  | Processing Method: CFZ_PRO                         |
| Injection #: 1                            | Channel Name: PDA Max Plot 190.0 - 800.0 @2        |
| Injection Volume: 5.00 ul                 | Proc. Chnl. Descr.: PDA MaxPlot (190.0 nm to 800.0 |
| Run Time: 30.0 Minutes                    |                                                    |
| Date Acquired: 2/21/2014 8:34:40 PM IST   |                                                    |
| Date Processed: 2/24/2014 11:42:25 AM IST |                                                    |

Column: X TERRA RP-18 250\*4.6mm 5µm  
 Mobile phase: A) 0.1% TFA in water B) ACN  
 T/%B: 0/20, 3/20, 12/95, 23/95, 25/20, 30/20  
 Flow: 1.0 ml/min, Diluent: ACN: WATER (80:20)

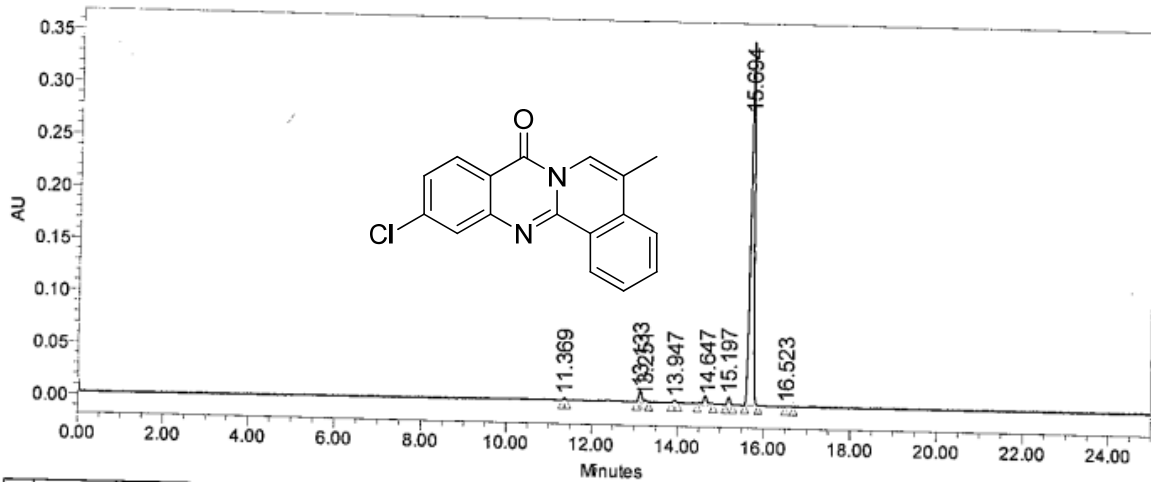

|   | RT     | Area    | % Area | Height |
|---|--------|---------|--------|--------|
| 1 | 11.369 | 6594    | 0.26   | 2043   |
| 2 | 13.133 | 48203   | 1.88   | 10278  |
| 3 | 13.251 | 7473    | 0.29   | 1724   |
| 4 | 13.947 | 8836    | 0.35   | 2135   |
| 5 | 14.647 | 31224   | 1.14   | 7243   |
| 6 | 15.197 | 31644   | 1.24   | 7308   |
| 7 | 15.694 | 2434497 | 95.64  | 347062 |
| 8 | 16.523 | 5198    | 0.20   | 710    |

*M. 2014-2-14*  
Analysed By

Fig. 54: HPLC of compound **4m**

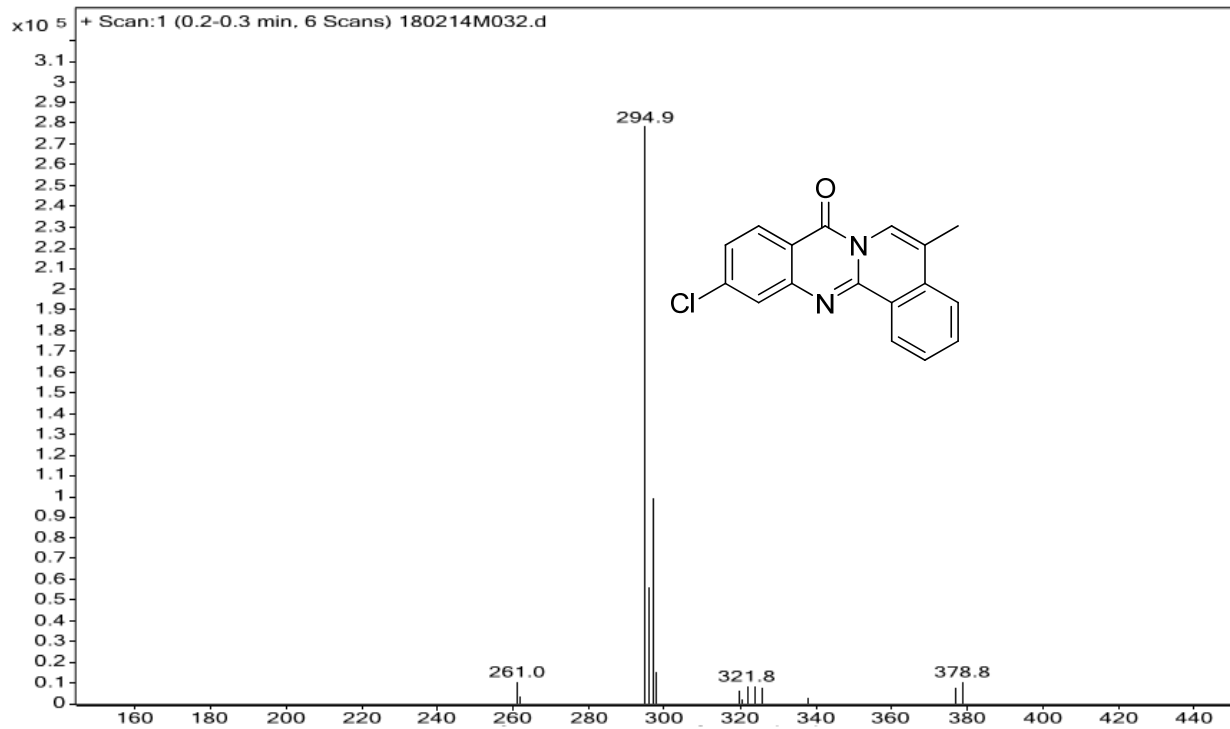

Fig. 55: Mass of compound **4m**

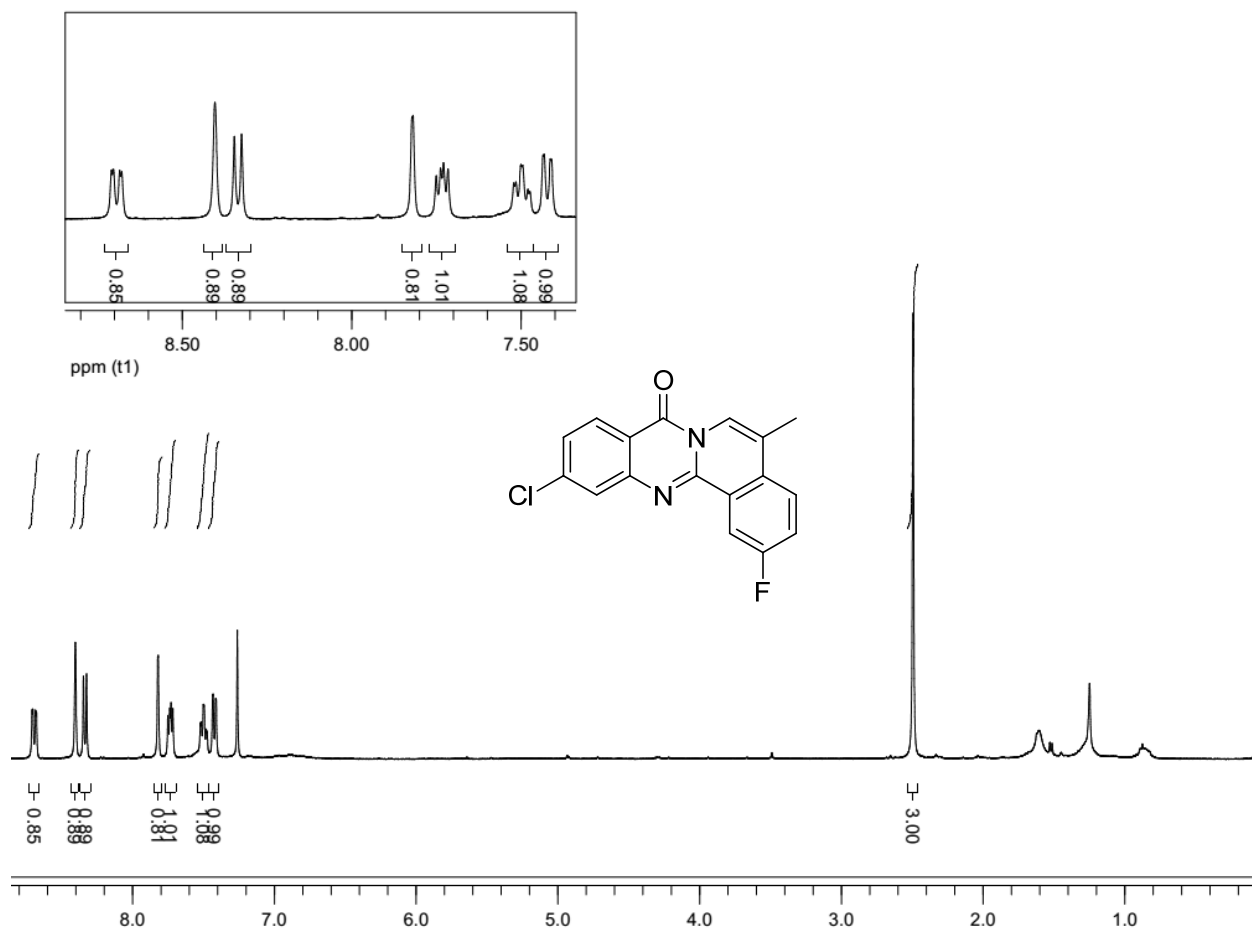

Fig. 56:  $^1\text{H}$  NMR spectra of compound **4n** ( $\text{CDCl}_3$ , 400 MHz)



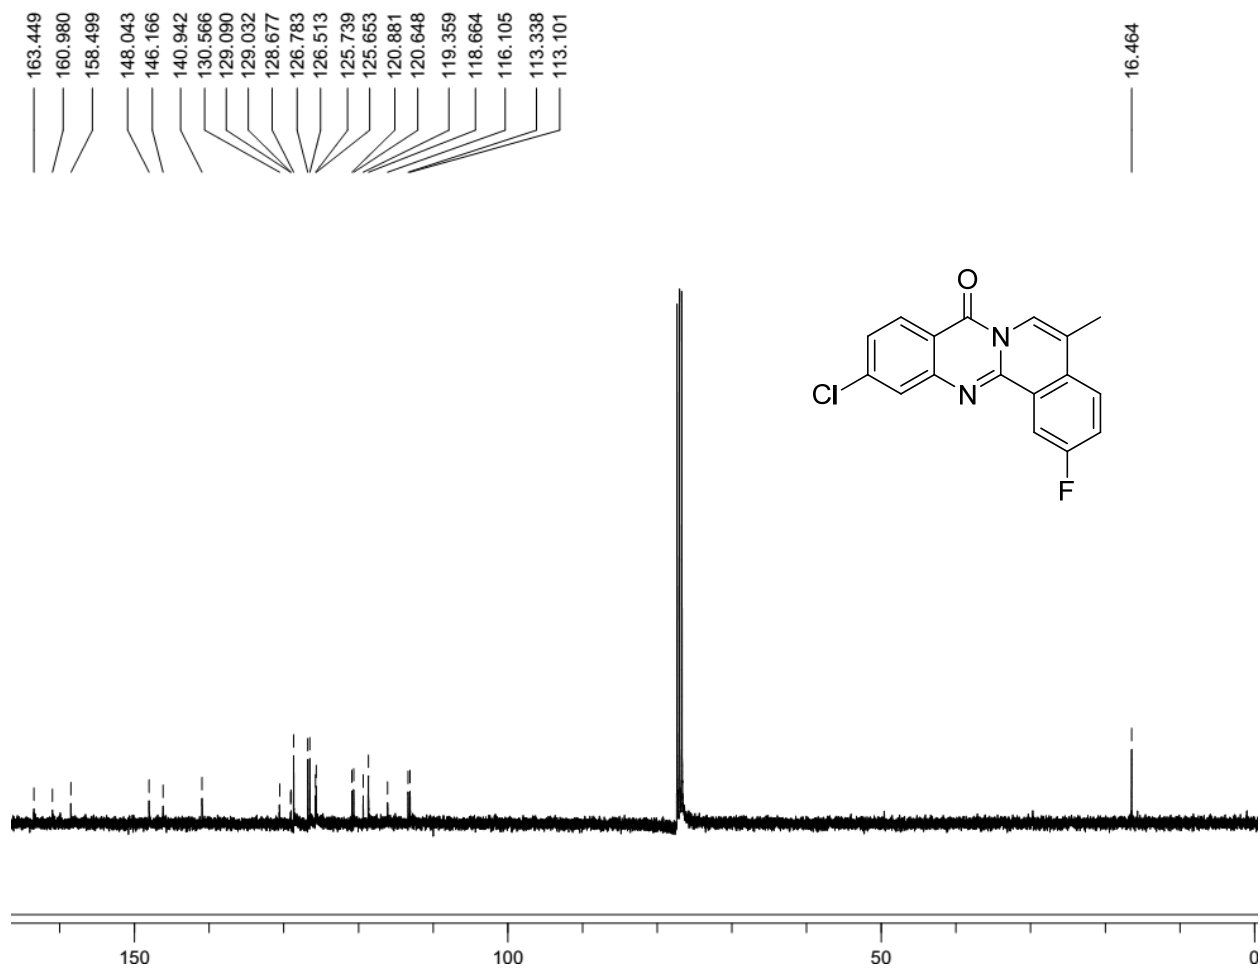

Fig. 57:  $^{13}\text{C}$  NMR spectra of compound **4n** ( $\text{CDCl}_3$ , 100 MHz)

|                   |                           |                     |              |
|-------------------|---------------------------|---------------------|--------------|
| Sample Name:      | ILS/ARJ/5/5               | Sample Set Name:    | 210214_1     |
| Sample Type:      | Unknown                   | Acq. Method Set:    | CFZ          |
| Vial:             | 30                        | Processing Method:  | CFZ_PRO      |
| Injection #:      | 1                         | Channel Name:       | 285.0nm      |
| Injection Volume: | 5.00 ul                   | Proc. Chnl. Descr.: | PDA 285.0 nm |
| Run Time:         | 30.0 Minutes              |                     |              |
| Date Acquired:    | 2/21/2014 9:10:24 PM IST  |                     |              |
| Date Processed:   | 2/24/2014 11:43:53 AM IST |                     |              |

Column: X TERRA RP-18 250\*4.6mm 5µm  
 Mobile phase: A) 0.1% TFA in water B) ACN  
 T7%B: 0/20, 3/20, 12/95, 23/95, 25/20, 30/20  
 Flow: 1.0 ml /min, Diluent: ACN: WATER (80:20)

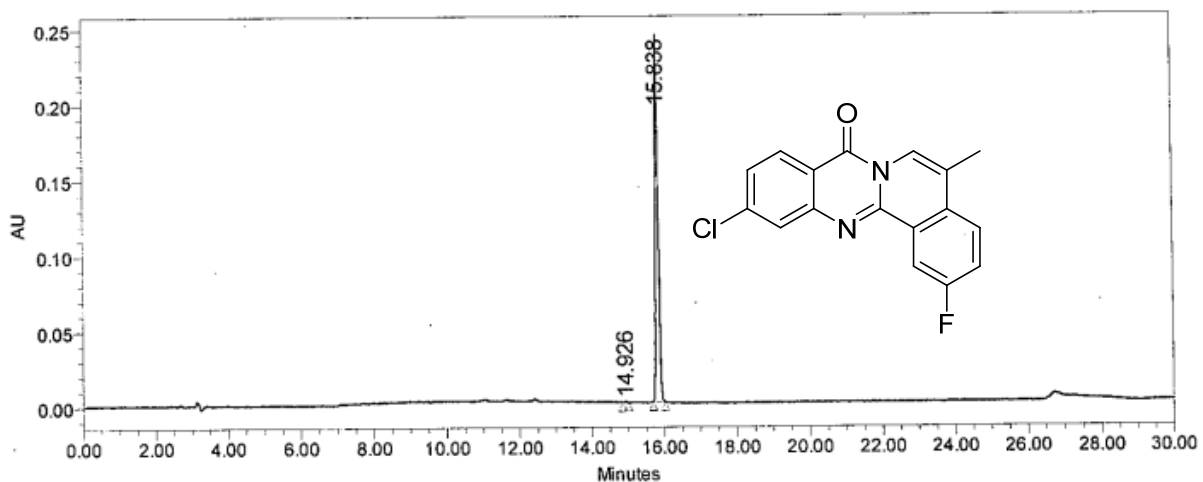

|   | RT     | Area    | % Area | Height |
|---|--------|---------|--------|--------|
| 1 | 14.926 | 5800    | 0.42   | 1166   |
| 2 | 15.838 | 1371486 | 99.58  | 243204 |

Analysed By *M. J. Foster*

Fig. 58: HPLC of compound 4n

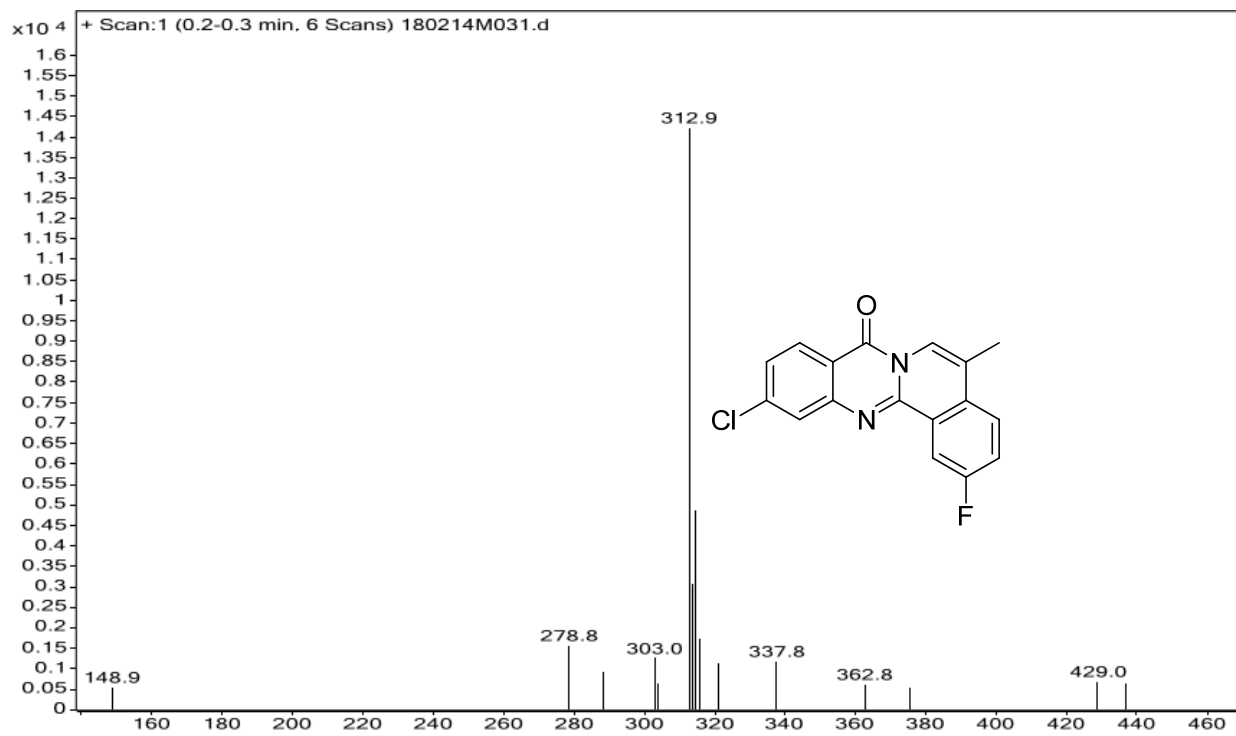

Fig. 59: Mass of compound **4n**

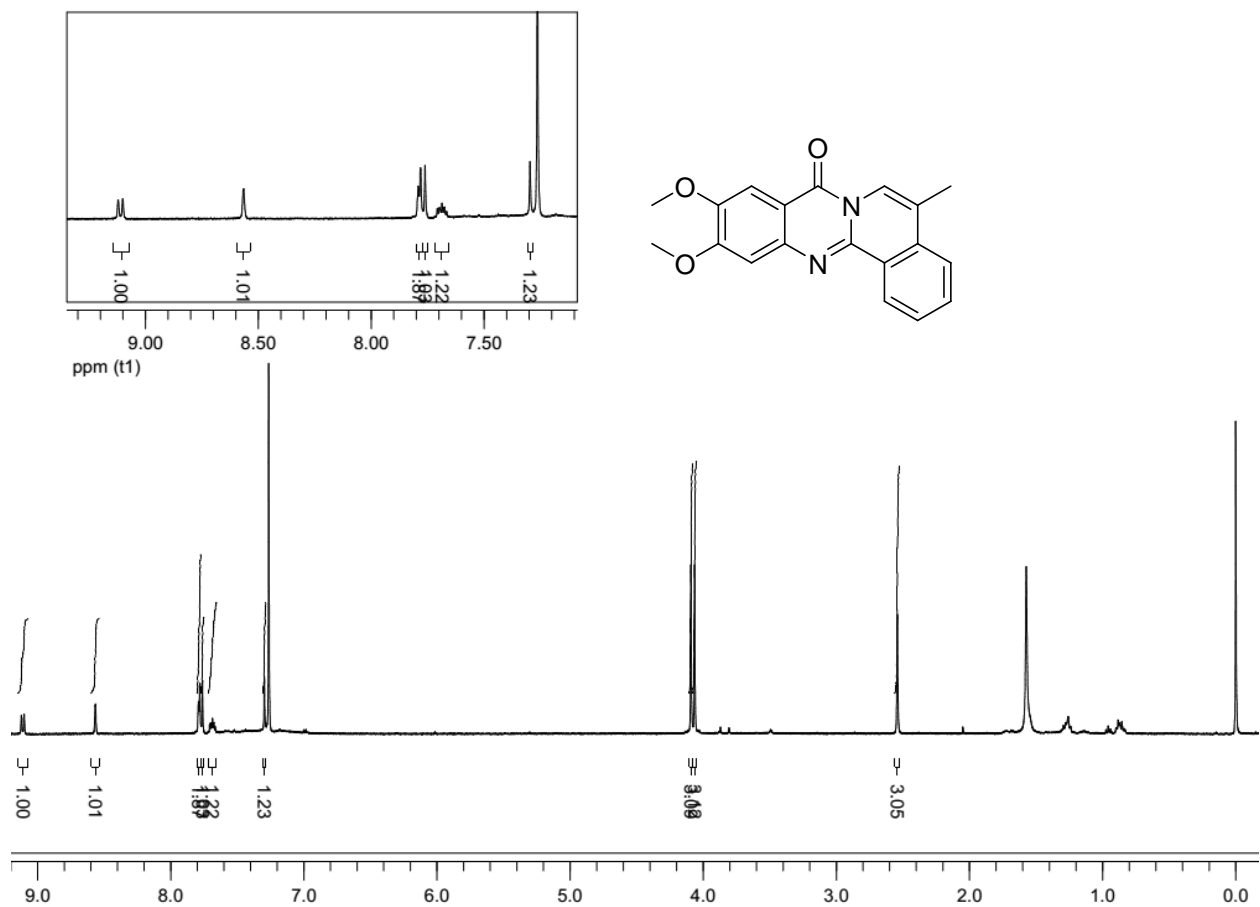

Fig. 60:  $^1\text{H}$  NMR spectra of compound **4o** ( $\text{CDCl}_3$ , 400 MHz)

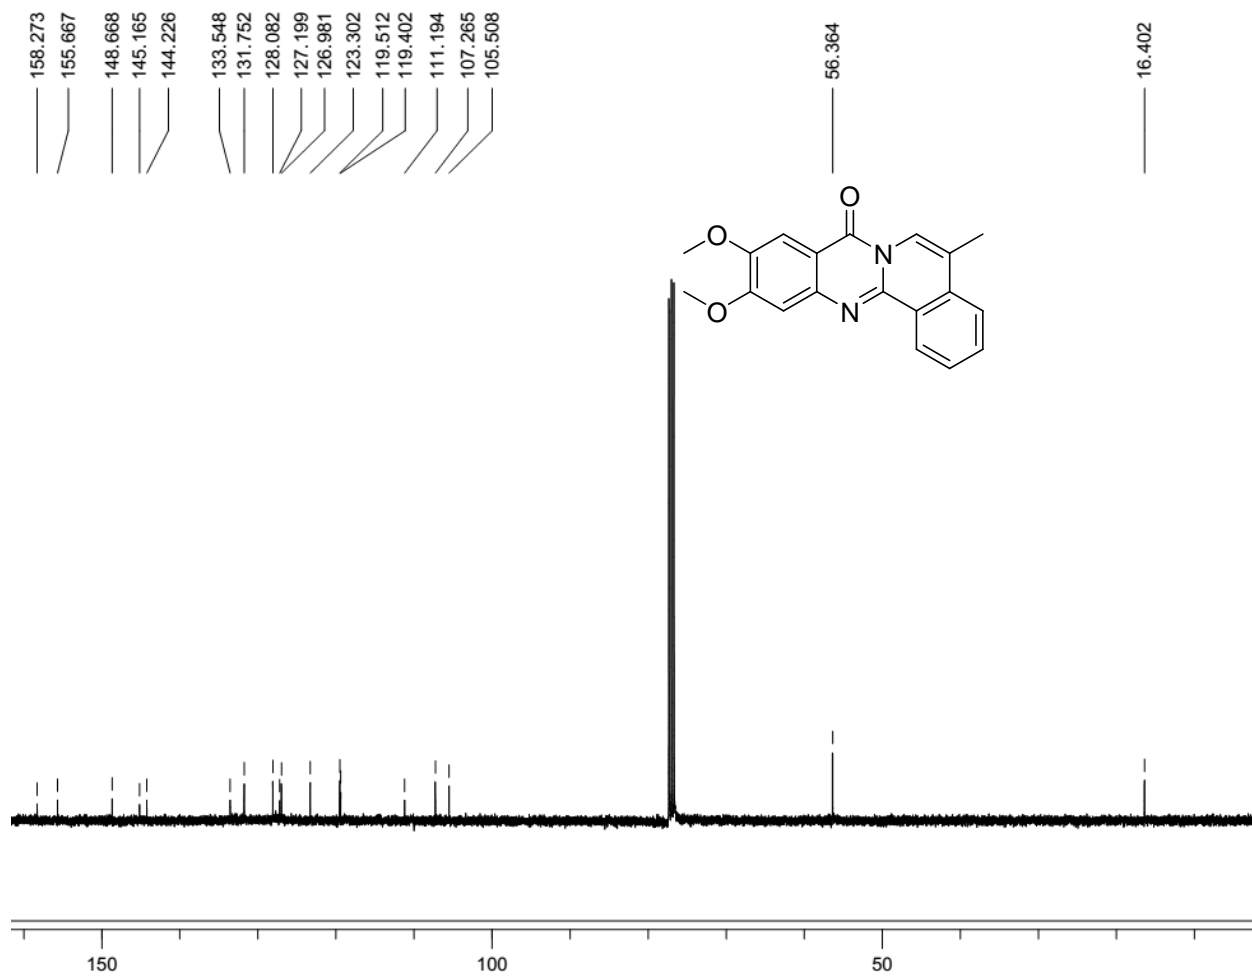

Fig. 61:  $^{13}\text{C}$  NMR spectra of compound **4o** ( $\text{CDCl}_3$ , 100 MHz)

SAMPLE INFORMATION

|                   |                           |                     |              |
|-------------------|---------------------------|---------------------|--------------|
| Sample Name:      | ILS/ARJ/5/6               | Sample Set Name:    | 210214_1     |
| Sample Type:      | Unknown                   | Acq. Method Set:    | CFZ          |
| Vial:             | 31                        | Processing Method:  | CFZ_PRO      |
| Injection #:      | 1                         | Channel Name:       | 285.0nm      |
| Injection Volume: | 5.00 ul                   | Proc. Chnl. Descr.: | PDA 285.0 nm |
| Run Time:         | 30.0 Minutes              |                     |              |
| Date Acquired:    | 2/21/2014 9:46:05 PM IST  |                     |              |
| Date Processed:   | 2/24/2014 11:45:55 AM IST |                     |              |

Column: X TERRA RP-18 250\*4.6mm 5µm  
 Mobile phase: A) 0.1% TFA in water B) ACN  
 T/%B: 0/20, 3/20, 12/95, 23/95, 25/20, 30/20  
 Flow: 1.0 ml/min, Diluent: ACN: WATER (80:20)

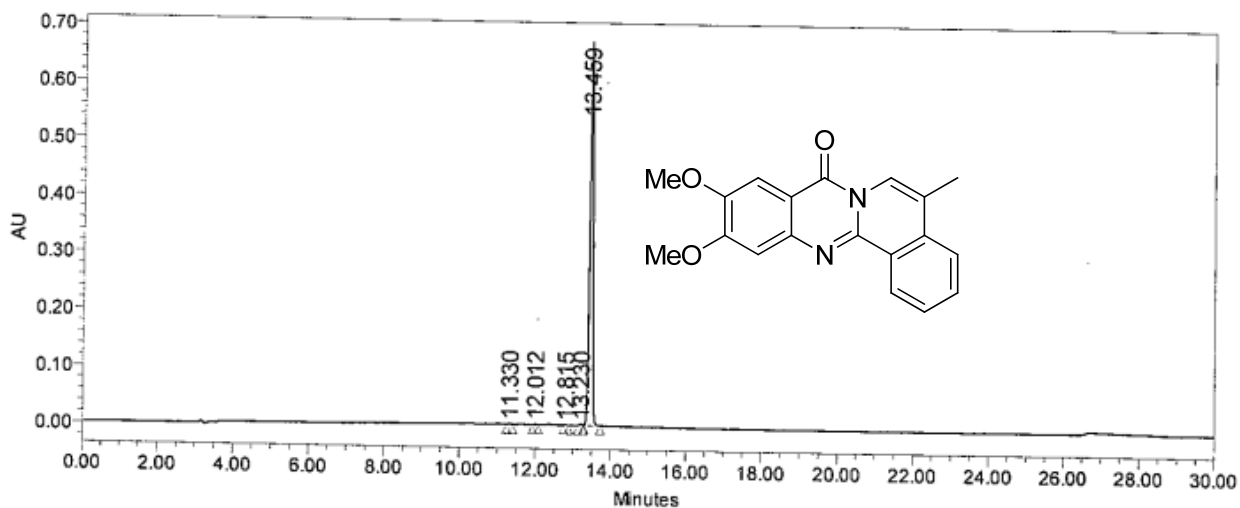

|   | RT     | Area    | % Area | Height |
|---|--------|---------|--------|--------|
| 1 | 11.330 | 9221    | 0.23   | 1936   |
| 2 | 12.012 | 8144    | 0.21   | 1652   |
| 3 | 12.815 | 5267    | 0.13   | 1257   |
| 4 | 13.230 | 12278   | 0.31   | 2533   |
| 5 | 13.459 | 3903991 | 99.11  | 670715 |

Analysed By: *[Signature]*  
 28/02/14

Fig. 62: HPLC of compound 4o

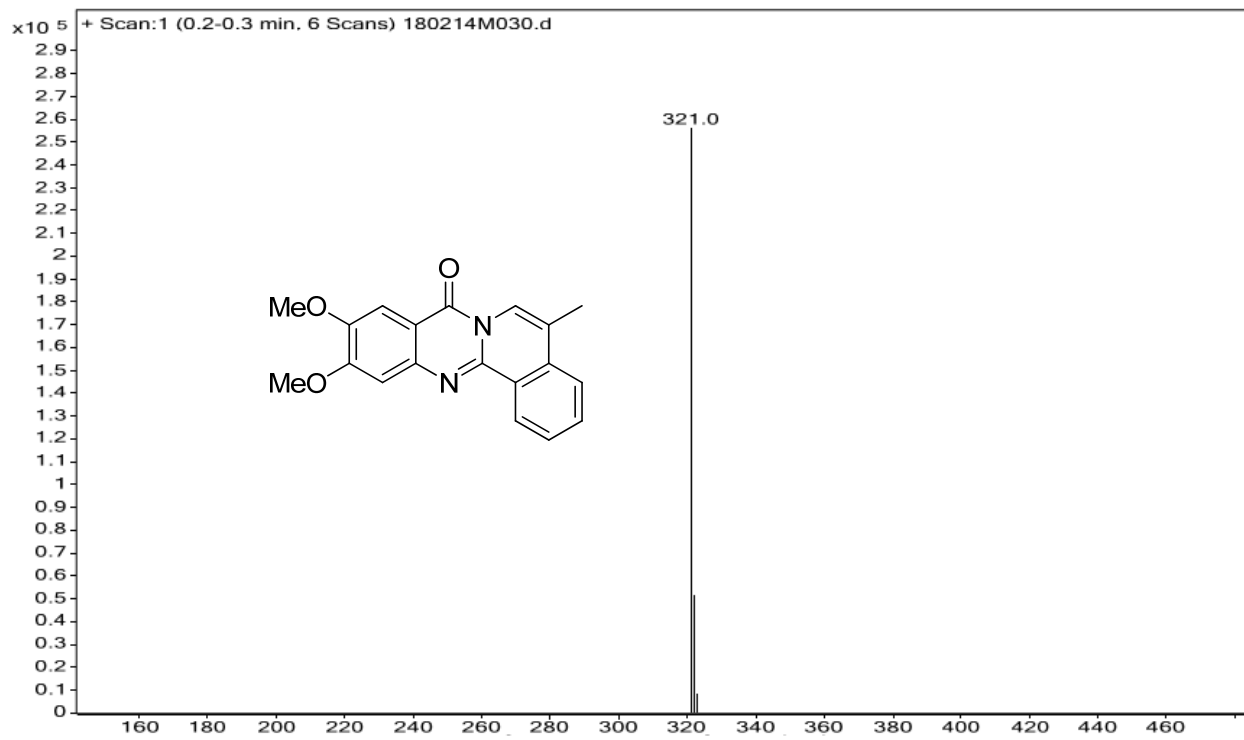

Fig. 63: Mass of compound **4o**

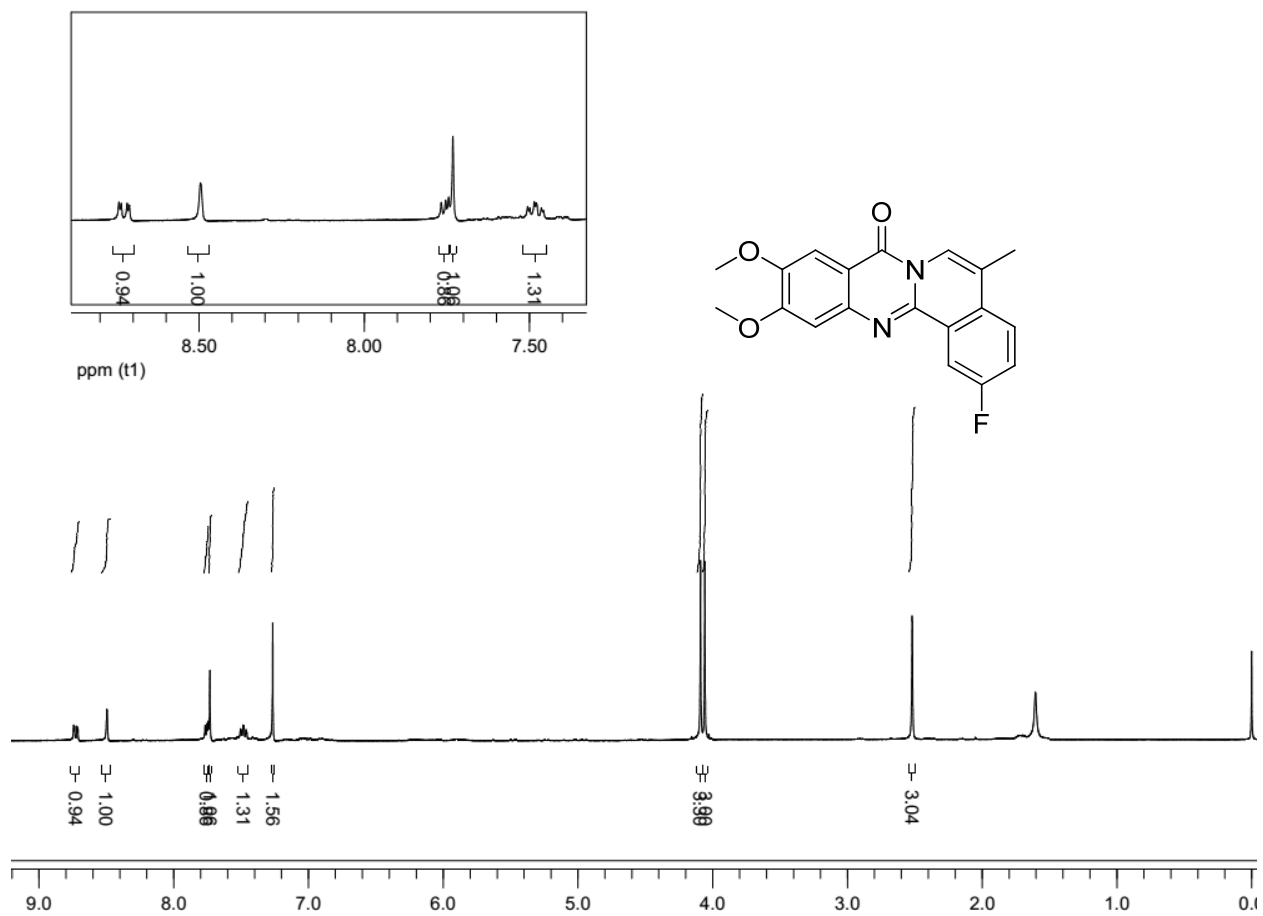

Fig. 64:  $^1\text{H}$  NMR spectra of compound **4p** ( $\text{CDCl}_3$ , 400 MHz)



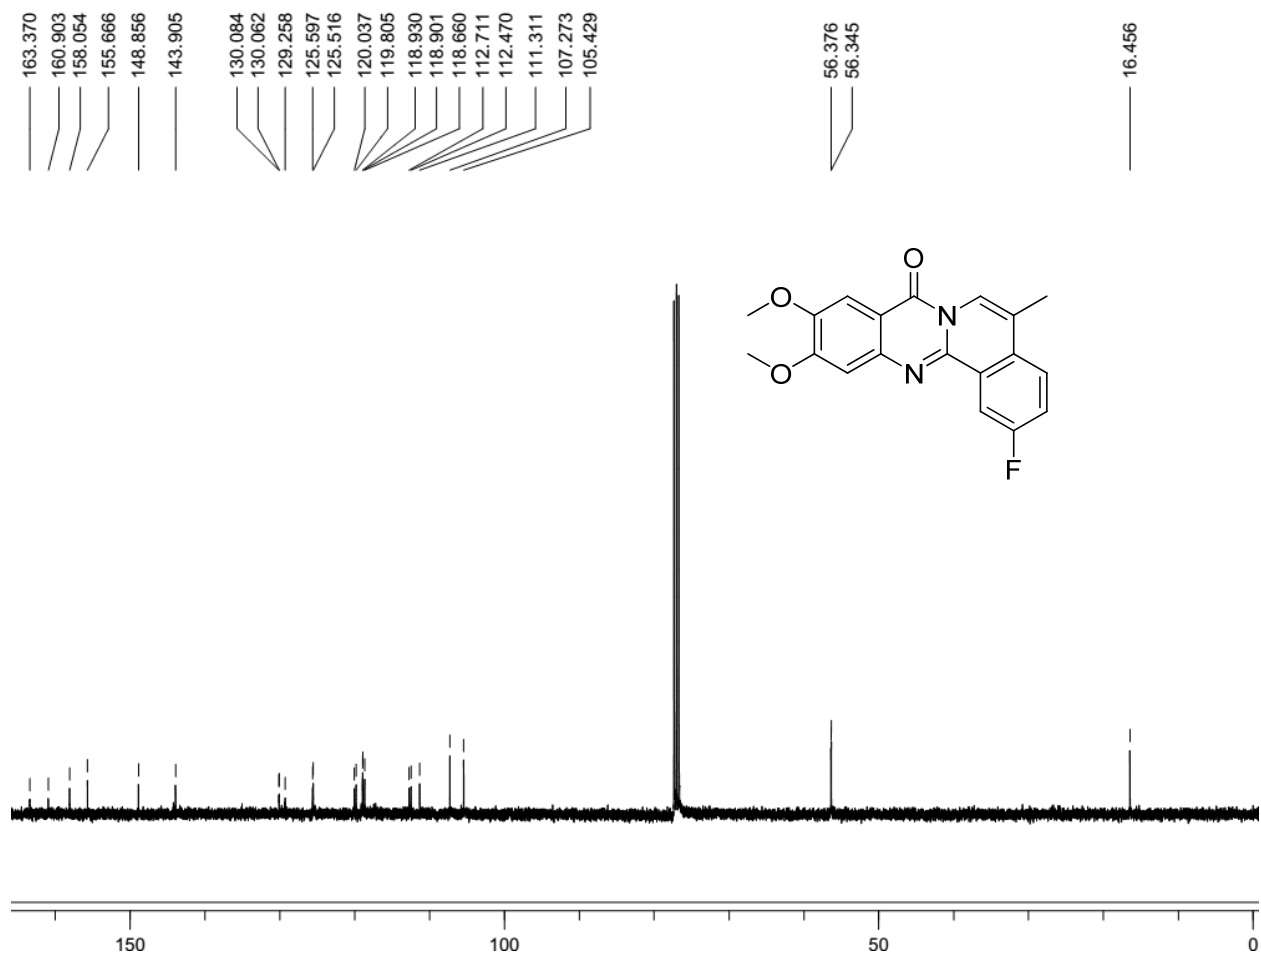

Fig. 65:  $^{13}\text{C}$  NMR spectra of compound **4p** ( $\text{CDCl}_3$ , 100 MHz)

### SAMPLE INFORMATION

|                                           |                                  |
|-------------------------------------------|----------------------------------|
| Sample Name: ILS/ARJ/5/8                  | Sample Set Name: 210214_1        |
| Sample Type: Unknown                      | Acq. Method Set: CFZ             |
| Vial: 33                                  | Processing Method: CFZ_PRO       |
| Injection #: 1                            | Channel Name: 280.0nm            |
| Injection Volume: 5.00 ul                 | Proc. Chnl. Descr.: PDA 280.0 nm |
| Run Time: 30.0 Minutes                    |                                  |
| Date Acquired: 2/21/2014 10:57:31 PM IST  |                                  |
| Date Processed: 2/24/2014 11:49:42 AM IST |                                  |

Column: X TERRA RP-18 250\*4.6mm 5µm  
 Mobile phase: A) 0.1% TFA in water B) ACN  
 T/%B: 0/20, 3/20, 12/95, 23/95, 25/20, 30/20  
 Flow: 1.0 ml/min, Diluent: ACN: WATER (80:20)

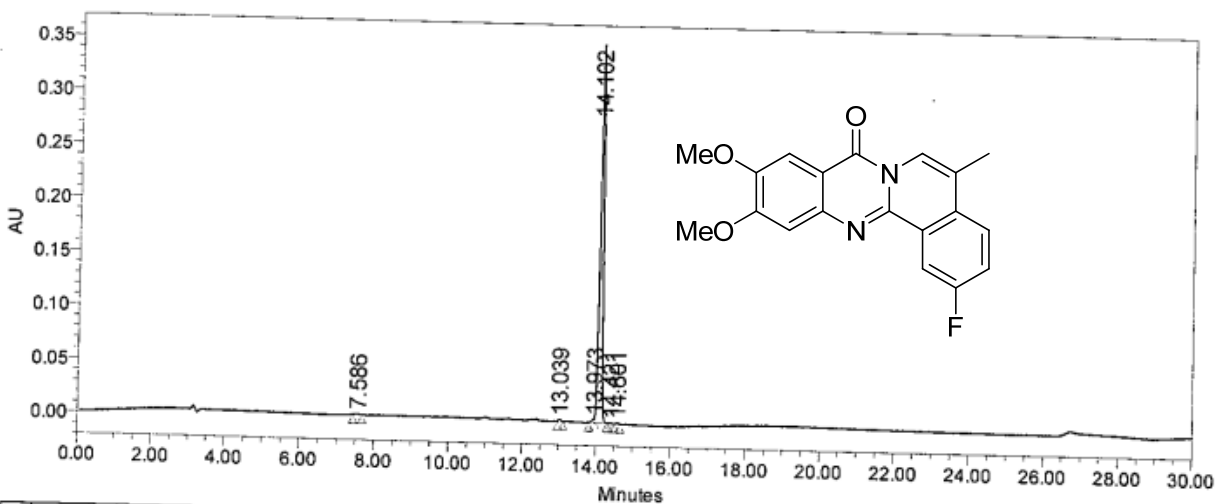

|   | RT     | Area    | % Area | Height |
|---|--------|---------|--------|--------|
| 1 | 7.586  | 9268    | 0.45   | 1179   |
| 2 | 13.039 | 10391   | 0.51   | 2108   |
| 3 | 13.973 | 14424   | 0.71   | 3361   |
| 4 | 14.102 | 1996801 | 97.91  | 350689 |
| 5 | 14.421 | 2820    | 0.14   | 779    |
| 6 | 14.601 | 5752    | 0.28   | 1289   |

Analysed By *M. 20/02/14*

Fig. 66: HPLC of compound **4p**

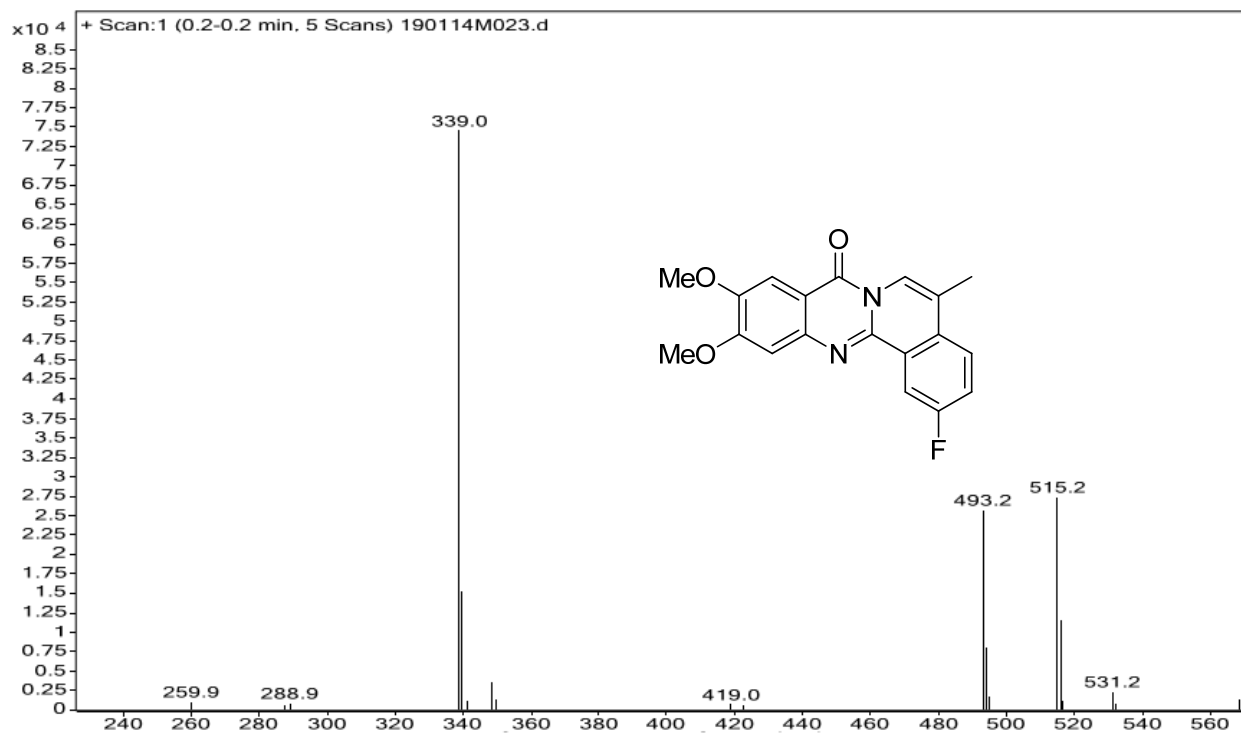

Fig. 67: Mass of compound **4p**

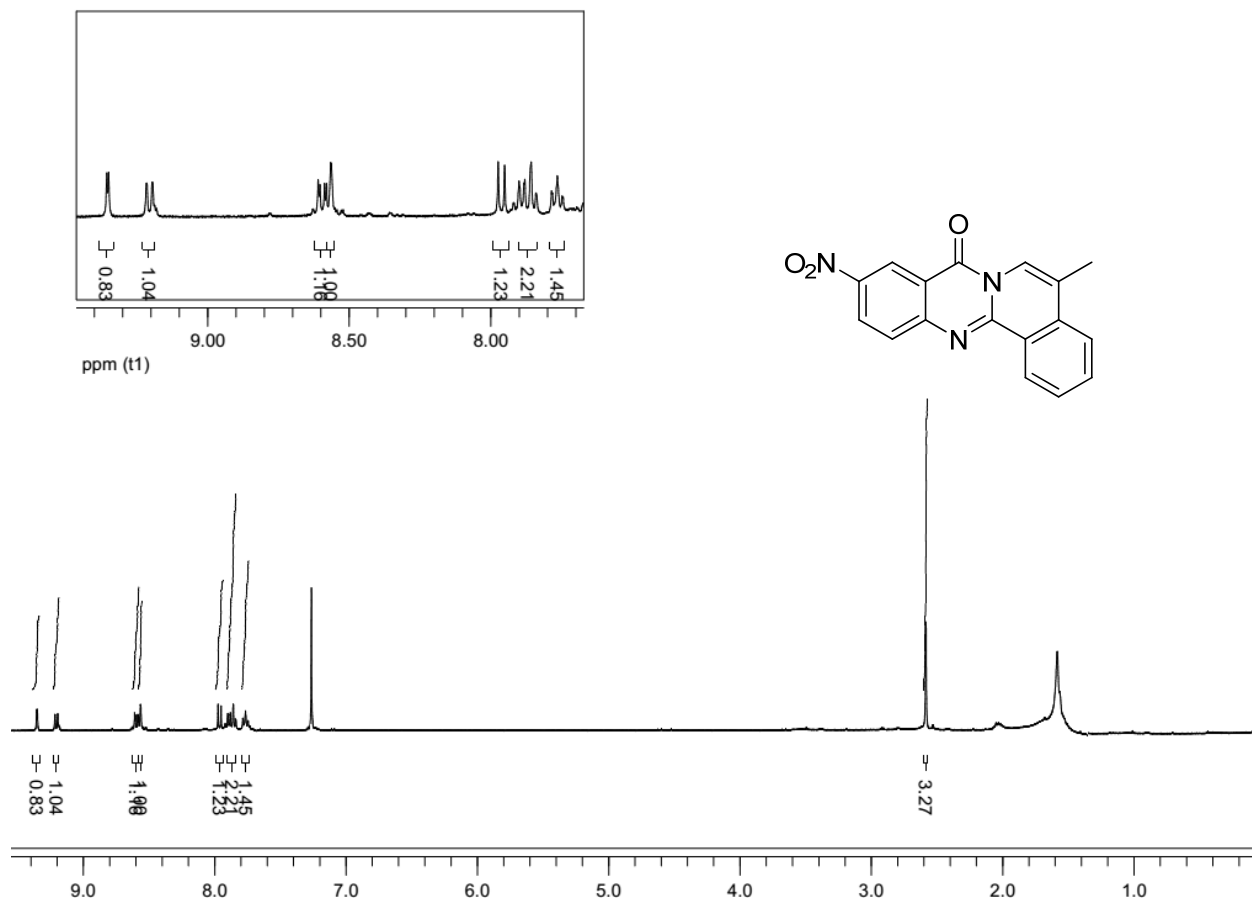

Fig. 68: <sup>1</sup>H NMR spectra of compound **4q** (CDCl<sub>3</sub>, 400 MHz)

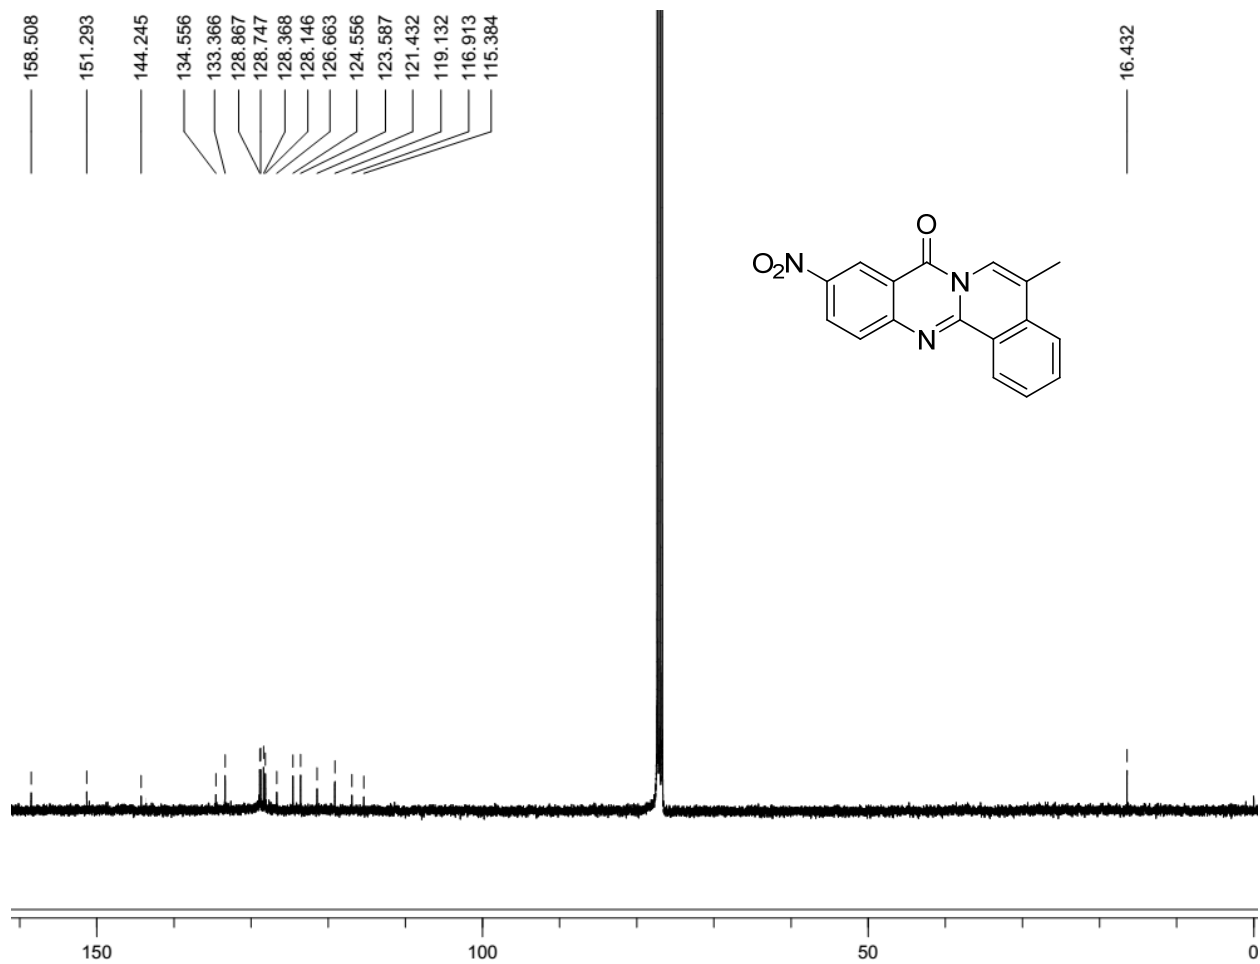

Fig. 69:  $^{13}\text{C}$  NMR spectra of compound **4q** ( $\text{CDCl}_3$ , 100 MHz)

Injection Date : Mon, 10. Feb. 2014  
 Sample Name : ILS-BPS-3-171  
 Acq Operator : RADHA  
 Acq. Method : D:\CHEM32\_002\1\METHODS\C-18 A80B20GS.M  
 Analysis Method : D:\CHEM32\_002\1\METHODS\C-18 A80B20GS.M  
 Method Info : Column : Symmetry C-18 75\*4.6mm, 3.5µm  
 Mobile phase: A) 0.1% HCOOH in Water , B) ACN  
 T/B%:0/20,0.5/20,4/98,10/98,10.5/20,12/20  
 Flow: 1.0 ml/min, Diluent: ACN:Water(80:20)

Seq Line : 0  
 Location : Vial 1  
 Inj. No. : 0  
 Inj. Vol. : 15 µl

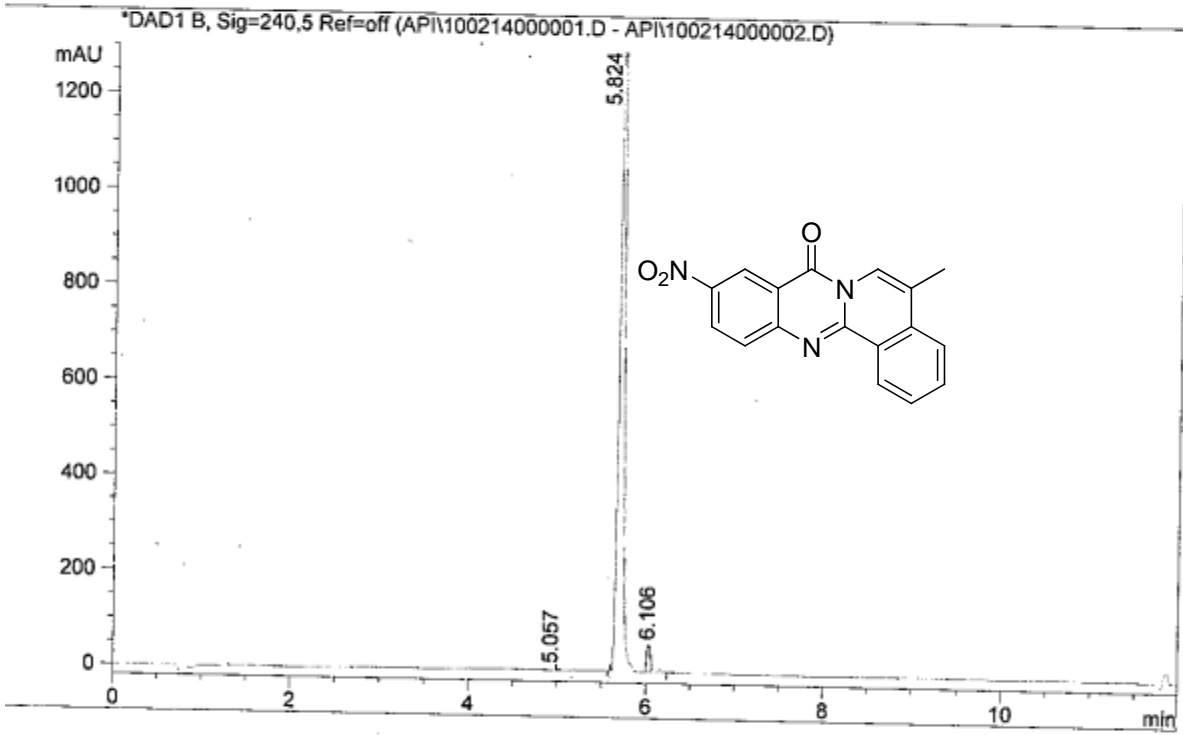

Signal 1: DAD1 B, Sig=240,5 Ref=off

| Peak # | RT [min] | Area     | Area % |
|--------|----------|----------|--------|
| 1      | 5.057    | 6.209    | 0.110  |
| 2      | 5.824    | 5350.146 | 94.165 |
| 3      | 6.106    | 280.288  | 5.724  |

\*\*\* End of Report \*\*\*

*M*  
10/02/14

Fig. 70: HPLC of compound 4q

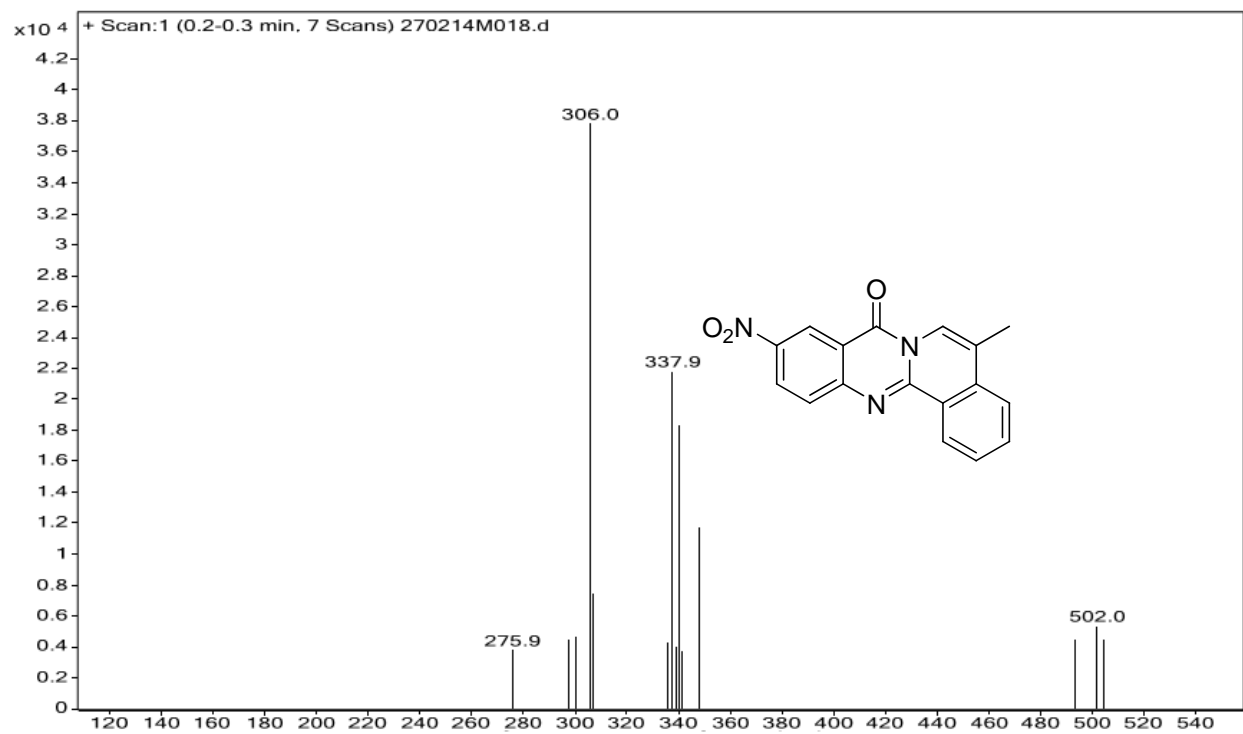

Fig. 71: Mass of compound **4q**

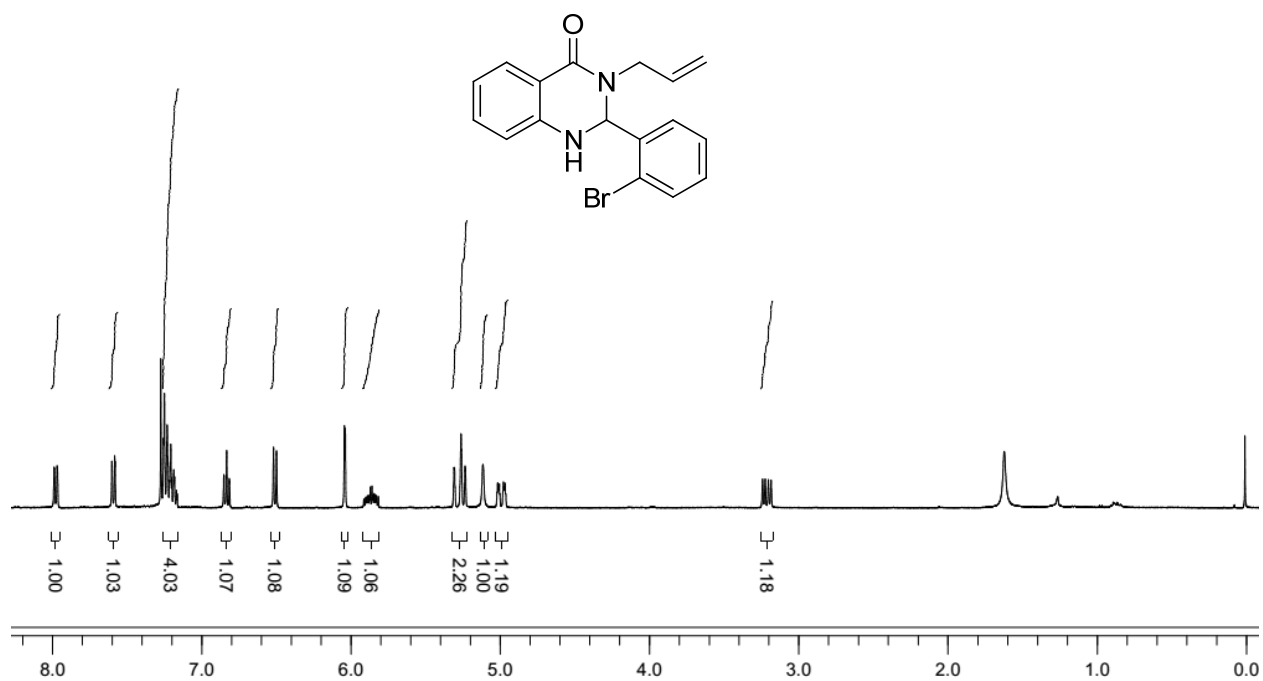

Fig. 72: <sup>1</sup>H NMR spectra of compound **5** (CDCl<sub>3</sub>, 400 MHz)



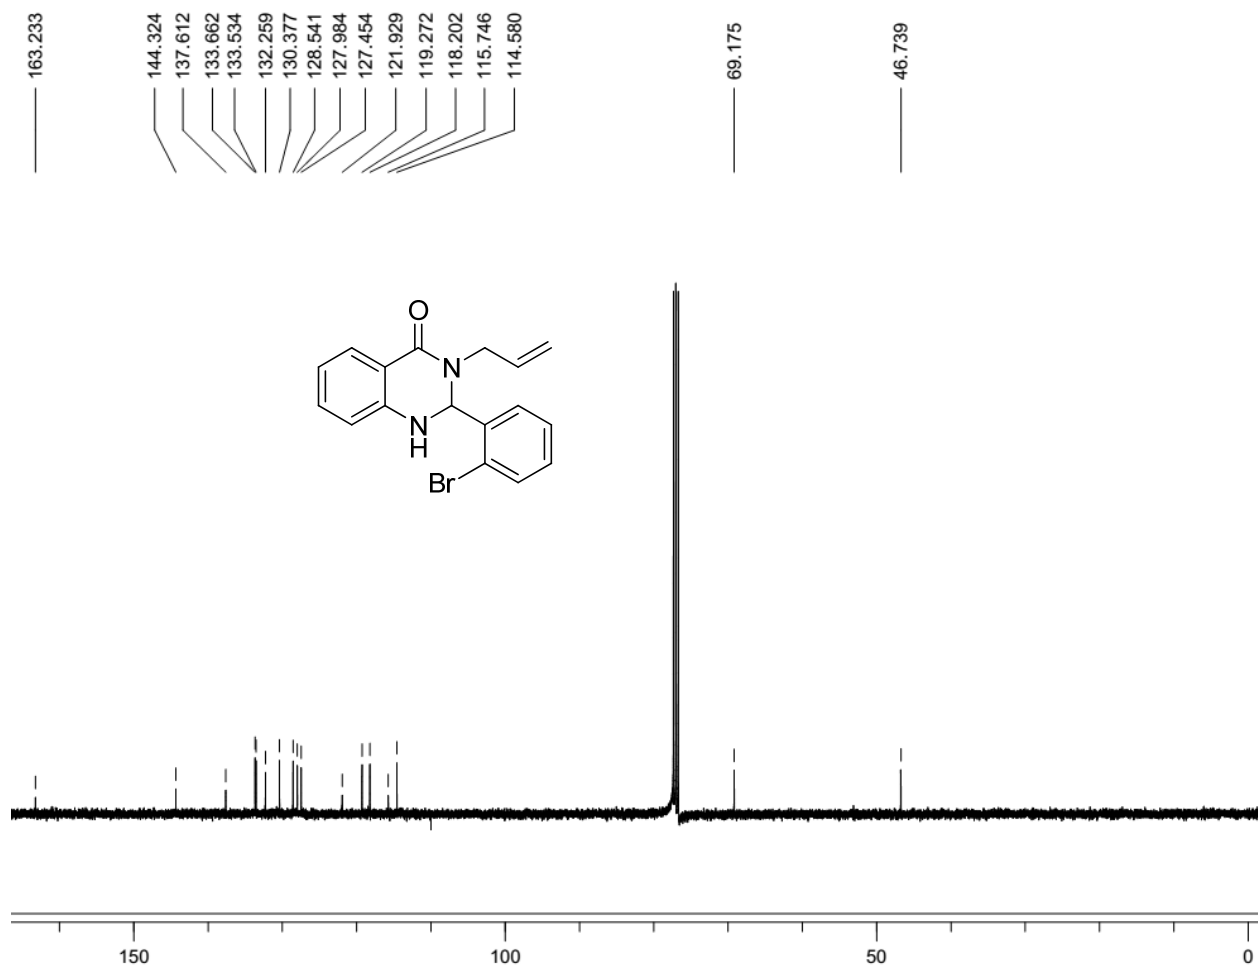

Fig. 73:  $^{13}\text{C}$  NMR spectra of compound 5 ( $\text{CDCl}_3$ , 100 MHz)

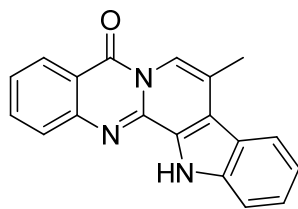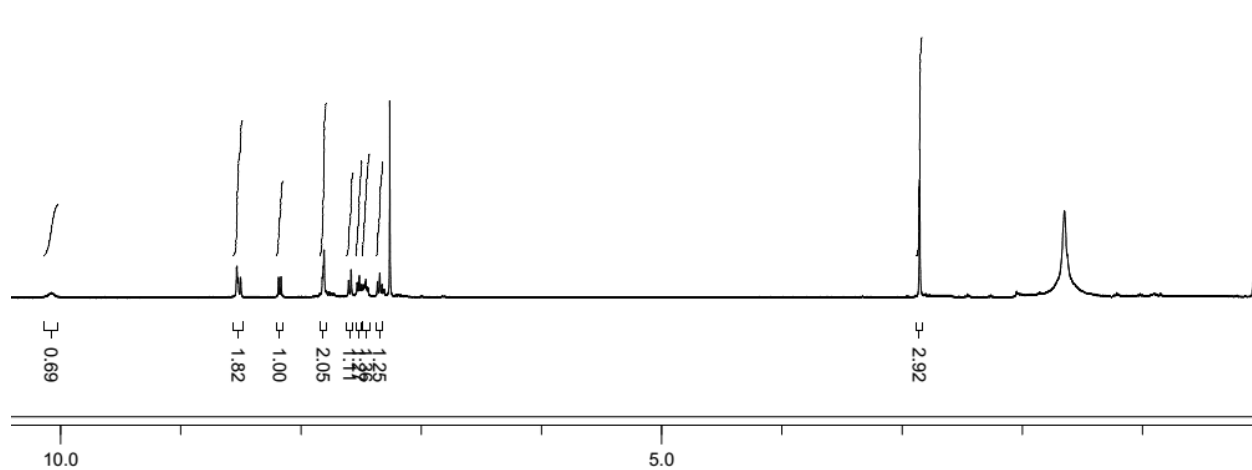

Fig. 74:  $^1\text{H}$  NMR spectra of compound **6** ( $\text{CDCl}_3$ , 400 MHz)

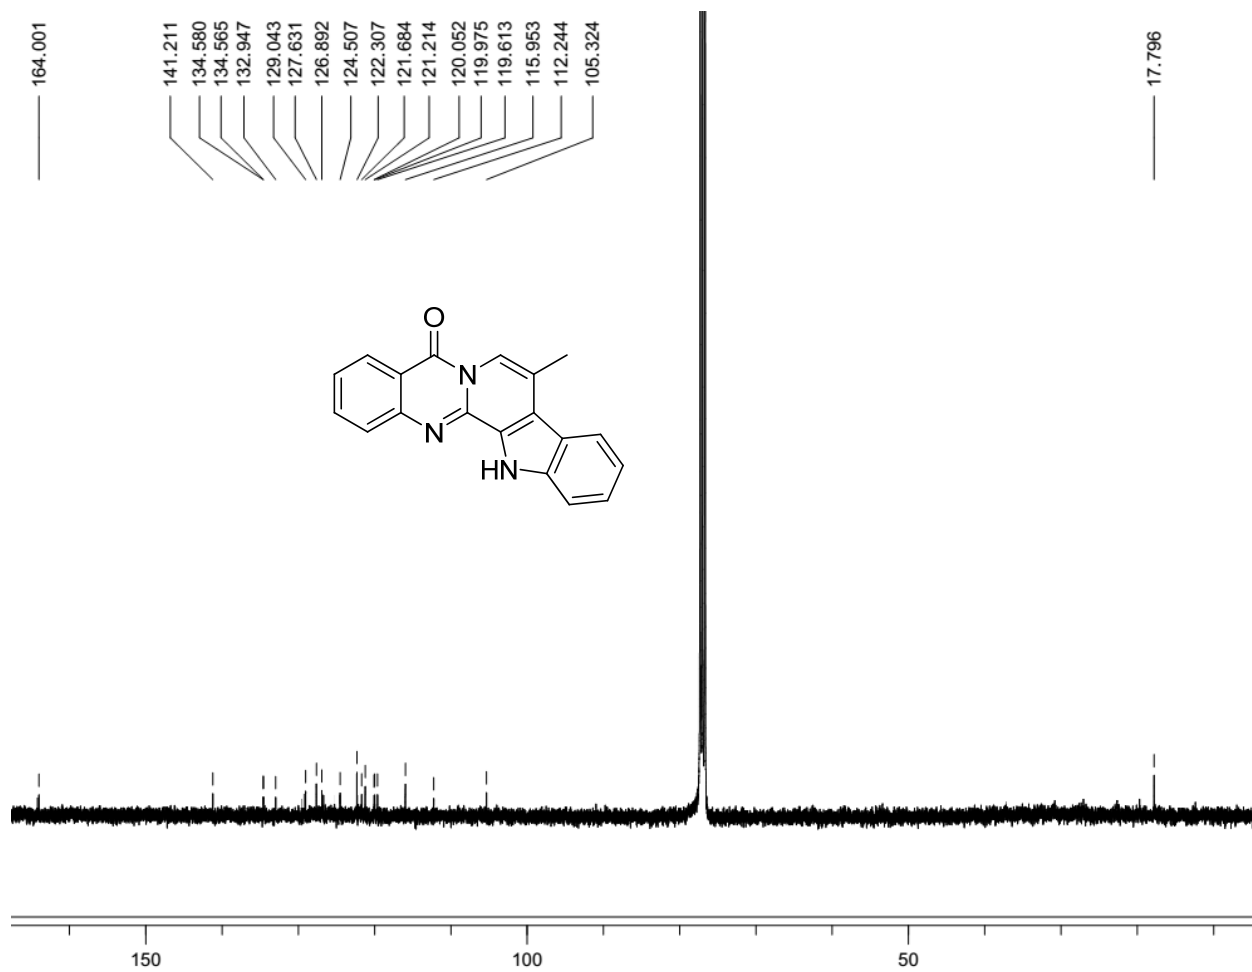

Fig. 75:  $^{13}\text{C}$  NMR spectra of compound **6** ( $\text{CDCl}_3$ , 100 MHz)

Inj Date : Mon, 14. Apr. 2014 Acq Operator: SHASHIDHAR  
 Sample Name : ILS/ARJ/5/26 Vial 5  
 A.R Number : CM14D010 -> Inj. Vol. : 10µL  
 Acq. Method : D:\CHEM32\_002\1\METHODS\C-18 A80B20.M  
 Analysis Method : D:\CHEM32\_002\1\METHODS\C-18 A80B20.M  
 Method Info : Column : Symmetry C-18 75\*4.6mm3.5µm  
 Mobile phase: A) 0.1% TFA in water , B) ACN  
 T/B% : 0/20,1/20,6/98,10/98,12/20,15/20.  
 Flow: 1.0 ml/min Diluent: ACN:Water(80:20)

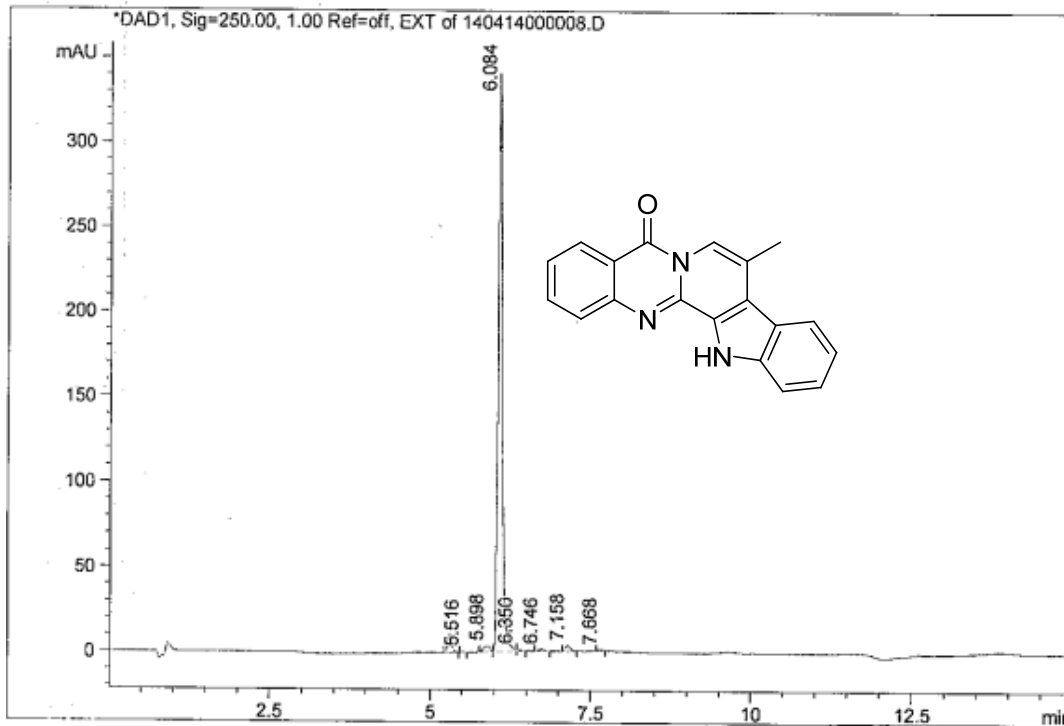

Signal 1: DAD1, Sig=250.00, 1.00 Ref=off, EXT

| Peak # | RT [min] | Area     | Area % |
|--------|----------|----------|--------|
| 1      | 5.308    | 47.263   | 2.778  |
| 2      | 5.516    | 1.210    | 0.071  |
| 3      | 5.898    | 21.233   | 1.248  |
| 4      | 6.084    | 1601.773 | 94.132 |
| 5      | 6.350    | 3.514    | 0.207  |
| 6      | 6.746    | 7.196    | 0.423  |
| 7      | 7.158    | 16.680   | 0.980  |
| 8      | 7.668    | 2.752    | 0.162  |

Fig. 76: HPLC of compound 6

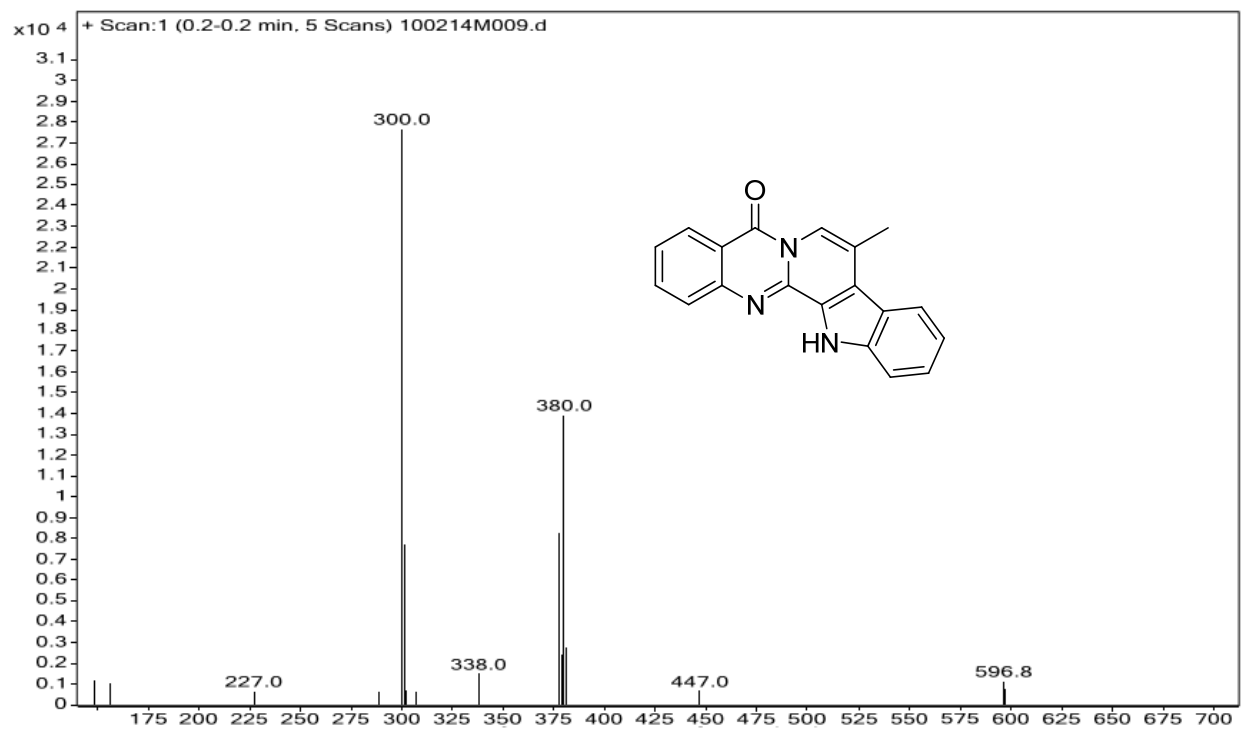

Fig. 77: Mass of compound 6
